# Supplementary material for: A new variant of the colistin resistance gene MCR-1 with co-resistance to β-lactam antibiotics reveals a potential novel antimicrobial peptide
Source: PubMed Central journal article supplement (PMC10786390; doi:10.1371/journal.pbio.3002433), 2023-12-13
Supplement: pbio.3002433.s002.pdf [file pbio.3002433.s002.pdf]

1 **Supplementary figures**

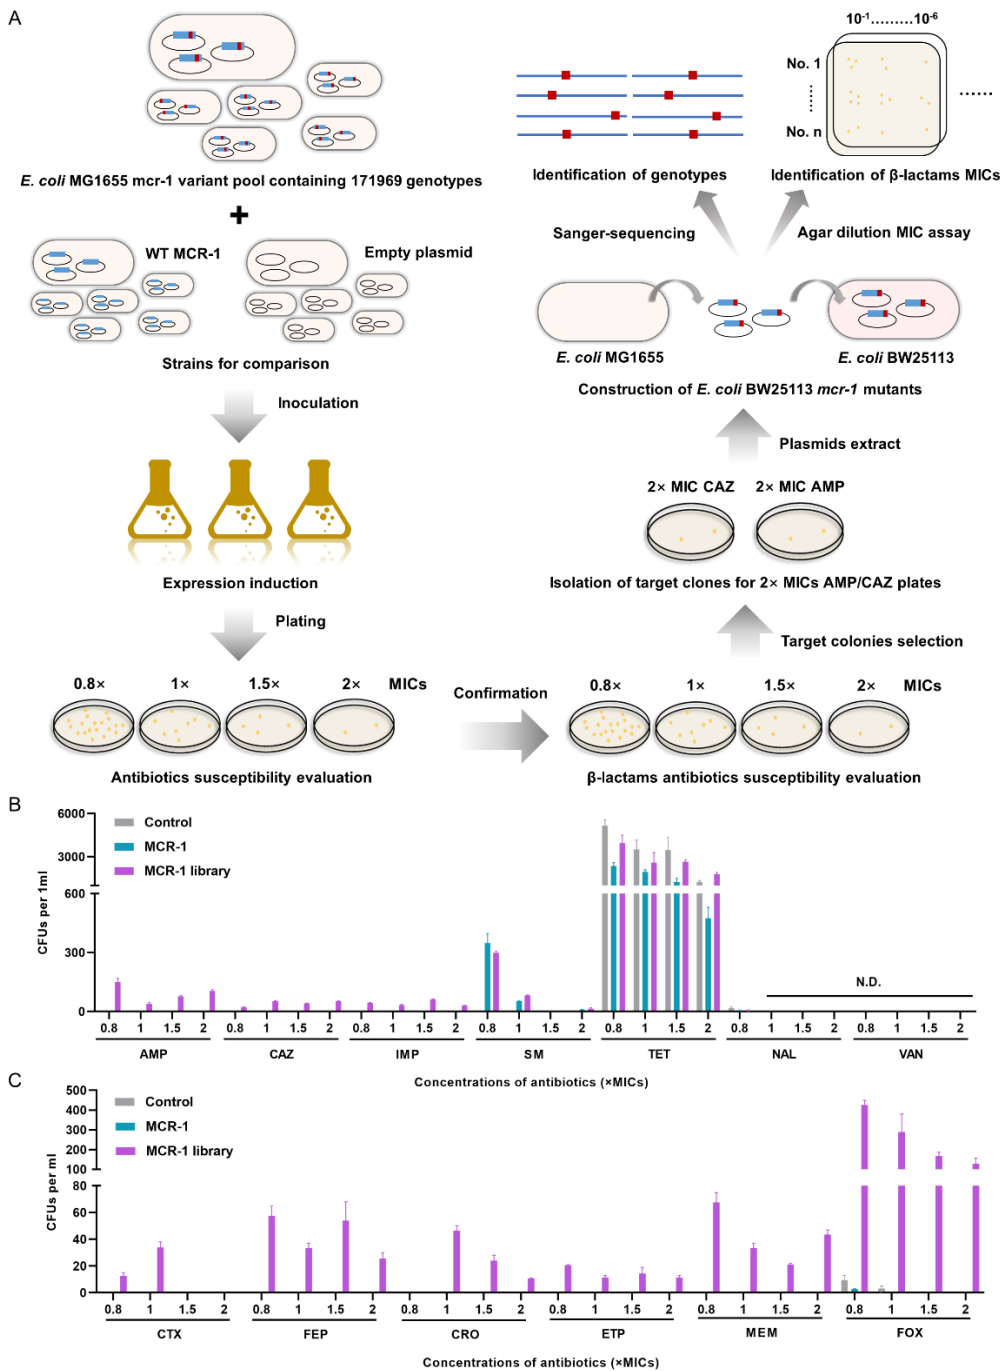

2  
3 **Figure S1. Identification of isolates with reduced sensitivity towards  $\beta$ -lactam antibiotics from**  
4 **the MCR-1 mutant library.**

5 **(A)** The schematic illustration shows the process of screening MCR-1 mutants with reduced  
6 susceptibility towards  $\beta$ -lactams. The variant library containing 171969 genotypes was cloned into the  
7 medium-copy plasmid pACYDuet-1 to generate the *E. coli* BW25113 strain pool. *E. coli* strains carrying  
8 WT MCR-1 or empty plasmid were set as control. Logarithmic-phase cultures of the three strains were  
9 first induced with 0.2% arabinose for 2 hr, followed by plating on LB agar plates containing AMP, CAZ,  
10 IMP, SM, TET, NAL or VAN. All antibiotics were in the concentrations of 0.8x, 1x, 1.5x and 2x MICs.  
11 After incubation at 37 °C for 16 hr, the number of surviving bacilli was counted to evaluate antibiotic

12 susceptibility **(B)**. It appears that certain MCR-1 variants exhibited reduced sensitivity to  $\beta$ -lactam  
13 antibiotics. To confirm the sensitivity of  $\beta$ -lactam antibiotics among the three strains, a similar process  
14 was performed, and well-induced cultures were plated on LB agar plates containing CTX, FEP, CRO,  
15 ETP, MEM or FOX. CFUs were counted after incubation at 37 °C for 16 hr **(C)**. Fifty colonies of the *mcr-*  
16 *1* library in the background of *E. coli* BW25113 were selected from the plates containing CAZ or AMP.  
17 For each isolate, the pACYCDuet-1 plasmid carrying *mcr-1* variants was extracted, followed by  
18 transformation into *E. coli* BW25113 electroporation competent cells to eliminate influence caused by  
19 chromosomal mutation. Next, reconstructed strains were subjected to agar dilution MICs test to verify  
20 susceptibility to CAZ, AMP or FOX. In addition, the *mcr-1* genotypes of the target isolates were verified  
21 through Sanger sequencing. Both Panels **(B)** and **(C)** were visualized with Prism 9 software. All the  
22 above-described experiments were performed three times with similar results. Error bars indicate  
23 standard errors of the means (SEMs) for three biological replicates. The raw data underlying this Figure  
24 can be found in S1\_data.
