# Supplementary material for: A new variant of the colistin resistance gene MCR-1 with co-resistance to β-lactam antibiotics reveals a potential novel antimicrobial peptide
Source: PubMed Central journal article supplement (PMC10786390; doi:10.1371/journal.pbio.3002433), 2023-12-13
Supplement: pbio.3002433.s004.pdf [file pbio.3002433.s004.pdf]

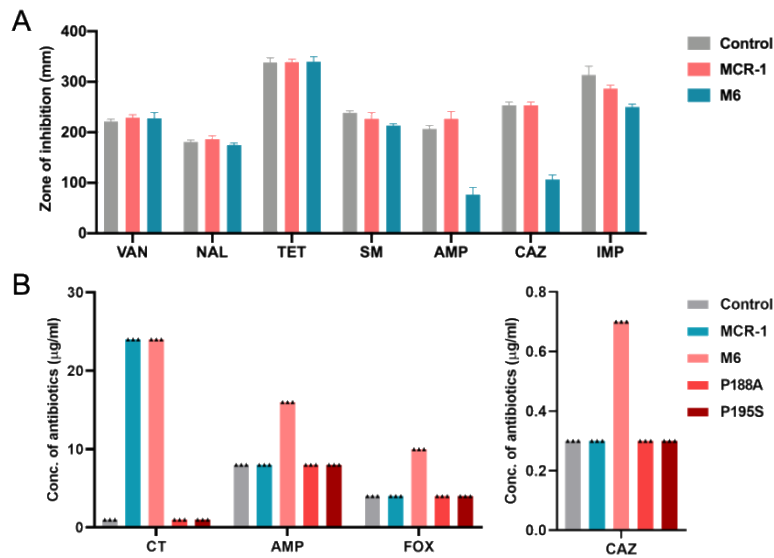

33

34 **Figure S3. Verification of the  $\beta$ -lactam antibiotic co-resistance rendered by M6.**35 **(A)** Zone of inhibition of *E. coli* BW25113 harbouring empty plasmid, MCR-1 or M6 generated by disk  
36 diffusion method.37 **(B)** Different levels of antibiotic sensitivity in *E. coli* expressing either wild-type MCR-1, M6 or its single  
38 point mutants.

39 The raw data underlying this Figure can be found in S1\_data.

40
