# Supplementary material for: A new variant of the colistin resistance gene MCR-1 with co-resistance to β-lactam antibiotics reveals a potential novel antimicrobial peptide
Source: PubMed Central journal article supplement (PMC10786390; doi:10.1371/journal.pbio.3002433), 2023-12-13
Supplement: pbio.3002433.s006.pdf [file pbio.3002433.s006.pdf]

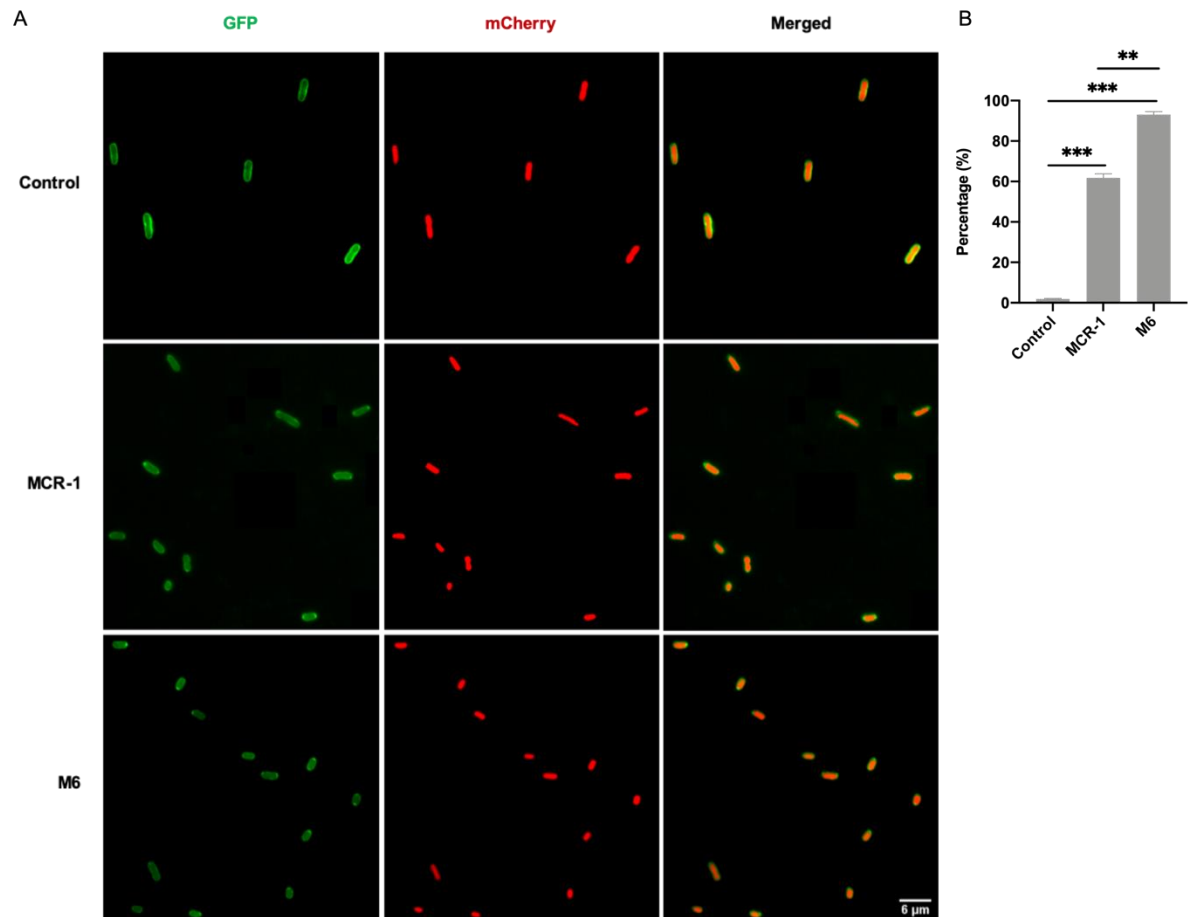

66

67 **Figure S5. Expression of M6 inducing *E. coli* membrane shrinkage.**

68 **(A)** Representative periplasmic GFP and cytoplasmic mCherry images of *E. coli* BW25113 cells  
 69 expressing MCR-1 or M6 during stationary stage. Shrinkage of the cytoplasm was evident by the bright  
 70 periplasmic GFP signal. **(B)** The percentage of cells exhibiting shrinkage at pole(s) were calculated.  
 71 The graph was visualized with Prism 9 software.

72 All the above-described experiments were performed three times with similar results. Error bars indicate  
 73 standard errors of the means (SEMs) for three biological replicates. A two-tailed unpaired *t* test was  
 74 performed to determine the statistical significance of the data. \*\*,  $P < 0.01$ ; \*\*\*,  $P < 0.001$ . The raw data  
 75 underlying this Figure can be found in S1\_data.

76
