# Supplementary material for: A new variant of the colistin resistance gene MCR-1 with co-resistance to β-lactam antibiotics reveals a potential novel antimicrobial peptide
Source: PubMed Central journal article supplement (PMC10786390; doi:10.1371/journal.pbio.3002433), 2023-12-13
Supplement: pbio.3002433.s008.pdf [file pbio.3002433.s008.pdf]

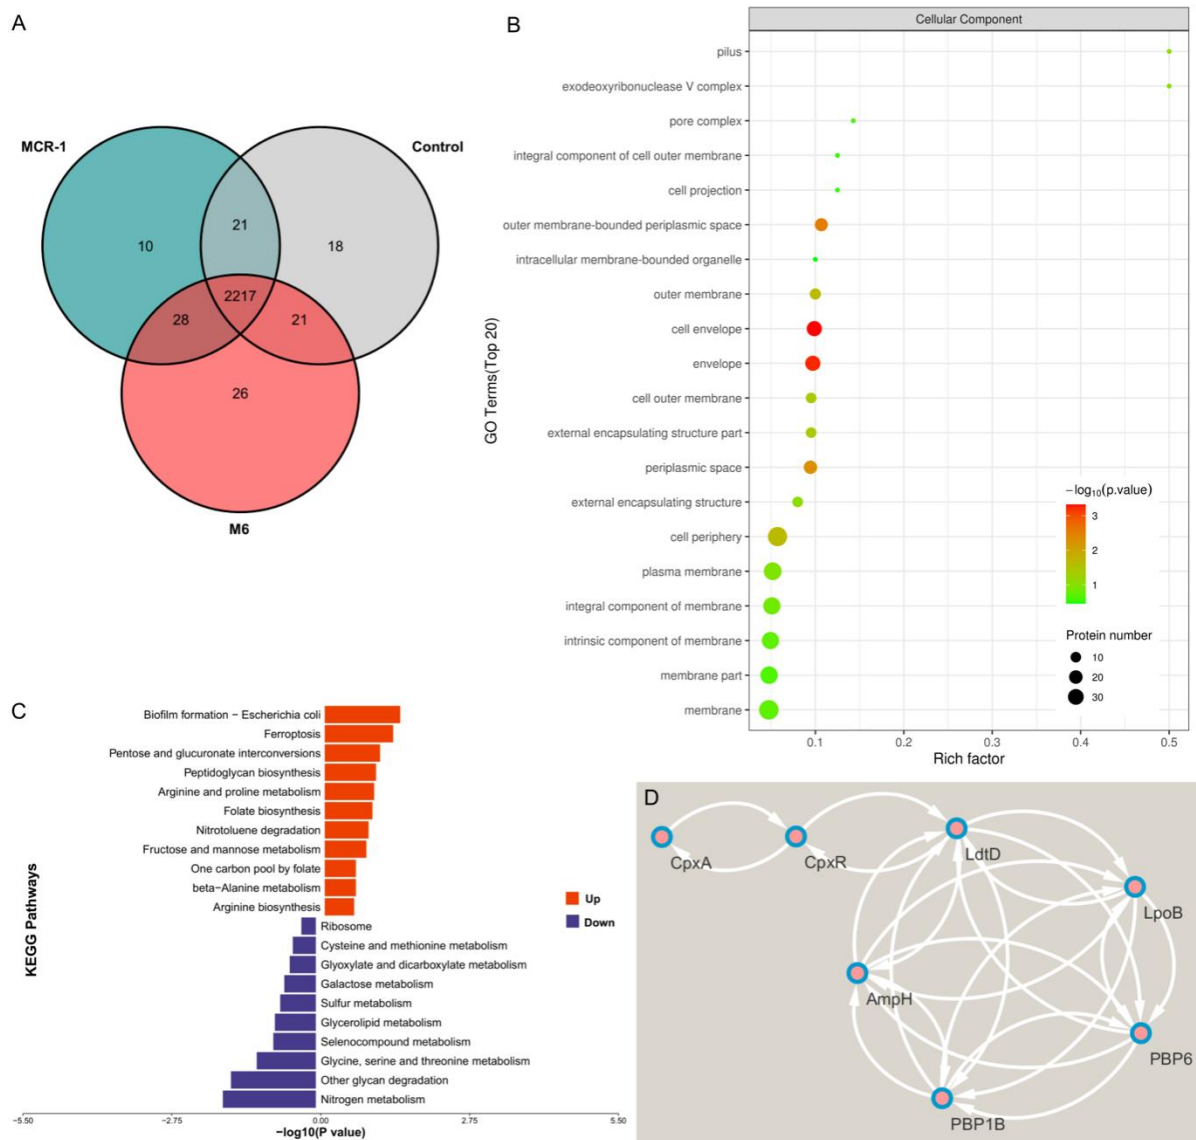

90  
 91 **Figure S7. Comprehensive proteome profiles of M6 using label-free quantitative proteomics.**  
 92 **(A)** Venn diagram representing the differentially expressed proteins of *E. coli* BW25113 that harboured  
 93 empty vector (control), MCR-1 and M6 during the exponential phase with the induction of 0.2%  
 94 arabinose. **(B)** Top 20 pathways according to GO enrichment. The size and colour of the points  
 95 represent the number of target proteins and the q-values, respectively. The rich factor showed the  
 96 enrichment degree in the GO pathway. **(C)** Visualization of the top KEGG enrichment pathway in M6-  
 97 expressing cells compared with MCR-1-expressing cells. The upregulated pathway is labelled in red,  
 98 whereas the downregulated pathway is labelled in blue. **(D)** Protein–protein interaction (PPI) analysis  
 99 of the peptidoglycan layer remodelling pathway in M6 based on proteomics profiles, which were  
 100 analysed by STRING and visualized with Cytoscape software. Two biological replicates for each strain  
 101 were used for the analysis.

102
