# Supplementary material for: A new variant of the colistin resistance gene MCR-1 with co-resistance to β-lactam antibiotics reveals a potential novel antimicrobial peptide
Source: PubMed Central journal article supplement (PMC10786390; doi:10.1371/journal.pbio.3002433), 2023-12-13
Supplement: pbio.3002433.s010.pdf [file pbio.3002433.s010.pdf]

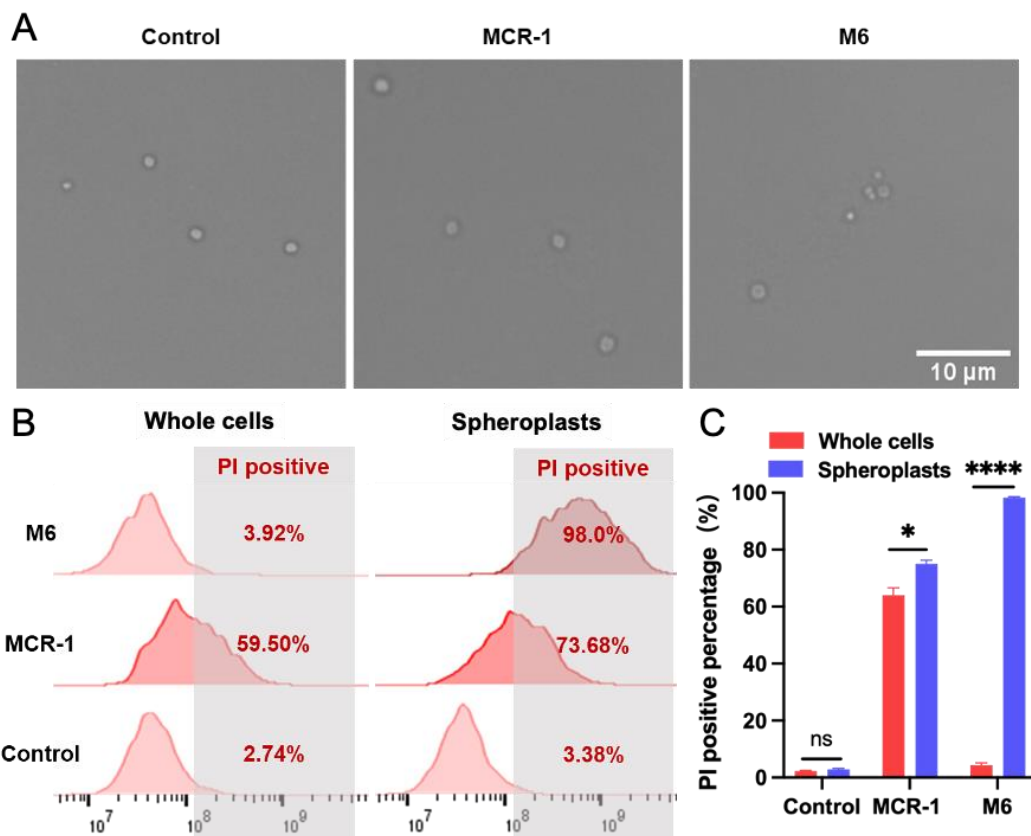

137

138

**Figure S9. Spheroplasts LPS level perturbation of MCR-1 or M6 -bearing *E. coli*.**

139 **(A)** Morphology observation of spheroplasts for indicated strains. The shape of *E. coli* was changed  
 140 from rob-shape into ball-shape, representing successful generation of spheroplasts.

141 **(B-C)** The inner membrane permeability of indicated spheroplasts were evaluated by PI staining assay.  
 142 The well-prepared spheroplasts were incubated with PI dye for 15 min. The PI-positive proportion was  
 143 determined by flow cytometry and analysed by FlowJo version 10 software.

144 All the above-described experiments were performed three times with similar results. Error bars indicate  
 145 standard errors of the means (SEMs) for three biological replicates. A two-tailed unpaired *t* test was  
 146 performed to determine the statistical significance of the data. ns, no significant difference; \*,  $P < 0.1$ ;  
 147 \*\*\*\*,  $P < 0.0001$ . The raw data underlying this Figure can be found in S1\_data.
