# Supplementary material for: A new variant of the colistin resistance gene MCR-1 with co-resistance to β-lactam antibiotics reveals a potential novel antimicrobial peptide
Source: PubMed Central journal article supplement (PMC10786390; doi:10.1371/journal.pbio.3002433), 2023-12-13
Supplement: pbio.3002433.s011.pdf [file pbio.3002433.s011.pdf]

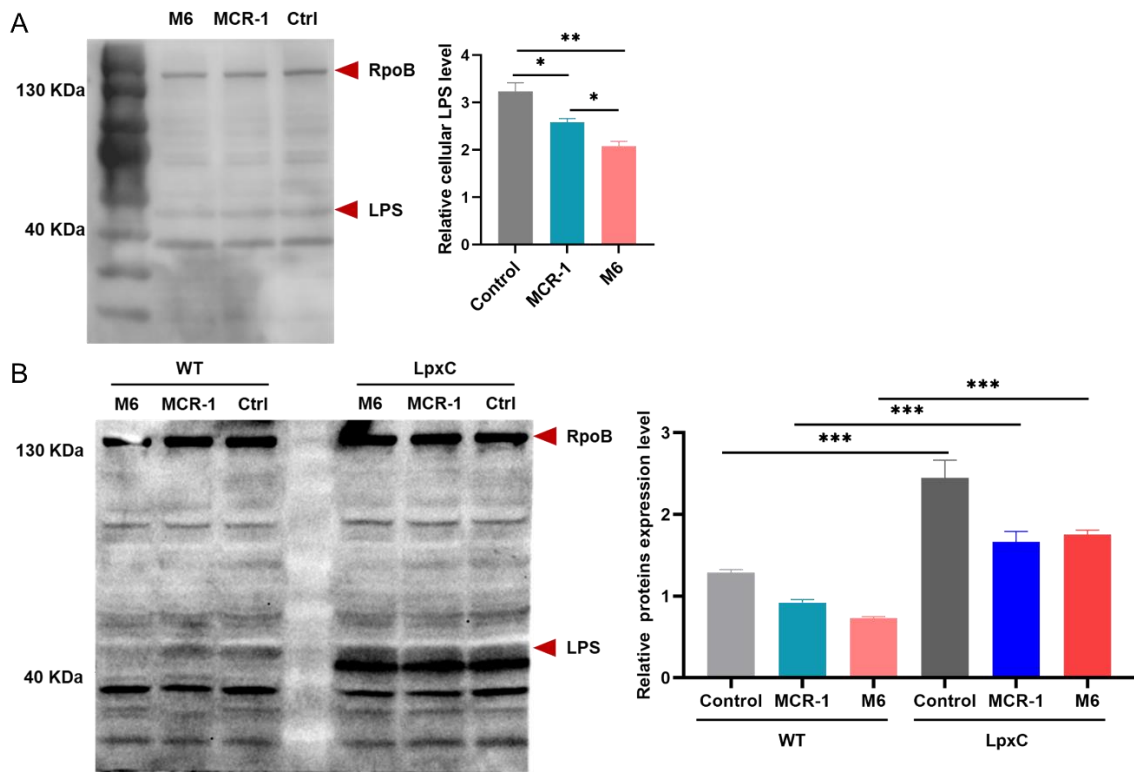

148

149

**Figure S10. Cellular LPS level in spheroplasts and LpxC overexpressing strains.**

150 The cellular LPS level in spheroplasts (**A**) or LpxC overexpressing strains (**B**) harbouring empty plasmid,

151 MCR-1 or M6 were determined by western blot. Error bars indicate standard errors of the means (SEM)

152 for triple biological replicates. A two-tailed unpaired *t* test was performed to determine the statistical

153 significance of the data. \*,  $P < 0.1$ ; \*\*,  $P < 0.01$ ; \*\*\*,  $P < 0.001$ . The bar graph was visualized with Prism

154 9 software. The raw data underlying this Figure can be found in S1\_data.
