# Supplementary material for: A new variant of the colistin resistance gene MCR-1 with co-resistance to β-lactam antibiotics reveals a potential novel antimicrobial peptide
Source: PubMed Central journal article supplement (PMC10786390; doi:10.1371/journal.pbio.3002433), 2023-12-13
Supplement: pbio.3002433.s012.pdf [file pbio.3002433.s012.pdf]

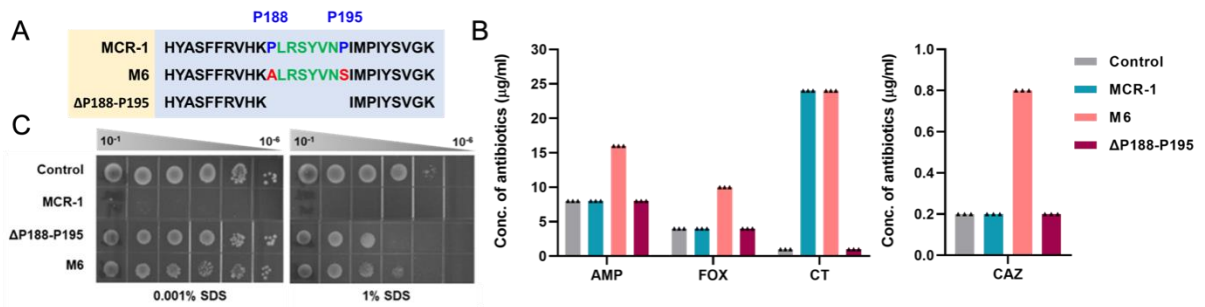

155

156

**Figure S11. Necessity of P188-P195 segment for MCR-1 activity.**

157

**(A)** Deletion of the region that includes P188-P195. *E. coli* BW25113 carrying ΔP188-P195 was generated, and the susceptibilities towards colistin (CT) and β-lactam antibiotics (AMP, FOX and CAZ) were evaluated by agar dilution MIC tests **(B)**. The experiments were performed three times with the same results.

159

160

161

**(C)** Efficiency of plating assays on LB agar plates containing 1% SDS and 1 mM EDTA or 0.001% SDS and 1 mM EDTA. Ten-fold serial-dilution of indicated cultures were inoculated onto the agar plates.

162

The raw data underlying this Figure can be found in S1\_data.

163

164
