# Supplementary material for: A new variant of the colistin resistance gene MCR-1 with co-resistance to β-lactam antibiotics reveals a potential novel antimicrobial peptide
Source: PubMed Central journal article supplement (PMC10786390; doi:10.1371/journal.pbio.3002433), 2023-12-13
Supplement: pbio.3002433.s013.pdf [file pbio.3002433.s013.pdf]

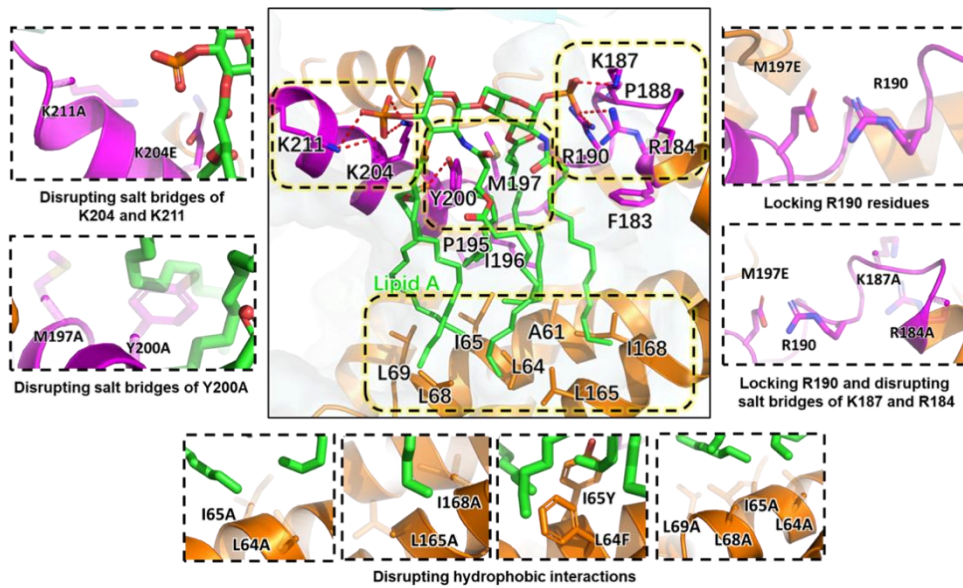

165  
 166  
 167  
 168  
 169  
 170  
 171

**Figure S12. Mutations of essential regions for forming the lipid A binding cavity.**

The close-up view shows the MCR-1 lipid A binding cavity with LPS and the four regions responsible for anchoring LPS. The linker domain and transmembrane domain are in magenta and orange, respectively. LPS binding with MCR-1 is represented as a stick mode and coloured in green. The salt bridges for the interaction with LPS are shown in red. The change in structure with mutated residues in each region is shown in detail.
