# Supplementary material for: A new variant of the colistin resistance gene MCR-1 with co-resistance to β-lactam antibiotics reveals a potential novel antimicrobial peptide
Source: PubMed Central journal article supplement (PMC10786390; doi:10.1371/journal.pbio.3002433), 2023-12-13
Supplement: pbio.3002433.s015.pdf [file pbio.3002433.s015.pdf]

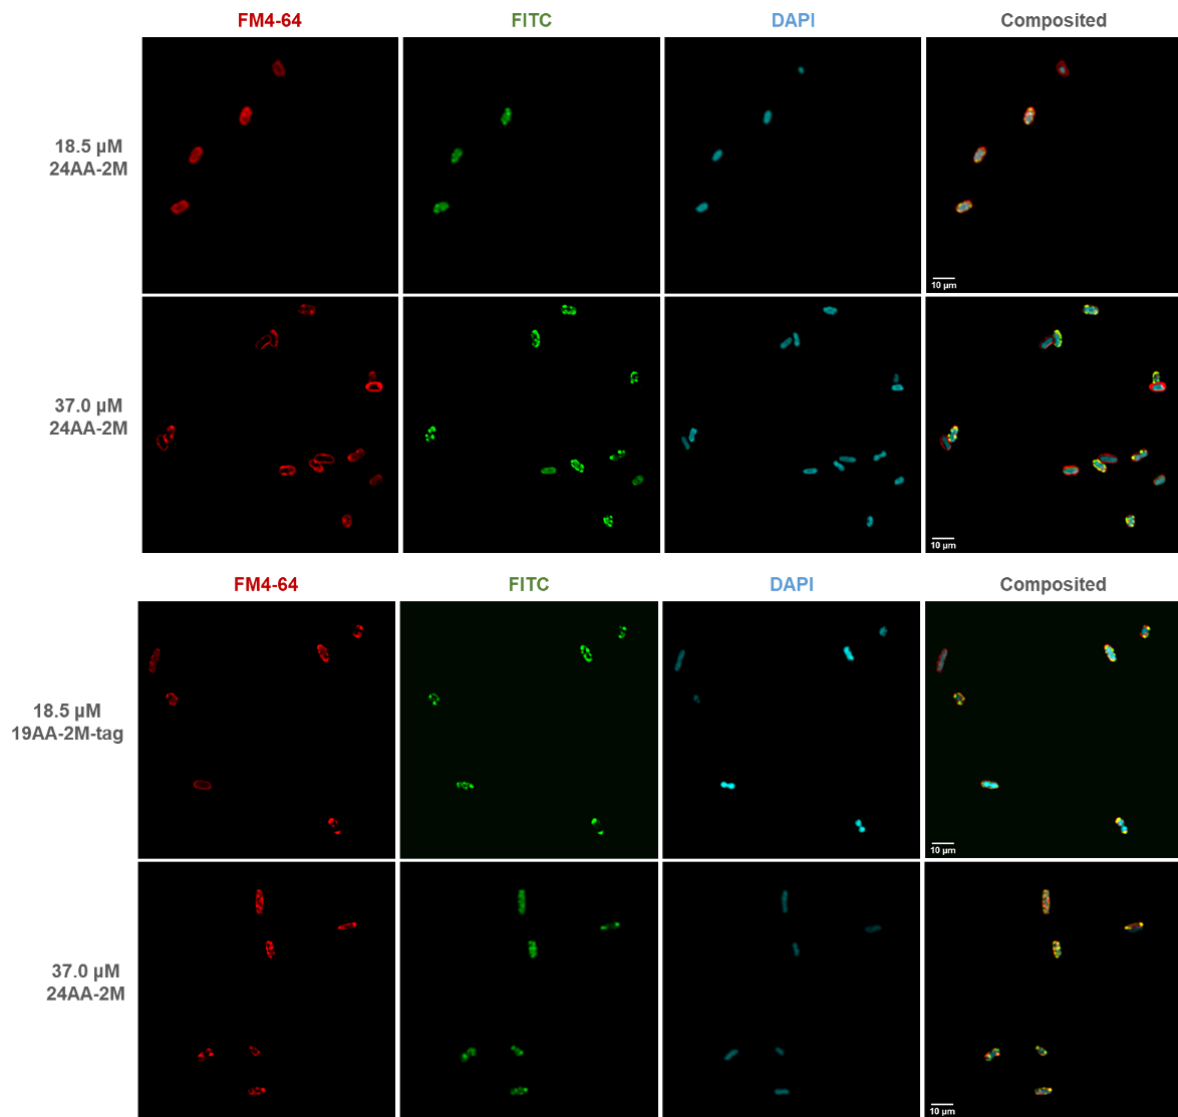

185

186 **Figure S14. Localization of FITC-labelled peptides in *E. coli* ATCC 25922.**

187 Logarithmic phase culture of *E. coli* ATCC 25922 was collected, and stained by FM4-64 (red) and  
 188 DAPI (cyan) to indicate the localization of bacterial membrane as well as cytoplasmic chromosome.

189 The well-stained culture was subsequently treated with FITC-labelled 24AA-2M and 19AA-2M-tag  
 190 in the concentrations of 0.05x and 0.1x MICs (18.5 μM and 37.0 μM), respectively. After washing  
 191 with 1x PBS, the localization of the FITC signal were determined by observation with fluorescent  
 192 microscope.
