# Supplementary material for: A new variant of the colistin resistance gene MCR-1 with co-resistance to β-lactam antibiotics reveals a potential novel antimicrobial peptide
Source: PubMed Central journal article supplement (PMC10786390; doi:10.1371/journal.pbio.3002433), 2023-12-13
Supplement: pbio.3002433.s016.pdf [file pbio.3002433.s016.pdf]

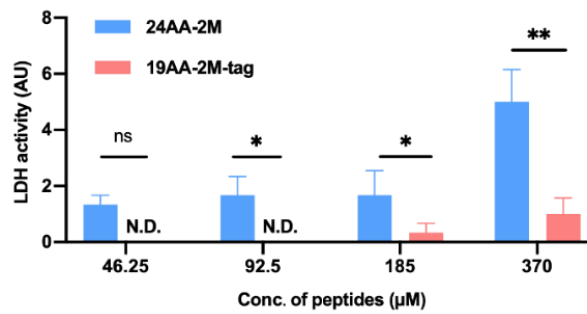

194

195

**Figure S15. Permeabilization of synthetic peptides on mouse blood cells.**

196

To identify the cytotoxicity of 24AA-2M and 19AA-2M-tag, the cell permeabilizing effects of the indicated peptides on mouse blood cells were determined by an LDH-based TOX-7 kit (Sigma). Fresh healthy

197

mouse blood was treated with the above peptides in the concentrations of 46.25, 92.5, 185 or 370 μM.

198

LDH activity was evaluated to determine LDH released from mouse cells. Error bars indicate standard

199

errors of the means (SEMs) for three biological replicates. A two-tailed unpaired *t* test was performed

200

to determine the statistical significance of the data. ns, no significant difference; \*,  $P < 0.1$ ; \*\*,  $P < 0.01$ .

201

The bar graph was visualized with Prism 9 software. N.D., not detected. The raw data underlying this

202

Figure can be found in S1\_data.

203
