# Supplementary material for: A new variant of the colistin resistance gene MCR-1 with co-resistance to β-lactam antibiotics reveals a potential novel antimicrobial peptide
Source: PubMed Central journal article supplement (PMC10786390; doi:10.1371/journal.pbio.3002433), 2023-12-13
Supplement: pbio.3002433.s017.pdf [file pbio.3002433.s017.pdf]

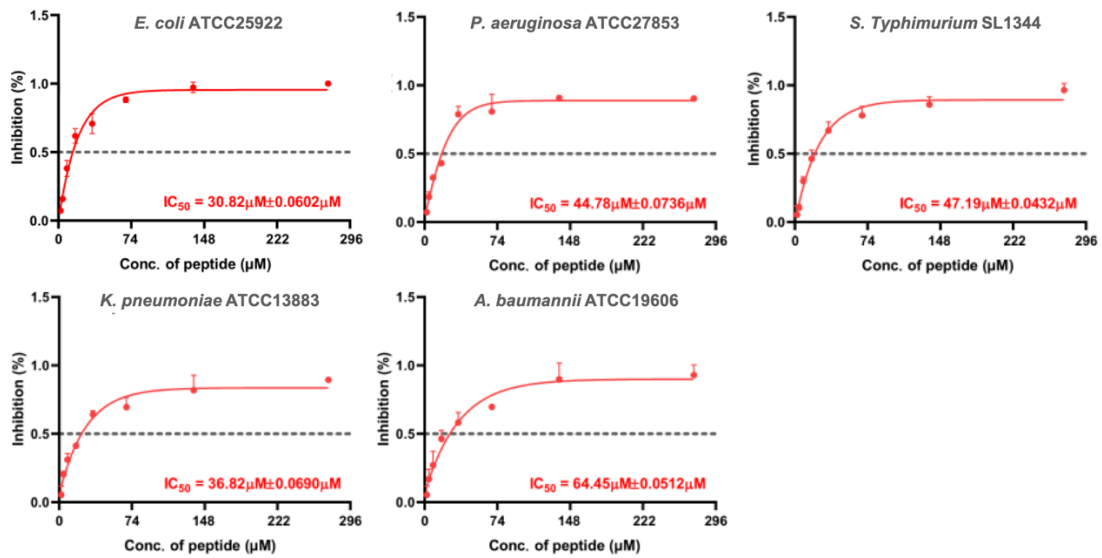

205

206

**Figure S16. Inhibitory rate of 19AA-2M-tag among Gram-negative strains.**

207

By treating *E. coli* ATCC 25922, *P. aeruginosa* ATCC 27853, *S. Typhimurium* SL1344, *K. pneumonic*

208

ATCC 13883, and *A. baumannii* ATCC 19606 with 19AA-2M-tag in a series of concentrations, dose-

209

response curves were generated. The *in vitro* inhibitory rate and IC<sub>50</sub> value of various strains treated

210

with 19AA-2M-tag are presented. The raw data underlying this Figure can be found in S1\_data.
