# Supplementary material for: A new variant of the colistin resistance gene MCR-1 with co-resistance to β-lactam antibiotics reveals a potential novel antimicrobial peptide
Source: PubMed Central journal article supplement (PMC10786390; doi:10.1371/journal.pbio.3002433), 2023-12-13
Supplement: pbio.3002433.s018.pdf [file pbio.3002433.s018.pdf]

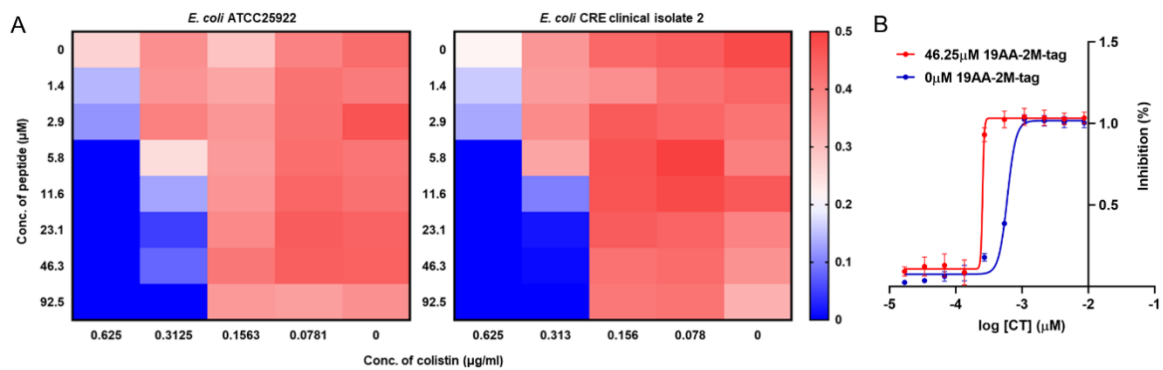

212

213

**Figure S17. Synergistic inhibition of *E. coli* growth by 19AA-2M-tag and colistin.**

214

**(A)** *E. coli* ATCC 25922 and a carbapenem-resistant *E. coli* isolated in the clinic were used to test the efficacy of a drug combination consisting of 19AA-2M-tag and colistin through a checkerboard assay.

215

A total of  $1 \times 10^3$  CFUs of the indicated strains were inoculated at initiation ( $T_0$ ), followed by treatment

216

with drug combinations in a series of concentrations at 37 °C for 16 hr ( $T_n$ ). The  $OD_{600}$  was measured

217

before and after the treatment. The graphs show the value of  $OD_{600 T_0}$  minus the  $OD_{600 T_n}$  of each well

218

for both strains. A colour gradient heat map, with hot (red:  $OD_{600} = 0$ ) to cool (blue:  $OD_{600} = 0.5$ ) colours,

219

indicates low to high values. The synergetic effect was further determined by calculating the FICI. **(B)**

220

shows the inhibition curves of colistin with (red) or without (blue) the addition of 19AA-2M-tag. The

221

dose–response curves of *E. coli* ATCC 25922 were generated by measuring the inhibitory rate after

222

treatment with colistin in a series of concentrations, with or without co-treatment with 92.5 μM 19AA-

223

2M-tag. The raw data underlying this Figure can be found in S1\_data.

224
