# Supplementary material for: A new variant of the colistin resistance gene MCR-1 with co-resistance to β-lactam antibiotics reveals a potential novel antimicrobial peptide
Source: PubMed Central journal article supplement (PMC10786390; doi:10.1371/journal.pbio.3002433), 2023-12-13
Supplement: pbio.3002433.s021.pdf [file pbio.3002433.s021.pdf]

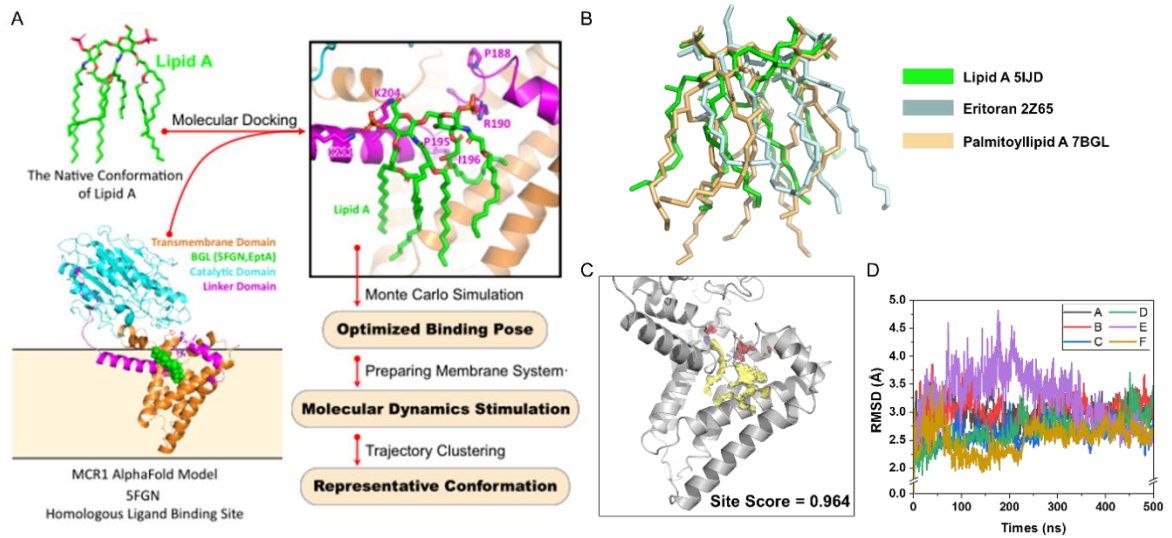

**Figure S20. Analysis of the molecular dynamic simulation and binding energy.**

Molecular dynamic stimulation was utilized to discover the potential LPS binding cavity on the surface of MCR-1, and the workflow was designed as shown in **(A)**. Structural comparison within lipid A (PDB code: 5IJD) and its analogues: Eritoran (PDB code: 2Z65) and Palmitoyllipid A (PDB code: 7BGL) are shown in **(B)**. **(C)** The potential lipid A binding site on the surface of MCR-1 was discovered by SiteMap of Maestro. **(D)** shows the RMSD fluctuations for multiple trajectories of MCR1-lipid A.
