# Supplementary material for: A new variant of the colistin resistance gene MCR-1 with co-resistance to β-lactam antibiotics reveals a potential novel antimicrobial peptide
Source: PubMed Central journal article supplement (PMC10786390; doi:10.1371/journal.pbio.3002433), 2023-12-13
Supplement: pbio.3002433.s022.pdf [file pbio.3002433.s022.pdf]

**Supplementary Table 1. Concentrations of antibiotics used for screening the MCR-1 library.**

| Antibiotics | MIC   |      |       |     |
|-------------|-------|------|-------|-----|
|             | 0.8x  | 1x   | 1.5x  | 2x  |
| AMP         | 25.6  | 32   | 48    | 64  |
| CAZ         | 0.4   | 0.5  | 0.75  | 1   |
| IMP         | 0.2   | 0.25 | 0.375 | 0.5 |
| SM          | 25.6  | 32   | 48    | 64  |
| TET         | 6.4   | 8    | 12    | 16  |
| NAL         | 6.4   | 8    | 12    | 16  |
| VAN         | 204.8 | 256  | 384   | 512 |

Concentrations are in µg/ml.
