# Supplementary material for: A new variant of the colistin resistance gene MCR-1 with co-resistance to β-lactam antibiotics reveals a potential novel antimicrobial peptide
Source: PubMed Central journal article supplement (PMC10786390; doi:10.1371/journal.pbio.3002433), 2023-12-13
Supplement: pbio.3002433.s023.pdf [file pbio.3002433.s023.pdf]

**Supplementary Table 2. Concentrations of  $\beta$ -lactam antibiotics used for screening the MCR-1 library.**

| <b>Antibiotics</b> | <b>MIC</b>  |           |             |           |
|--------------------|-------------|-----------|-------------|-----------|
|                    | <b>0.8x</b> | <b>1x</b> | <b>1.5x</b> | <b>2x</b> |
| CTX                | 0.4         | 0.5       | 0.75        | 1         |
| FEP                | 1.6         | 2         | 3           | 4         |
| CRO                | 0.8         | 1         | 1.5         | 2         |
| ETP                | 0.1         | 0.125     | 0.1875      | 0.25      |
| MEM                | 0.025       | 0.031     | 0.047       | 0.063     |
| FOX                | 3.2         | 4         | 6           | 8         |

Concentrations are in  $\mu\text{g/ml}$ .
