# Supplementary material for: A new variant of the colistin resistance gene MCR-1 with co-resistance to β-lactam antibiotics reveals a potential novel antimicrobial peptide
Source: PubMed Central journal article supplement (PMC10786390; doi:10.1371/journal.pbio.3002433), 2023-12-13
Supplement: pbio.3002433.s024.pdf [file pbio.3002433.s024.pdf]

**Supplementary Table 3. Verification of MCR-1 isolates through Sanger sequencing.**

| No. | Mutations           | MICs ( $\mu\text{g/ml}$ ) |     |           |
|-----|---------------------|---------------------------|-----|-----------|
|     |                     | CAZ                       | AMP | FOX       |
| 1   | V22D, A23D, A30T    | 0.2                       | 8   | 4         |
| 2   | S171A               | 0.2                       | 8   | 4         |
| 3   | P171L, A174V        | 0.4                       | 16  | 4         |
| 4   | L165P               | 0.4                       | 16  | 8         |
| 5   | WT                  | 0.2                       | 8   | 4         |
| 6   | P188A, P195S        | $\geq 0.6$                | 16  | $\geq 10$ |
| 7   | H186Q, P188T        | 0.4                       | 16  | 4         |
| 8   | P188R               | 0.4                       | 8   | 4         |
| 9   | A123E, R128L        | 0.2                       | 8   | 4         |
| 10  | WT                  | 0.2                       | 8   | 4         |
| 11  | T53K                | 0.2                       | 8   | 4         |
| 12  | V512L, T514S, H515Y | 0.2                       | 8   | 4         |
| 13  | P493L               | 0.2                       | 8   | 4         |
| 14  | D46V                | 0.2                       | 8   | 4         |
| 15  | WT                  | 0.2                       | 8   | 4         |
| 16  | T558A, C562A        | 0.2                       | 8   | 4         |
| 17  | C563G               | 0.2                       | 8   | 4         |
| 18  | S177R               | 0.4                       | 8   | 4         |
| 19  | T29P                | 0.2                       | 8   | 4         |
| 20  | WT                  | 0.2                       | 8   | 4         |
| 21  | A20S                | 0.2                       | 8   | 4         |
| 22  | V162G, V227E        | 0.2                       | 8   | 4         |
| 23  | V202G               | 0.2                       | 8   | 4         |
| 24  | F495C, F496F, D499G | 0.2                       | 8   | 4         |
| 25  | WT                  | 0.2                       | 8   | 4         |
| 26  | K212R, K500R, Q501R | 0.2                       | 8   | 4         |
| 27  | Q265H               | 0.2                       | 8   | 4         |
| 28  | W8G                 | 0.2                       | 8   | 4         |
| 29  | G87C, T96I, G98G    | 0.2                       | 8   | 4         |
| 30  | D366G, G368V        | 0.2                       | 8   | 4         |
| 31  | V19A, R157L, V533F  | 0.2                       | 8   | 4         |
| 32  | V19A, A342S, D346Y  | 0.2                       | 8   | 4         |
| 33  | WT                  | 0.2                       | 8   | 4         |
| 34  | G368G (WT)          | 0.2                       | 8   | 4         |
| 35  | E418D, Q425R, A430D | 0.2                       | 8   | 4         |
| 36  | WT                  | 0.2                       | 8   | 4         |
| 37  | E418D, Q425R, A430D | 0.2                       | 8   | 4         |
