# Supplementary material for: A new variant of the colistin resistance gene MCR-1 with co-resistance to β-lactam antibiotics reveals a potential novel antimicrobial peptide
Source: PubMed Central journal article supplement (PMC10786390; doi:10.1371/journal.pbio.3002433), 2023-12-13
Supplement: pbio.3002433.s025.pdf [file pbio.3002433.s025.pdf]

**Table S4. The differentially expressed proteins between *E. coli* BW25113 carrying M6 and WT MCR-1**

| <b>Protein_ID</b> | <b>Fc.value</b> | <b>P.value</b> | <b>gene</b>        |
|-------------------|-----------------|----------------|--------------------|
| WP_000830741.1    | 8.87473         | 1.2E-48        | <i>ampH</i>        |
| WP_000471889.1    | 8.27719         | 2.2E-33        | <i>mgtA</i>        |
| WP_000190655.1    | 6.69928         | 4.7E-16        | <i>yfhb</i>        |
| WP_000732512.1    | 5.8143          | 5.8E-14        | <i>rstB</i>        |
| WP_001295285.1    | 4.90911         | 6.5E-08        | <i>pmrD</i>        |
| WP_000820410.1    | 4.89458         | 1.6E-19        | <i>agn43</i>       |
| WP_001092508.1    | 4.6609          | 2E-18          | <i>rstA</i>        |
| WP_001265471.1    | 4.043           | 9.1E-17        | <i>phoP</i>        |
| WP_001380339.1    | 3.81865         | 1.4E-15        | <i>KXD89_14405</i> |
| WP_000705211.1    | 3.67125         | 1.4E-13        | <i>ynfB</i>        |
| WP_001273658.1    | 3.54056         | 1.8E-05        | <i>ymdF</i>        |
| WP_000433476.1    | 3.32089         | 7.1E-13        | <i>maeA</i>        |
| WP_000983871.1    | 3.30813         | 4.9E-05        | <i>trpCF</i>       |
| WP_000883034.1    | 3.22982         | 2.7E-11        | <i>glsA</i>        |
| WP_000597196.1    | 3.20858         | 3E-12          | <i>slyB</i>        |
| WP_000045315.1    | 3.19218         | 3.7E-12        | <i>hemL</i>        |
| WP_000066707.1    | 2.82914         | 9.2E-06        | <i>fumB</i>        |
| WP_000594599.1    | 2.80513         | 1.1E-05        | <i>lpxT</i>        |
| WP_000689228.1    | 2.79104         | 0.0005         | <i>ytfK</i>        |
| WP_000024560.1    | 2.76806         | 1.4E-05        | <i>cbpM</i>        |
| WP_000753946.1    | 2.74409         | 1.3E-09        | <i>degP</i>        |
| WP_001157540.1    | 2.62654         | 0.00107        | <i>fetA</i>        |
| WP_001138581.1    | 2.55387         | 1E-07          | <i>speG</i>        |
| WP_000953361.1    | 2.54374         | 0.00156        | <i>nikA</i>        |
| WP_000828648.1    | 2.51459         | 0.00179        | <i>rmf</i>         |
| WP_001300708.1    | 2.48639         | 3.8E-08        | <i>dacC</i>        |
| WP_000491520.1    | 2.46353         | 0.00226        | <i>yedP</i>        |
| WP_001292679.1    | 2.30525         | 2.2E-06        | <i>mdoB</i>        |
| WP_000436922.1    | 2.27911         | 0.0053         | <i>ycbJ</i>        |
| WP_001059922.1    | 2.2013          | 7.8E-06        | <i>hypE</i>        |
| WP_000190854.1    | 2.1995          | 0.00078        | <i>ycgB</i>        |
| WP_001253696.1    | 2.17048         | 0.00875        | <i>envZ</i>        |
| WP_000394140.1    | 2.12624         | 1.9E-05        | <i>ansB</i>        |
| WP_000624375.1    | 2.11382         | 2.3E-05        | <i>folA</i>        |
| WP_000989419.1    | 2.09378         | 0.01246        | <i>astA</i>        |
| WP_000925969.1    | 4.0901          | 1.7E-06        | <i>ldtD</i>        |
| WP_000459630.1    | 2.08903         | 0.01273        | <i>tatD</i>        |
| WP_001336277.1    | 2.05056         | 1.2E-05        | <i>bglA</i>        |
| WP_001297409.1    | 2.03771         | 0.01611        | <i>tadA</i>        |
| WP_000735412.1    | 2.01658         | 0.01775        | <i>phoQ</i>        |
| WP_000081588.1    | 2.01513         | 1.8E-05        | <i>rpoS</i>        |
| WP_001274963.1    | 2.00813         | 0.01845        | <i>pspB</i>        |
| WP_000426427.1    | 0.48755         | 5.6E-07        | <i>dsdA</i>        |
| WP_000845104.1    | 0.47602         | 2.3E-07        | <i>asnA</i>        |

|                |         |         |                         |
|----------------|---------|---------|-------------------------|
| WP_000037608.1 | 0.47527 | 2E-05   | <i>yhbO</i>             |
| WP_001350521.1 | 0.46479 | 1.1E-05 | <i>yedQ</i>             |
| WP_000758655.1 | 0.46019 | 8.4E-06 | <i>ygdR</i>             |
| WP_000178044.1 | 0.4483  | 4.2E-06 | <i>mliC</i>             |
| WP_001300387.1 | 0.44345 | 9.6E-05 | <i>garK</i>             |
| WP_000890001.1 | 0.42062 | 6.7E-07 | <i>truC</i>             |
| WP_001308392.1 | 0.41722 | 9.2E-13 | <i>ivy</i>              |
| WP_001112301.1 | 0.41315 | 4E-07   | <i>galP</i>             |
| WP_001045689.1 | 0.40299 | 1.3E-05 | <i>sbp</i>              |
| WP_000646173.1 | 0.36176 | 1.1E-06 | <i>ybdR</i>             |
| WP_000498253.1 | 0.34248 | 9.8E-14 | <i>osmB</i>             |
| WP_000430057.1 | 0.34202 | 7.6E-10 | <i>fiu</i>              |
| WP_000761225.1 | 0.32266 | 8.8E-11 | <i>malS</i>             |
| WP_001309184.1 | 0.3172  | 1.6E-15 | <i>nanM</i>             |
| AIN31628.1     | 0.22799 | 2.4E-17 | <i>BW25113_1171</i>     |
| WP_000458809.1 | 0.2195  | 3.6E-18 | <i>hcp</i>              |
| WP_000281320.1 | 0.21767 | 2.3E-18 | <i>ygaC</i>             |
| WP_000868187.1 | 0.2058  | 9.9E-40 | <i>rpmJ</i>             |
| WP_001295684.1 | 0.19484 | 8.7E-30 | <i>ydeN</i>             |
| WP_000459379.1 | 0.14779 | 6.8E-20 | <i>malY</i>             |
| WP_000726974.1 | 0.08873 | 8.6E-44 | <i>ymgG</i>             |
| WP_000990333.1 | 0.0831  | 4.2E-46 | <i>amiB</i>             |
| WP_001295734.1 | 0.07192 | 2.2E-51 | <i>nanC</i>             |
| WP_000681354.1 | 0.57528 | 0.00779 | <i>nhaA</i>             |
| WP_001166395.1 | 0.72617 | 0.02402 | <i>ispH</i>             |
| WP_000597260.1 | 0.75275 | 0.03661 | <i>carA</i>             |
| WP_000736007.1 | 0.61402 | 0.01873 | <i>mutT</i>             |
| WP_000124438.1 | 0.69599 | 0.00576 | <i>fhuA</i>             |
| WP_001158931.1 | 0.61302 | 0.01834 | <i>fhuC</i>             |
| WP_000845394.1 | 1.8128  | 0.04469 | <i>clcA</i>             |
| WP_001291990.1 | 0.73816 | 0.02397 | <i>gpt</i>              |
| WP_001019920.1 | 0.61516 | 0.00524 | <i>DXE50_03530</i>      |
| WP_001102108.1 | 0.65099 | 0.01359 | <i>KXD89_16980</i>      |
| WP_000023927.1 | 0.63207 | 0.00837 | <i>ECMP0215528_0369</i> |
| WP_000052206.1 | 1.4751  | 0.02913 | <i>prpB</i>             |
| WP_001275859.1 | 1.52746 | 0.00731 | <i>HMPREF1599_03159</i> |
| WP_000413677.1 | 0.7623  | 0.04746 | <i>ddl</i>              |
| WP_001295332.1 | 1.64166 | 0.03482 | <i>psiF</i>             |
| WP_001295328.1 | 0.64444 | 0.00063 | <i>DXE50_04210</i>      |
| WP_001326929.1 | 0.6311  | 0.0264  | <i>KXD89_16745</i>      |
| WP_000844874.1 | 0.64375 | 0.03352 | <i>priC</i>             |
| WP_000738500.1 | 1.45019 | 0.01722 | <i>bor</i>              |
| WP_001201845.1 | 1.42015 | 0.02377 | <i>ompT</i>             |
| WP_001224604.1 | 1.62802 | 0.03801 | <i>KXD89_15970</i>      |
| WP_000381303.1 | 0.58105 | 0.00896 | <i>A1UI_00656</i>       |
| WP_000278509.1 | 1.75096 | 0.00052 | <i>A1UI_00672</i>       |
| WP_000503931.1 | 1.94949 | 0.00445 | <i>tatE</i>             |
| WP_000271153.1 | 1.86486 | 0.00043 | <i>nagA</i>             |

|                |         |         |                         |
|----------------|---------|---------|-------------------------|
| WP_001113989.1 | 0.6236  | 0.02278 | <i>nei</i>              |
| WP_000254365.1 | 0.74511 | 0.03761 | <i>sdhD</i>             |
| WP_000568275.1 | 0.66499 | 0.00418 | <i>DXE50_05885</i>      |
| WP_000053415.1 | 0.65211 | 0.0009  | <i>galK</i>             |
| WP_000767389.1 | 1.55538 | 0.01297 | <i>ECMP0215528_0917</i> |
| WP_000100800.1 | 1.93417 | 5.2E-05 | <i>dps</i>              |
| WP_001295296.1 | 1.5718  | 0.0044  | <i>ompX</i>             |
| WP_000815337.1 | 1.42197 | 0.04861 | <i>poxB</i>             |
| WP_001295343.1 | 0.67762 | 0.00625 | <i>lolA</i>             |
| WP_000850303.1 | 1.61106 | 0.04235 | <i>dmsA</i>             |
| WP_000165879.1 | 1.44322 | 0.01857 | <i>A1UI_00969</i>       |
| WP_000977920.1 | 0.73533 | 0.02199 | <i>ompF</i>             |
| WP_000048252.1 | 1.60609 | 0.04371 | <i>yccX</i>             |
| WP_001019197.1 | 0.60146 | 0.00349 | <i>DXE50_07850</i>      |
| WP_000420621.1 | 1.42312 | 0.04808 | <i>cbpA</i>             |
| WP_001151437.1 | 1.61626 | 0.00262 | <i>wrbA</i>             |
| AIN31510.1     | 1.80798 | 0.04566 | -                       |
| WP_001144615.1 | 0.55664 | 0.00077 | <i>trhO</i>             |
| pdb 6H58 00    | 0.73734 | 0.02338 | -                       |
| WP_000800153.1 | 0.55094 | 0.00415 | <i>bhsA</i>             |
| WP_000284280.1 | 1.89919 | 0.00628 | <i>KXD89_12840</i>      |
| WP_000702650.1 | 1.40496 | 0.02791 | <i>narH</i>             |
| WP_000718995.1 | 0.69111 | 0.00478 | <i>galU</i>             |
| WP_001360141.1 | 0.63673 | 0.0294  | <i>tonB</i>             |
| WP_001056490.1 | 1.64087 | 0.035   | <i>KXD89_12400</i>      |
| WP_001298828.1 | 0.50575 | 9.1E-05 | <i>hslJ</i>             |
| WP_001163872.1 | 1.35219 | 0.04805 | <i>patD</i>             |
| WP_000841554.1 | 1.5223  | 0.01819 | <i>DXE50_16450</i>      |
| WP_000246019.1 | 1.70277 | 0.02342 | <i>gadC</i>             |
| WP_000358930.1 | 1.77542 | 0.01448 | <i>O3K_13030</i>        |
| WP_000257409.1 | 0.64259 | 0.03281 | <i>glsB</i>             |
| WP_000214712.1 | 1.386   | 0.03402 | <i>ydfZ</i>             |
| WP_001300836.1 | 1.85322 | 0.03727 | <i>A1UI_01776</i>       |
| WP_001043339.1 | 1.75819 | 0.00047 | <i>A1UI_01805</i>       |
| WP_000483353.1 | 1.47956 | 0.01249 | <i>hdhA</i>             |
| WP_001296943.1 | 0.55992 | 5.1E-05 | <i>slyA</i>             |
| WP_000069375.1 | 0.69236 | 0.00502 | <i>ppsA</i>             |
| WP_001154168.1 | 1.47744 | 0.02847 | <i>btuE</i>             |
| WP_000267650.1 | 1.60056 | 0.00809 | <i>DXE50_14915</i>      |
| WP_000077872.1 | 1.40442 | 0.02807 | <i>katE</i>             |
| WP_000994973.1 | 1.86296 | 0.03567 | <i>astB</i>             |
| WP_000081983.1 | 1.56581 | 0.00471 | <i>astC</i>             |
| WP_001019882.1 | 1.48369 | 0.01193 | <i>DXE50_14615</i>      |
| WP_000394983.1 | 0.56835 | 0.00655 | <i>DXE50_14440</i>      |
| WP_000010115.1 | 0.50815 | 0.00115 | <i>rlmA</i>             |
| WP_000916763.1 | 0.70901 | 0.0478  | <i>DXE50_14305</i>      |
| WP_000936927.1 | 0.61509 | 0.01915 | <i>ptrB</i>             |
| WP_001350516.1 | 1.512   | 0.02018 | <i>yebF</i>             |

|                |         |         |                  |
|----------------|---------|---------|------------------|
| WP_000891621.1 | 1.70638 | 0.00258 | A1UI_02070       |
| WP_001245695.1 | 1.59433 | 0.00864 | amyA             |
| WP_000740106.1 | 1.38884 | 0.03303 | msrP             |
| WP_001350529.1 | 1.60797 | 0.0432  | KXD89_08150      |
| WP_000490679.1 | 0.75665 | 0.04077 | DXE50_12405      |
| WP_000182899.1 | 0.76364 | 0.04917 | gatA             |
| WP_000153067.1 | 1.43572 | 0.04266 | O3K_08910        |
| WP_000422182.1 | 0.67197 | 0.02223 | yojI             |
| WP_000566471.1 | 1.78703 | 0.0134  | ECMP0215528_2665 |
| WP_000748271.1 | 1.40828 | 0.02695 | A1UI_02525       |
| WP_000991370.1 | 0.50596 | 9.2E-05 | evgA             |
| WP_000497400.1 | 0.6686  | 0.0019  | A1UI_02594       |
| WP_000021036.1 | 0.50089 | 0.0009  | cysA             |
| WP_001003709.1 | 1.65615 | 0.00163 | tal              |
| WP_000087280.1 | 1.49552 | 0.0238  | WG3_03045        |
| WP_001300814.1 | 0.71333 | 0.01732 | A1UI_02650       |
| WP_000133592.1 | 1.66697 | 0.00143 | pepB             |
| WP_000883122.1 | 0.71352 | 0.0174  | hmp              |
| WP_000986023.1 | 0.60834 | 0.01661 | acpS             |
| WP_000178456.1 | 1.47859 | 0.01263 | raiA             |
| WP_001203437.1 | 1.61073 | 0.04244 | bamE             |
| WP_000271909.1 | 1.38588 | 0.03406 | lhgO             |
| WP_000522415.1 | 1.59041 | 0.00354 | kbp              |
| WP_000777969.1 | 0.5006  | 0.00089 | nrdF             |
| WP_001199973.1 | 1.87674 | 0.00037 | queE             |
| WP_000626422.1 | 0.68335 | 0.00352 | sdaB             |
| WP_000016907.1 | 1.98765 | 0.00342 | DXE50_18860      |
| WP_001326497.1 | 0.69386 | 0.01014 | loiP             |
| WP_000994920.1 | 0.64399 | 0.03367 | yggU             |
| WP_000013149.1 | 1.40691 | 0.02734 | dkgA             |
| WP_000712658.1 | 1.74598 | 0.00055 | ygiW             |
| WP_000735278.1 | 1.70086 | 0.00095 | tolC             |
| WP_000046281.1 | 0.68739 | 0.0084  | A1UI_03332       |
| WP_001125331.1 | 0.72625 | 0.02406 | DXE50_20220      |
| WP_001066494.1 | 0.69351 | 0.03524 | A1UI_03348       |
| WP_000121433.1 | 1.42144 | 0.04885 | A1UI_03359       |
| WP_000031415.1 | 1.69309 | 0.00104 | ECMP0215528_3607 |
| WP_000785722.1 | 0.52762 | 8.2E-06 | DXE50_20455      |
| WP_000548347.1 | 0.56752 | 0.00642 | tdcB             |
| AIN33471.1     | 0.59149 | 0.00024 | -                |
| WP_001058209.1 | 0.58686 | 0.0022  | garL             |
| WP_001273753.1 | 0.64948 | 0.00247 | garD             |
| pdb 6H58 oo    | 0.74589 | 0.03012 | -                |
| WP_001300352.1 | 0.6827  | 0.00343 | gltB             |
| WP_000081674.1 | 0.67112 | 0.0051  | gltD             |
| WP_000979882.1 | 0.61511 | 0.00523 | ECMP0215528_3729 |
| WP_000209011.1 | 0.72079 | 0.02099 | nanK             |
| WP_000224714.1 | 0.6379  | 0.00045 | nanA             |

|                |         |         |                  |
|----------------|---------|---------|------------------|
| WP_000695690.1 | 1.98787 | 0.02023 | O3K_02775        |
| WP_000354622.1 | 1.38054 | 0.03599 | <i>accB</i>      |
| WP_001219652.1 | 1.90568 | 0.02941 | <i>dusB</i>      |
| WP_001157751.1 | 1.44043 | 0.01914 | <i>ompR</i>      |
| WP_000856737.1 | 1.65146 | 0.03269 | <i>greB</i>      |
| WP_000444342.1 | 0.69685 | 0.01104 | <i>malQ</i>      |
| WP_000081909.1 | 0.56447 | 5.3E-06 | <i>malP</i>      |
| WP_000906961.1 | 0.64756 | 0.00231 | <i>malT</i>      |
| WP_001283723.1 | 1.49657 | 0.02356 | <i>glgB</i>      |
| WP_000108330.1 | 0.73424 | 0.02921 | <i>gntK</i>      |
| WP_001350553.1 | 1.88711 | 0.00033 | <i>slp</i>       |
| WP_000372240.1 | 1.60953 | 0.00283 | ECMP0215528_4059 |
| WP_001296794.1 | 1.9492  | 0.02414 | ECMP0215528_4067 |
| WP_001295233.1 | 0.66721 | 0.01996 | HMPREF1589_01249 |
| pdb 6H58 11    | 0.62209 | 0.0002  | -                |
| WP_001243431.1 | 0.65765 | 0.00327 | <i>ibpB</i>      |
| WP_001243437.1 | 0.56797 | 6.8E-06 | <i>ibpA</i>      |
| WP_001291268.1 | 1.6522  | 0.00466 | <i>yieF</i>      |
| WP_000763724.1 | 0.72424 | 0.02289 | EL76_4667        |
| WP_000281668.1 | 0.66034 | 0.04499 | A1UI_04118       |
| WP_000591375.1 | 0.7014  | 0.00704 | -                |
| WP_000940106.1 | 0.71048 | 0.04915 | DXE50_25690      |
| WP_001252058.1 | 0.60827 | 0.01659 | <i>malG</i>      |
| WP_001297290.1 | 0.55203 | 0.00064 | <i>malF</i>      |
| WP_000695387.1 | 0.55722 | 3.1E-06 | <i>malE</i>      |
| WP_000179165.1 | 0.6329  | 0.00035 | <i>malK</i>      |
| WP_000973663.1 | 0.58528 | 2.2E-05 | <i>lamB</i>      |
| WP_001326641.1 | 0.67306 | 0.0023  | <i>malM</i>      |
| WP_000002907.1 | 0.70491 | 0.04419 | DXE50_25955      |
| WP_001014565.1 | 1.89183 | 0.0066  | EKN05_018200     |
| WP_001131339.1 | 1.81878 | 0.04351 | HMPREF1602_03064 |
| WP_001298520.1 | 1.66727 | 0.00396 | HMPREF1599_00791 |
| WP_001295074.1 | 1.62661 | 0.00232 | <i>lysS</i>      |
| WP_001350567.1 | 1.95734 | 0.02326 | KXD89_19795      |
| WP_000853753.1 | 0.72311 | 0.01493 | <i>fbp</i>       |
| WP_001336303.1 | 0.67935 | 0.00299 | G711_01352       |
| WP_001407733.1 | 0.75656 | 0.04067 | <i>treB</i>      |
| WP_001181307.1 | 0.59136 | 0.01141 | G711_01354       |
| WP_000148581.1 | 0.71385 | 0.01095 | <i>pyrI</i>      |
| WP_000013046.1 | 0.65255 | 0.00092 | <i>pyrB</i>      |
| WP_000583469.1 | 0.75447 | 0.03841 | EKN05_017700     |
| WP_001309160.1 | 1.69988 | 0.02386 | G894_04371       |
| WP_000611568.1 | 0.68585 | 0.00802 | A13A_04926       |
| WP_000879155.1 | 0.56818 | 0.00117 | HMPREF1599_03219 |
| WP_000188283.1 | 0.51124 | 2.9E-06 | HMPREF1599_03218 |
| WP_000563040.1 | 0.60878 | 0.01677 | G925_04733       |
| WP_001338221.1 | 0.66377 | 0.0477  | O3K_21575        |
| WP_001264707.1 | 0.81635 | 0.1628  | A13A_05080       |

|                |         |         |                         |
|----------------|---------|---------|-------------------------|
| WP_000241662.1 | 0.74519 | 0.09024 | <i>thrB</i>             |
| WP_000781074.1 | 0.95181 | 0.93496 | <i>thrC</i>             |
| WP_000906197.1 | 1.03389 | 0.88064 | <i>yaaA</i>             |
| WP_000130185.1 | 0.92334 | 0.73266 | <i>tal</i>              |
| WP_001295414.1 | 0.97072 | 0.79965 | <i>EKN05_016655</i>     |
| WP_000516135.1 | 0.84478 | 0.27015 | <i>dnaK</i>             |
| WP_001118476.1 | 0.95135 | 0.93171 | <i>dnaJ</i>             |
| pdb 6H58 tt    | 0.88207 | 0.46355 | -                       |
| WP_000767329.1 | 0.91887 | 0.62089 | <i>ribF</i>             |
| WP_001286857.1 | 0.90312 | 0.59533 | <i>ileS</i>             |
| WP_000004655.1 | 0.84705 | 0.23238 | <i>fkpB</i>             |
| WP_001239142.1 | 1.08333 | 0.67653 | <i>rihC</i>             |
| WP_000543604.1 | 1.21412 | 0.28519 | <i>dapB</i>             |
| WP_001126348.1 | 0.77589 | 0.06712 | <i>carB</i>             |
| WP_000377098.1 | 1.17225 | 0.60238 | <i>kefC</i>             |
| WP_000257192.1 | 1.05322 | 0.79791 | <i>apaH</i>             |
| WP_000610901.1 | 1.31047 | 0.36755 | <i>apaG</i>             |
| WP_001065381.1 | 0.88888 | 0.38893 | <i>rsmA</i>             |
| WP_000241277.1 | 0.88659 | 0.48433 | <i>pdxA</i>             |
| WP_000800457.1 | 0.98514 | 0.88549 | <i>surA</i>             |
| WP_000746151.1 | 1.04462 | 0.62887 | <i>lptD</i>             |
| WP_001200579.1 | 1.13847 | 0.58471 | <i>djIA</i>             |
| WP_000525176.1 | 0.85565 | 0.44053 | <i>rluA</i>             |
| WP_001117011.1 | 0.92429 | 0.7393  | <i>rapA</i>             |
| WP_001300811.1 | 0.9002  | 0.57628 | <i>araC</i>             |
| WP_001301364.1 | 1.20395 | 0.4322  | <i>HMPREF1589_03362</i> |
| WP_000818228.1 | 0.85399 | 0.25514 | <i>leuD</i>             |
| WP_001140652.1 | 0.90179 | 0.44603 | <i>leuC</i>             |
| WP_000042353.1 | 1.04881 | 0.81646 | <i>leuB</i>             |
| WP_000082850.1 | 0.93193 | 0.5925  | <i>leuA</i>             |
| WP_001115472.1 | 0.68064 | 0.0628  | <i>A1UI_04836</i>       |
| WP_001295534.1 | 0.8865  | 0.48395 | <i>A1UI_04837</i>       |
| WP_001300383.1 | 0.94017 | 0.74674 | <i>A1UI_04838</i>       |
| WP_000762401.1 | 0.92887 | 0.77145 | <i>cra</i>              |
| WP_001295533.1 | 1.13733 | 0.67605 | <i>mraZ</i>             |
| WP_000970479.1 | 0.96734 | 0.78113 | <i>rsmH</i>             |
| WP_000625658.1 | 0.87573 | 0.50867 | <i>ftsL</i>             |
| WP_000642196.1 | 1.09243 | 0.71129 | <i>ftsI</i>             |
| WP_000775093.1 | 0.95324 | 0.94522 | <i>murE</i>             |
| WP_000626685.1 | 0.98404 | 0.87311 | <i>murF</i>             |
| WP_000964131.1 | 1.12282 | 0.70836 | <i>mraY</i>             |
| WP_000796481.1 | 1.01371 | 0.97007 | <i>murD</i>             |
| WP_001295532.1 | 0.83355 | 0.37032 | <i>ftsW</i>             |
| WP_000016560.1 | 1.20449 | 0.43107 | <i>murG</i>             |
| WP_001096049.1 | 1.01332 | 0.97184 | <i>murC</i>             |
| WP_000130056.1 | 1.01358 | 0.97067 | <i>ddl</i>              |
| WP_000075748.1 | 0.75121 | 0.16423 | <i>ftsQ</i>             |
| WP_000588474.1 | 0.94555 | 0.66349 | <i>ftsA</i>             |

|                |         |         |                         |
|----------------|---------|---------|-------------------------|
| WP_000462776.1 | 1.0943  | 0.45192 | <i>ftsZ</i>             |
| WP_000595482.1 | 1.48293 | 0.18594 | <i>lpxC</i>             |
| WP_000905789.1 | 0.8173  | 0.1658  | <i>secA</i>             |
| WP_000005042.1 | 1.12315 | 0.70761 | <i>yacG</i>             |
| WP_001194734.1 | 0.89325 | 0.51151 | <i>zapD</i>             |
| WP_001269520.1 | 0.85384 | 0.43456 | <i>coaE</i>             |
| WP_001217338.1 | 0.95184 | 0.93517 | <i>guaC</i>             |
| WP_001135174.1 | 0.93232 | 0.59449 | <i>nadC</i>             |
| WP_000923721.1 | 1.01528 | 0.97549 | <i>ampD</i>             |
| WP_000172005.1 | 0.99652 | 0.96341 | <i>ampE</i>             |
| WP_000331776.1 | 0.99487 | 0.9684  | <i>pdhR</i>             |
| WP_000003820.1 | 0.91737 | 0.69133 | <i>aceE</i>             |
| WP_000963518.1 | 0.97162 | 0.94895 | <i>aceF</i>             |
| WP_000102485.1 | 0.90815 | 0.62873 | <i>lpdA</i>             |
| WP_001307570.1 | 1.01333 | 0.75858 | <i>acnB</i>             |
| WP_000384306.1 | 1.26451 | 0.4358  | <i>yacL</i>             |
| WP_000734287.1 | 0.9611  | 0.74704 | <i>speD</i>             |
| WP_000818411.1 | 1.00619 | 0.99511 | <i>speE</i>             |
| WP_001295568.1 | 0.80198 | 0.28028 | <i>DXE50_02840</i>      |
| WP_001189647.1 | 1.33372 | 0.2214  | <i>A1UI_04880</i>       |
| WP_001306211.1 | 0.9638  | 0.82485 | <i>HMPREF1595_04252</i> |
| WP_000683335.1 | 0.76557 | 0.05846 | <i>DXE50_02855</i>      |
| WP_000651599.1 | 0.94031 | 0.85274 | <i>DXE50_02860</i>      |
| WP_000150637.1 | 0.98231 | 0.86352 | <i>DXE50_02865</i>      |
| WP_000621515.1 | 1.00898 | 0.97557 | <i>panD</i>             |
| WP_000905383.1 | 1.03044 | 0.89572 | <i>panC</i>             |
| WP_000805497.1 | 1.10127 | 0.43012 | <i>panB</i>             |
| WP_000215139.1 | 0.84768 | 0.41458 | <i>folK</i>             |
| WP_010723084.1 | 0.76814 | 0.12839 | <i>pcnB</i>             |
| WP_001155227.1 | 1.14991 | 0.29874 | <i>dksA</i>             |
| WP_000396036.1 | 0.90082 | 0.59857 | <i>sfsA</i>             |
| WP_001350480.1 | 0.9749  | 0.87627 | <i>hrpB</i>             |
| WP_000918162.1 | 0.96317 | 0.98922 | <i>mrcB</i>             |
| WP_001310529.1 | 0.86023 | 0.45571 | <i>HMPREF1602_04663</i> |
| WP_001295564.1 | 1.38027 | 0.07156 | <i>erpA</i>             |
| WP_000689844.1 | 0.93655 | 0.8259  | <i>mtnN</i>             |
| WP_000057073.1 | 1.27107 | 0.42547 | <i>dgt</i>              |
| WP_000272188.1 | 1.12433 | 0.52901 | <i>yaeH</i>             |
| WP_001186650.1 | 0.92808 | 0.76589 | <i>dapD</i>             |
| WP_001094586.1 | 0.88223 | 0.36101 | <i>glnD</i>             |
| WP_001018194.1 | 0.85153 | 0.30086 | <i>map</i>              |
| pdb 7OE0 B     | 0.94253 | 0.86861 | -                       |
| WP_000818114.1 | 0.85373 | 0.31128 | <i>tsf</i>              |
| WP_000224573.1 | 0.87271 | 0.4098  | <i>pyrH</i>             |
| WP_000622418.1 | 0.98028 | 0.90812 | <i>frf</i>              |
| WP_000811923.1 | 0.78308 | 0.2328  | <i>dxr</i>              |
| WP_001295562.1 | 1.05958 | 0.85999 | <i>ispU</i>             |
| WP_000922446.1 | 1.46333 | 0.2015  | <i>cdsA</i>             |

|                |         |         |                         |
|----------------|---------|---------|-------------------------|
| WP_001295561.1 | 1.07821 | 0.7534  | <i>rseP</i>             |
| WP_001240896.1 | 0.96483 | 0.9813  | <i>bamA</i>             |
| WP_000758956.1 | 1.17448 | 0.24545 | <i>skp</i>              |
| WP_001139279.1 | 0.91187 | 0.49311 | <i>lpxD</i>             |
| WP_000210739.1 | 0.9834  | 0.89354 | <i>fabZ</i>             |
| WP_000565966.1 | 1.09192 | 0.64385 | <i>lpxA</i>             |
| WP_000139654.1 | 1.46351 | 0.20135 | <i>lpxB</i>             |
| WP_000569430.1 | 0.94992 | 0.78421 | <i>rnhB</i>             |
| WP_001294757.1 | 1.13581 | 0.6794  | <i>dnaE</i>             |
| WP_000055741.1 | 0.96903 | 0.96124 | <i>accA</i>             |
| WP_001020973.1 | 1.50739 | 0.16806 | <i>ldcC</i>             |
| WP_000901099.1 | 1.01331 | 0.96099 | <i>KXD89_17755</i>      |
| WP_000176549.1 | 1.14245 | 0.6649  | <i>tilS</i>             |
| AIN30718.1     | 1.3214  | 0.23674 | -                       |
| WP_000417058.1 | 1.33643 | 0.21813 | <i>yaeP</i>             |
| WP_001185290.1 | 0.95263 | 0.79466 | <i>DXE50_03195</i>      |
| WP_000239163.1 | 1.49961 | 0.08476 | <i>nlpE</i>             |
| WP_001260717.1 | 0.90438 | 0.60362 | <i>proS</i>             |
| WP_000094011.1 | 1.01606 | 0.97338 | <i>tsaA</i>             |
| WP_001202329.1 | 0.86006 | 0.27613 | <i>rcsF</i>             |
| WP_000874226.1 | 1.01418 | 0.75491 | <i>WG3_00475</i>        |
| WP_000594006.1 | 1.05222 | 0.83375 | <i>metN</i>             |
| WP_001140187.1 | 0.75849 | 0.11119 | <i>gmhB</i>             |
| WP_000997010.1 | 0.74602 | 0.09145 | <i>dkgB</i>             |
| WP_000648572.1 | 1.52717 | 0.15476 | <i>KXD89_17630</i>      |
| WP_001230983.1 | 1.47639 | 0.19101 | <i>yafD</i>             |
| WP_001052715.1 | 1.0794  | 0.74984 | <i>gloB</i>             |
| WP_000917883.1 | 0.85327 | 0.43271 | <i>rnhA</i>             |
| WP_001340895.1 | 0.92192 | 0.67724 | <i>dnaQ</i>             |
| WP_001118036.1 | 1.31126 | 0.25003 | <i>yafV</i>             |
| WP_000973083.1 | 1.04626 | 0.82732 | <i>A1UI_00324</i>       |
| WP_000284050.1 | 1.07233 | 0.52551 | <i>lpcA</i>             |
| WP_000333380.1 | 0.92693 | 0.69622 | <i>ECMP0215528_0302</i> |
| WP_000729703.1 | 1.27459 | 0.30345 | <i>dinJ</i>             |
| WP_001292994.1 | 0.95562 | 0.96221 | <i>pepD</i>             |
| WP_000189532.1 | 0.97586 | 0.82797 | <i>frsA</i>             |
| WP_000174689.1 | 1.13901 | 0.48164 | <i>crl</i>              |
| WP_001285288.1 | 0.96482 | 0.76734 | <i>proB</i>             |
| WP_000893278.1 | 1.08697 | 0.47563 | <i>proA</i>             |
| WP_000081352.1 | 1.38877 | 0.27179 | <i>A1UI_00392</i>       |
| WP_001136613.1 | 1.0884  | 0.65713 | <i>yagE</i>             |
| WP_000151261.1 | 0.99478 | 0.95679 | <i>yagF</i>             |
| WP_000406871.1 | 0.97042 | 0.86329 | <i>yagH</i>             |
| WP_001121657.1 | 1.0879  | 0.78998 | <i>kdgR_2</i>           |
| WP_000803998.1 | 0.66951 | 0.0525  | <i>rpmE2</i>            |
| AIN30811.1     | 1.17912 | 0.58857 | -                       |
| WP_001046307.1 | 1.27557 | 0.30191 | <i>KXD89_16970</i>      |
| WP_000370307.1 | 0.77926 | 0.07675 | <i>KXD89_16990</i>      |



|                |         |         |                         |
|----------------|---------|---------|-------------------------|
| WP_000089110.1 | 1.0248  | 0.92265 | <i>betB</i>             |
| WP_000665120.1 | 0.83231 | 0.36654 | <i>KZW89_19055</i>      |
| WP_000692754.1 | 1.30743 | 0.07473 | <i>A1UI_00416</i>       |
| WP_000691956.1 | 1.34921 | 0.09457 | <i>ECMP0215528_0390</i> |
| WP_001285927.1 | 1.4093  | 0.05475 | <i>prpC</i>             |
| WP_000076233.1 | 0.80794 | 0.29627 | <i>codB</i>             |
| WP_001301240.1 | 0.81402 | 0.1419  | <i>A1UI_00427</i>       |
| WP_000952503.1 | 0.83302 | 0.36868 | <i>A1UI_00428</i>       |
| WP_071843335.1 | 0.86787 | 0.41133 | -                       |
| WP_001301325.1 | 0.91205 | 0.64016 | <i>KXD89_17195</i>      |
| WP_001013499.1 | 0.84016 | 0.39072 | <i>mhpE</i>             |
| WP_001096705.1 | 0.99066 | 0.94907 | <i>DXE50_03945</i>      |
| WP_000419081.1 | 0.8602  | 0.38301 | <i>fghA</i>             |
| WP_000842106.1 | 0.9761  | 0.82925 | <i>frmA</i>             |
| WP_001141271.1 | 0.94179 | 0.72368 | <i>frmR</i>             |
| WP_001295337.1 | 1.15036 | 0.29769 | <i>hemB</i>             |
| WP_000092067.1 | 0.86177 | 0.46089 | <i>yaiW</i>             |
| WP_000792970.1 | 1.19231 | 0.33449 | <i>iraP</i>             |
| WP_001295331.1 | 1.20797 | 0.29849 | <i>proC</i>             |
| WP_000158159.1 | 1.19008 | 0.46177 | <i>yail</i>             |
| WP_001276420.1 | 0.75786 | 0.17732 | <i>DXE50_04100</i>      |
| WP_000941942.1 | 1.12122 | 0.63031 | <i>ppnP</i>             |
| WP_001298537.1 | 0.95101 | 0.69261 | <i>rdgC</i>             |
| WP_001219309.1 | 1.17446 | 0.49682 | <i>mak</i>              |
| WP_000698951.1 | 1.15614 | 0.63566 | <i>sbcC</i>             |
| WP_000113933.1 | 0.88531 | 0.47918 | <i>phoB</i>             |
| WP_000893623.1 | 1.03253 | 0.92972 | <i>phoR</i>             |
| WP_000149639.1 | 0.97558 | 0.88318 | <i>brnQ</i>             |
| WP_001295329.1 | 1.26436 | 0.43603 | <i>proY</i>             |
| AIN30902.1     | 1.22995 | 0.49346 | -                       |
| WP_001266503.1 | 1.11651 | 0.55543 | <i>queA</i>             |
| WP_000667319.1 | 0.81228 | 0.13794 | <i>tgt</i>              |
| WP_000007629.1 | 1.03277 | 0.67646 | <i>yajC</i>             |
| WP_000934822.1 | 0.90534 | 0.61001 | <i>secD</i>             |
| WP_000046637.1 | 0.93235 | 0.59466 | <i>secF</i>             |
| WP_000974813.1 | 0.91956 | 0.62391 | <i>DXE50_04205</i>      |
| WP_000543535.1 | 1.02972 | 0.90644 | <i>nrdR</i>             |
| WP_001150457.1 | 0.97823 | 0.89166 | <i>ribD</i>             |
| WP_001021161.1 | 0.77525 | 0.06607 | <i>ribH</i>             |
| WP_000801125.1 | 1.02127 | 0.93626 | <i>nusB</i>             |
| WP_000742109.1 | 0.91037 | 0.63389 | <i>thiL</i>             |
| WP_001199800.1 | 1.25965 | 0.20084 | <i>A1UI_00501</i>       |
| WP_000006797.1 | 0.91719 | 0.51878 | <i>dxs</i>              |
| WP_000347217.1 | 1.07218 | 0.77167 | <i>A1UI_00503</i>       |
| WP_001124935.1 | 0.8572  | 0.44564 | <i>xseB</i>             |
| WP_000668662.1 | 0.91794 | 0.52245 | <i>thiI</i>             |
| WP_001276305.1 | 0.90732 | 0.57071 | <i>A1UI_00506</i>       |
| WP_000705865.1 | 0.99262 | 0.95808 | <i>panE</i>             |

|                |         |         |                         |
|----------------|---------|---------|-------------------------|
| WP_001138904.1 | 0.91527 | 0.67691 | <i>yajQ</i>             |
| WP_000467180.1 | 0.8902  | 0.51282 | <i>DXE50_04315</i>      |
| WP_001239436.1 | 0.80551 | 0.13099 | <i>WG3_00715</i>        |
| WP_001295326.1 | 0.82911 | 0.20657 | <i>DXE50_04330</i>      |
| WP_000973448.1 | 1.04105 | 0.84959 | <i>bolA</i>             |
| WP_001198386.1 | 0.88509 | 0.48161 | <i>tig</i>              |
| WP_000122253.1 | 1.02421 | 0.71203 | <i>clpP</i>             |
| WP_000130305.1 | 1.01767 | 0.73985 | <i>clpX</i>             |
| WP_001295325.1 | 1.05679 | 0.58207 | <i>lon</i>              |
| WP_001043542.1 | 0.96782 | 0.96701 | <i>hupB</i>             |
| WP_000969372.1 | 0.95293 | 0.94295 | <i>ppiD</i>             |
| WP_001194534.1 | 1.32241 | 0.23545 | <i>DXE50_04375</i>      |
| WP_000817220.1 | 0.8183  | 0.24674 | <i>queC</i>             |
| WP_000884589.1 | 0.66999 | 0.05291 | <i>DXE50_04395</i>      |
| WP_000075876.1 | 0.90277 | 0.45051 | <i>tesB</i>             |
| WP_000779842.1 | 0.92848 | 0.57496 | <i>KXD89_16535</i>      |
| WP_000136192.1 | 0.85119 | 0.24581 | <i>DXE50_04450</i>      |
| WP_000102564.1 | 0.88623 | 0.48285 | <i>DXE50_04455</i>      |
| WP_001291435.1 | 1.22386 | 0.39226 | <i>hha</i>              |
| WP_001132469.1 | 0.86583 | 0.37235 | <i>DXE50_04470</i>      |
| WP_001295324.1 | 0.9309  | 0.78585 | <i>acrA</i>             |
| WP_000101737.1 | 1.18917 | 0.56878 | <i>acrR</i>             |
| WP_000177732.1 | 1.04514 | 0.85632 | <i>mscK</i>             |
| WP_000051153.1 | 1.41717 | 0.13831 | <i>rsmS</i>             |
| WP_000127356.1 | 1.08228 | 0.49127 | <i>apt</i>              |
| WP_000122013.1 | 1.18608 | 0.3497  | <i>dnaX</i>             |
| WP_000467098.1 | 0.86183 | 0.35151 | <i>ybaB</i>             |
| WP_001195025.1 | 0.73702 | 0.1384  | <i>recR</i>             |
| WP_000678201.1 | 0.87125 | 0.40167 | <i>htpG</i>             |
| WP_001220233.1 | 0.9193  | 0.70463 | <i>adk</i>              |
| WP_001250103.1 | 1.31181 | 0.36571 | <i>hemH</i>             |
| WP_000671574.1 | 0.90065 | 0.44081 | <i>gsk</i>              |
| WP_000546237.1 | 0.79217 | 0.17891 | <i>A1UI_00561</i>       |
| WP_001251608.1 | 1.14813 | 0.65265 | <i>A1UI_00562</i>       |
| WP_000771748.1 | 1.31695 | 0.06813 | <i>A13A_00461</i>       |
| WP_000186631.1 | 1.0167  | 0.94963 | <i>ybaK</i>             |
| WP_000806442.1 | 1.19667 | 0.55433 | <i>A13A_00465</i>       |
| WP_000083955.1 | 1.39245 | 0.06401 | <i>copA</i>             |
| WP_001026747.1 | 0.94472 | 0.76423 | <i>cueR</i>             |
| WP_000904502.1 | 1.66928 | 0.08429 | <i>DXE50_04660</i>      |
| WP_001300573.1 | 0.8644  | 0.36483 | <i>cnoX</i>             |
| WP_000148959.1 | 1.26231 | 0.43929 | <i>ybbO</i>             |
| WP_001295836.1 | 1.08667 | 0.72819 | <i>ECMP0215528_0556</i> |
| WP_001110573.1 | 1.10276 | 0.60391 | <i>DXE50_04690</i>      |
| WP_000141275.1 | 0.99616 | 0.94    | <i>allR</i>             |
| WP_001333621.1 | 1.26855 | 0.42941 | <i>glxK</i>             |
| WP_000815571.1 | 0.98379 | 0.91472 | <i>purK</i>             |
| WP_001295318.1 | 0.97671 | 0.88462 | <i>purE</i>             |

|                |         |         |                    |
|----------------|---------|---------|--------------------|
| WP_000255997.1 | 0.95387 | 0.94966 | <i>ppiB</i>        |
| WP_000912385.1 | 0.83895 | 0.24523 | <i>cysS</i>        |
| WP_000190288.1 | 0.95974 | 0.73966 | <i>ybcJ</i>        |
| WP_000729160.1 | 0.90849 | 0.47709 | <i>folD</i>        |
| WP_000662357.1 | 0.85891 | 0.4513  | <i>nfrA</i>        |
| WP_000770953.1 | 1.08868 | 0.78811 | <i>cusR</i>        |
| WP_000786319.1 | 1.04275 | 0.90307 | <i>pheP</i>        |
| WP_001153148.1 | 0.79327 | 0.25778 | <i>DXE50_05095</i> |
| WP_000351487.1 | 0.98597 | 0.88163 | <i>nfsB</i>        |
| WP_001130654.1 | 1.65611 | 0.08926 | <i>KXD89_15900</i> |
| WP_001034943.1 | 0.83456 | 0.19473 | <i>fepA</i>        |
| WP_000026812.1 | 0.89234 | 0.50773 | <i>entE</i>        |
| WP_001007138.1 | 0.95315 | 0.77574 | <i>A1UI_00658</i>  |
| WP_000347651.1 | 0.95155 | 0.76835 | <i>A1UI_00659</i>  |
| WP_001043156.1 | 1.28254 | 0.16694 | <i>A1UI_00661</i>  |
| WP_000913829.1 | 0.96879 | 0.84797 | <i>dsbG</i>        |
| WP_000052796.1 | 0.95778 | 0.97761 | <i>ahpC</i>        |
| WP_000887629.1 | 0.89024 | 0.5131  | <i>ahpF</i>        |
| WP_000089731.1 | 1.07847 | 0.69542 | <i>rnk</i>         |
| WP_000643397.1 | 0.85403 | 0.36092 | <i>A1UI_00676</i>  |
| WP_000062457.1 | 0.6866  | 0.0689  | <i>citG</i>        |
| WP_000034825.1 | 0.77316 | 0.06274 | <i>cspE</i>        |
| WP_000042632.1 | 0.8012  | 0.1145  | <i>lipA</i>        |
| WP_000284027.1 | 0.72996 | 0.06993 | <i>lipB</i>        |
| WP_000850550.1 | 1.02976 | 0.8987  | <i>ybeD</i>        |
| WP_001092082.1 | 1.0264  | 0.70283 | <i>dacA</i>        |
| WP_001231430.1 | 1.11063 | 0.57586 | <i>rlpA</i>        |
| WP_000131719.1 | 0.91228 | 0.64102 | <i>mrdB</i>        |
| WP_000776191.1 | 1.14993 | 0.55567 | <i>mrdA</i>        |
| WP_000776104.1 | 1.04672 | 0.85127 | <i>rlmH</i>        |
| WP_001161664.1 | 0.89358 | 0.40928 | <i>rsfS</i>        |
| WP_000620535.1 | 0.92552 | 0.69086 | <i>EL76_3432</i>   |
| WP_001269673.1 | 0.99825 | 0.98388 | <i>lptE</i>        |
| WP_001340834.1 | 0.85059 | 0.29644 | <i>leuS</i>        |
| WP_001044880.1 | 1.33978 | 0.05441 | <i>DXE50_05445</i> |
| WP_001207520.1 | 0.95386 | 0.70792 | <i>rihA</i>        |
| WP_001177086.1 | 1.26484 | 0.19269 | <i>gtI</i>         |
| WP_000853021.1 | 0.8868  | 0.48517 | <i>Int</i>         |
| WP_001278605.1 | 1.15629 | 0.42967 | <i>corC</i>        |
| WP_000084469.1 | 0.822   | 0.33589 | <i>ybeY</i>        |
| WP_001018040.1 | 0.89647 | 0.55225 | <i>ybeZ</i>        |
| WP_000162740.1 | 0.90816 | 0.62878 | <i>miaB</i>        |
| WP_000184541.1 | 0.76034 | 0.11435 | <i>A1UI_00729</i>  |
| WP_000337077.1 | 0.78125 | 0.0764  | <i>WG3_00959</i>   |
| WP_000153129.1 | 1.02039 | 0.94019 | <i>nagD</i>        |
| WP_000187594.1 | 1.119   | 0.54691 | <i>nagC</i>        |
| WP_001237072.1 | 0.78689 | 0.08864 | <i>nagB</i>        |
| WP_038432907.1 | 0.95675 | 0.72348 | -                  |

|                |         |         |                         |
|----------------|---------|---------|-------------------------|
| WP_001287154.1 | 0.91155 | 0.65155 | <i>glnS</i>             |
| WP_000131702.1 | 1.0407  | 0.64438 | <i>fur</i>              |
| WP_001018618.1 | 0.92645 | 0.75445 | <i>fldA</i>             |
| WP_001300829.1 | 0.99677 | 0.96438 | <i>DXE50_05640</i>      |
| WP_000773288.1 | 0.83029 | 0.18281 | <i>ybfF</i>             |
| WP_000848387.1 | 0.92375 | 0.55113 | <i>seqA</i>             |
| WP_001297249.1 | 1.06275 | 0.55995 | <i>A1UI_00749</i>       |
| WP_001310640.1 | 1.18424 | 0.57844 | <i>A1UI_00756</i>       |
| WP_000087939.1 | 0.9586  | 0.81767 | <i>kdpB</i>             |
| WP_000424924.1 | 1.13698 | 0.67682 | <i>DXE50_05690</i>      |
| WP_001053305.1 | 1.18345 | 0.57999 | <i>ECMP0215528_0806</i> |
| WP_000798871.1 | 1.12976 | 0.34885 | <i>DXE50_05710</i>      |
| WP_001188343.1 | 0.87204 | 0.42712 | <i>ECMP0215528_0810</i> |
| WP_000912724.1 | 1.08753 | 0.72565 | <i>pxpC</i>             |
| WP_000785834.1 | 0.99291 | 0.84971 | <i>gltA</i>             |
| AIN31197.1     | 0.84691 | 0.23193 | -                       |
| WP_000775540.1 | 0.98519 | 0.88526 | <i>sdhA</i>             |
| WP_001235254.1 | 1.03229 | 0.67843 | <i>A311_01246</i>       |
| WP_001181473.1 | 0.90967 | 0.63888 | <i>sucA</i>             |
| WP_000099823.1 | 0.9641  | 0.98479 | <i>WG3_01000</i>        |
| WP_001048602.1 | 1.04163 | 0.6407  | <i>sucC</i>             |
| WP_000025458.1 | 1.04193 | 0.63949 | <i>sucD</i>             |
| WP_000509902.1 | 0.81552 | 0.31731 | <i>mngR</i>             |
| WP_000884361.1 | 1.0365  | 0.66128 | <i>O3K_17975</i>        |
| WP_000034602.1 | 1.01232 | 0.98342 | <i>ybgE</i>             |
| WP_001098384.1 | 0.86827 | 0.4829  | <i>ybgC</i>             |
| WP_000131314.1 | 0.93008 | 0.58309 | <i>tolQ</i>             |
| WP_000090097.1 | 0.97218 | 0.87006 | <i>tolR</i>             |
| WP_000030637.1 | 0.9279  | 0.57199 | <i>tolA</i>             |
| WP_001295307.1 | 1.07866 | 0.50354 | <i>tolB</i>             |
| WP_001295306.1 | 1.00588 | 0.79132 | <i>pal</i>              |
| WP_000097571.1 | 0.96876 | 0.78892 | <i>cpoB</i>             |
| WP_000784351.1 | 1.52436 | 0.15659 | <i>DXE50_05990</i>      |
| WP_001109196.1 | 0.97545 | 0.8257  | <i>O3K_17900</i>        |
| WP_001295305.1 | 0.99301 | 0.84925 | <i>gpmA</i>             |
| WP_000931389.1 | 0.96119 | 0.99871 | <i>galM</i>             |
| WP_000191497.1 | 0.7629  | 0.05532 | <i>A1UI_00817</i>       |
| WP_001265438.1 | 0.84068 | 0.25245 | <i>galE</i>             |
| WP_000096869.1 | 0.90315 | 0.55292 | <i>G711_00399</i>       |
| WP_001147439.1 | 0.90376 | 0.55549 | <i>modE</i>             |
| WP_000101984.1 | 1.0234  | 0.92679 | <i>A1UI_00822</i>       |
| WP_000891692.1 | 1.6354  | 0.09764 | <i>modC</i>             |
| WP_001300666.1 | 0.94489 | 0.66001 | <i>A1UI_00825</i>       |
| WP_000815435.1 | 1.10403 | 0.42169 | <i>pgl</i>              |
| WP_001091569.1 | 0.84252 | 0.21824 | <i>ECMP0215528_0877</i> |
| WP_001295303.1 | 1.77385 | 0.05317 | <i>bioA</i>             |
| WP_000951213.1 | 0.72695 | 0.1218  | <i>bioB</i>             |
| WP_000044843.1 | 1.00058 | 0.97885 | <i>bioD</i>             |

|                |         |         |                         |
|----------------|---------|---------|-------------------------|
| WP_000042533.1 | 1.05071 | 0.83855 | <i>uvrB</i>             |
| WP_001295302.1 | 1.05317 | 0.83075 | <i>ECMP0215528_0925</i> |
| WP_000084639.1 | 1.25753 | 0.20425 | <i>moaB</i>             |
| WP_000080885.1 | 1.10881 | 0.66449 | <i>moaC</i>             |
| WP_000852296.1 | 0.99276 | 0.9587  | <i>moaE</i>             |
| WP_001393495.1 | 0.94452 | 0.65808 | <i>hlyD</i>             |
| WP_001296991.1 | 1.48208 | 0.1866  | <i>cecR</i>             |
| WP_000007101.1 | 0.95515 | 0.78492 | <i>rhIE</i>             |
| WP_000386551.1 | 1.01187 | 0.97839 | <i>ECMP0215528_0948</i> |
| WP_000443530.1 | 1.13464 | 0.49541 | <i>ECMP0215528_0949</i> |
| WP_001295299.1 | 1.17578 | 0.4938  | <i>rlmF</i>             |
| WP_000569083.1 | 0.86737 | 0.30271 | <i>ECMP0215528_0957</i> |
| WP_001159065.1 | 0.92548 | 0.65015 | <i>glnP</i>             |
| WP_000843866.1 | 0.9164  | 0.68465 | <i>glnH</i>             |
| WP_000091016.1 | 0.84693 | 0.33635 | <i>DXE50_06600</i>      |
| WP_001056384.1 | 0.91727 | 0.51915 | <i>ldtB</i>             |
| WP_000961458.1 | 0.88929 | 0.5072  | <i>ECMP0215528_0968</i> |
| WP_000168797.1 | 1.15477 | 0.54368 | <i>ECMP0215528_0969</i> |
| WP_000114272.1 | 0.87368 | 0.32678 | <i>ybiV</i>             |
| WP_001336208.1 | 1.23195 | 0.48996 | <i>fsa</i>              |
| WP_000829217.1 | 1.03727 | 0.91732 | <i>moeB</i>             |
| WP_000397340.1 | 0.93717 | 0.83032 | <i>moeA</i>             |
| WP_000513781.1 | 1.02208 | 0.95734 | <i>iaaA</i>             |
| WP_001301279.1 | 1.16556 | 0.61604 | <i>gsiA</i>             |
| WP_000090140.1 | 1.17346 | 0.49913 | <i>gsiB</i>             |
| WP_000049367.1 | 0.80122 | 0.11972 | <i>rimO</i>             |
| WP_000555031.1 | 1.13945 | 0.67142 | <i>A1UI_00905</i>       |
| WP_001295292.1 | 1.03919 | 0.8576  | <i>DXE50_06705</i>      |
| WP_000450121.1 | 0.95999 | 0.80726 | <i>deoR</i>             |
| WP_000023565.1 | 1.17083 | 0.60526 | <i>ybjI</i>             |
| WP_001024876.1 | 1.04328 | 0.90171 | <i>ybjL</i>             |
| WP_001195240.1 | 1.10207 | 0.75621 | <i>EKN05_012210</i>     |
| WP_000189159.1 | 0.94833 | 0.67828 | <i>nfsA</i>             |
| WP_000203025.1 | 0.908   | 0.62508 | <i>DXE50_06785</i>      |
| WP_000126072.1 | 1.72773 | 0.06523 | <i>O3K_17075</i>        |
| WP_001295339.1 | 1.11397 | 0.72853 | <i>DXE50_06835</i>      |
| WP_000756569.1 | 1.08604 | 0.47872 | <i>ECMP0215528_1029</i> |
| WP_000027205.1 | 1.00076 | 0.99533 | <i>artP</i>             |
| WP_001270734.1 | 1.05599 | 0.78634 | <i>O3K_17020</i>        |
| WP_001160737.1 | 1.27037 | 0.31016 | <i>ybjQ</i>             |
| WP_001252135.1 | 0.94104 | 0.75007 | <i>amiD</i>             |
| WP_001338420.1 | 0.95642 | 0.80928 | <i>ECMP0215528_1034</i> |
| WP_000566376.1 | 0.91958 | 0.53048 | <i>ltaE</i>             |
| WP_000491142.1 | 0.80194 | 0.28019 | <i>ECMP0215528_1040</i> |
| WP_000599802.1 | 0.68714 | 0.06947 | <i>KXD89_14410</i>      |
| WP_000746442.1 | 0.74895 | 0.09585 | <i>macA</i>             |
| WP_000410785.1 | 1.10462 | 0.59719 | <i>cspD</i>             |
| WP_000520781.1 | 0.82263 | 0.33773 | <i>clpS</i>             |

|                |         |         |                  |
|----------------|---------|---------|------------------|
| WP_000934041.1 | 1.3153  | 0.06923 | <i>clpA</i>      |
| WP_001040187.1 | 0.89706 | 0.55604 | <i>infA</i>      |
| WP_001202177.1 | 1.06197 | 0.80312 | <i>cydC</i>      |
| WP_001043598.1 | 1.05219 | 0.83386 | <i>cydD</i>      |
| WP_000537418.1 | 0.96859 | 0.96335 | <i>trxB</i>      |
| WP_000228473.1 | 1.00353 | 0.80176 | GA0061070_10177  |
| WP_000076967.1 | 0.95066 | 0.76427 | <i>ftsK</i>      |
| WP_000067755.1 | 0.94732 | 0.77421 | DXE50_07020      |
| WP_000886683.1 | 0.91375 | 0.66651 | <i>serS</i>      |
| WP_000213098.1 | 1.00613 | 0.99987 | <i>dmsB</i>      |
| WP_000111043.1 | 0.88707 | 0.3812  | <i>pflA</i>      |
| WP_001292822.1 | 1.04751 | 0.61756 | A13A_00842       |
| WP_000642546.1 | 1.46191 | 0.10632 | <i>focA</i>      |
| WP_001295344.1 | 0.88681 | 0.49203 | DXE50_07080      |
| WP_000642849.1 | 1.44254 | 0.21926 | ECMP0215528_1073 |
| WP_000057138.1 | 0.93545 | 0.81808 | <i>serC</i>      |
| WP_000445231.1 | 0.94309 | 0.65049 | <i>aroA</i>      |
| WP_000125016.1 | 0.86821 | 0.30586 | <i>cmk</i>       |
| WP_000140327.1 | 0.87299 | 0.41132 | <i>rpsA</i>      |
| WP_000167336.1 | 1.33868 | 0.10374 | <i>ihfB</i>      |
| WP_000551270.1 | 1.0076  | 0.98025 | <i>msbA</i>      |
| WP_000570539.1 | 1.03624 | 0.92    | <i>lpxK</i>      |
| WP_000350058.1 | 0.82909 | 0.27869 | <i>ycaR</i>      |
| WP_000011603.1 | 1.09359 | 0.6376  | <i>kdsB</i>      |
| WP_001298300.1 | 0.89533 | 0.57853 | <i>cmoM</i>      |
| WP_001288850.1 | 0.90908 | 0.57823 | <i>mukF</i>      |
| WP_001295347.1 | 0.95492 | 0.78386 | <i>mukE</i>      |
| WP_000572698.1 | 0.97589 | 0.92874 | <i>mukB</i>      |
| WP_001109486.1 | 1.28895 | 0.15836 | A1UI_01038       |
| WP_000462687.1 | 0.94248 | 0.86824 | DXE50_07195      |
| WP_000117881.1 | 0.90393 | 0.60066 | <i>asnS</i>      |
| WP_001307697.1 | 0.90363 | 0.45446 | <i>pncB</i>      |
| WP_000193841.1 | 1.00841 | 0.78011 | A1UI_01043       |
| WP_001295352.1 | 0.8006  | 0.11817 | <i>pyrD</i>      |
| WP_000212426.1 | 1.02111 | 0.9349  | A1UI_01060       |
| WP_001086539.1 | 1.04951 | 0.81351 | <i>rlmL</i>      |
| WP_000053099.1 | 0.94479 | 0.65948 | <i>uup</i>       |
| WP_000445533.1 | 1.05773 | 0.81638 | O3K_16585        |
| WP_000759120.1 | 1.35644 | 0.19532 | <i>pqiC</i>      |
| WP_000227927.1 | 0.91701 | 0.68885 | <i>fabA</i>      |
| WP_000156518.1 | 0.97561 | 0.87955 | A1UI_01068       |
| WP_000877161.1 | 0.87743 | 0.5146  | <i>matP</i>      |
| WP_000750416.1 | 1.20989 | 0.1824  | <i>ompA</i>      |
| WP_001261235.1 | 0.83298 | 0.29073 | DXE50_07360      |
| WP_001295354.1 | 1.11555 | 0.38783 | A1UI_01075       |
| WP_000424181.1 | 0.83089 | 0.21327 | <i>mgsA</i>      |
| WP_001301418.1 | 1.16784 | 0.39724 | KXD89_13960      |
| WP_000116297.1 | 0.98925 | 0.90188 | <i>rlmI</i>      |

|                |         |         |                         |
|----------------|---------|---------|-------------------------|
| WP_000904442.1 | 0.86553 | 0.4026  | <i>tusE</i>             |
| WP_000375136.1 | 0.92143 | 0.67537 | <i>yccA</i>             |
| WP_001300464.1 | 0.82791 | 0.3533  | <i>G711_00113</i>       |
| WP_001044279.1 | 1.15063 | 0.44623 | <i>agp</i>              |
| WP_001143120.1 | 1.41568 | 0.05157 | <i>DXE50_07910</i>      |
| WP_000191701.1 | 1.13272 | 0.68622 | <i>rutR</i>             |
| WP_001326840.1 | 0.97377 | 0.93876 | <i>putA</i>             |
| WP_001018479.1 | 0.84104 | 0.21374 | <i>putP</i>             |
| WP_000154398.1 | 0.72529 | 0.06444 | <i>EKN05_011205</i>     |
| WP_000533522.1 | 1.32347 | 0.34993 | <i>phoH</i>             |
| WP_000351317.1 | 1.08398 | 0.48554 | <i>ghrA</i>             |
| WP_000283667.1 | 1.17907 | 0.36745 | <i>ycdX</i>             |
| WP_001001921.1 | 1.05295 | 0.79902 | <i>A13A_00953</i>       |
| WP_001189321.1 | 1.44676 | 0.11631 | <i>csgG</i>             |
| WP_000857405.1 | 1.26374 | 0.32094 | <i>ymdB</i>             |
| WP_001343212.1 | 0.94304 | 0.87224 | <i>mdoG</i>             |
| WP_001295445.1 | 0.93603 | 0.6975  | <i>mdoH</i>             |
| WP_000180056.1 | 1.30993 | 0.13287 | <i>ECMP0215528_1226</i> |
| WP_000183364.1 | 0.93462 | 0.69116 | <i>lpxL</i>             |
| WP_000749261.1 | 1.04732 | 0.84935 | <i>yceI</i>             |
| WP_000872833.1 | 1.03792 | 0.86313 | <i>solA</i>             |
| WP_001217754.1 | 0.97368 | 0.87584 | <i>dinI_4</i>           |
| WP_000126534.1 | 0.85564 | 0.32051 | <i>pyrC</i>             |
| WP_001295443.1 | 0.79767 | 0.19206 | <i>DXE50_08675</i>      |
| WP_000780912.1 | 1.1165  | 0.38512 | <i>O3K_15240</i>        |
| WP_000468186.1 | 1.13349 | 0.59765 | <i>rimJ</i>             |
| WP_000877107.1 | 1.16762 | 0.39784 | <i>yceH</i>             |
| WP_001050683.1 | 0.84721 | 0.41308 | <i>murJ</i>             |
| WP_000827360.1 | 0.9269  | 0.75762 | <i>rne</i>              |
| WP_000846343.1 | 1.18057 | 0.3636  | <i>rluC</i>             |
| WP_001125202.1 | 1.10862 | 0.58293 | <i>EKN05_010785</i>     |
| WP_001174481.1 | 0.92355 | 0.64154 | <i>yceD</i>             |
| WP_000197597.1 | 1.23249 | 0.48902 | <i>plsX</i>             |
| WP_000288132.1 | 1.03686 | 0.65979 | <i>fabH</i>             |
| WP_000191372.1 | 1.06602 | 0.54804 | <i>fabD</i>             |
| WP_001008535.1 | 1.05165 | 0.60155 | <i>fabG</i>             |
| WP_000103754.1 | 0.91807 | 0.69613 | <i>acpP</i>             |
| WP_000044679.1 | 0.93509 | 0.8155  | <i>fabF</i>             |
| WP_000478681.1 | 1.12964 | 0.69305 | <i>pabC</i>             |
| WP_000756827.1 | 0.91903 | 0.66631 | <i>yceG</i>             |
| WP_001257000.1 | 0.92772 | 0.66012 | <i>tmk</i>              |
| WP_001267956.1 | 1.17002 | 0.60691 | <i>holB</i>             |
| WP_000480245.1 | 1.07769 | 0.75497 | <i>ECMP0215528_1276</i> |
| WP_000475719.1 | 0.99306 | 0.84903 | <i>ptsG</i>             |
| WP_000807125.1 | 1.01056 | 0.98428 | <i>hinT</i>             |
| WP_000164439.1 | 1.08518 | 0.66943 | <i>lpoB</i>             |
| WP_000529320.1 | 0.99875 | 0.98616 | <i>nagZ</i>             |
| WP_000587933.1 | 1.23034 | 0.25239 | <i>ycfP</i>             |

|                |         |         |                         |
|----------------|---------|---------|-------------------------|
| WP_000211045.1 | 0.94078 | 0.85607 | <i>DXE50_08910</i>      |
| WP_001043459.1 | 0.8499  | 0.34653 | <i>DXE50_08915</i>      |
| WP_001336528.1 | 1.18642 | 0.57416 | <i>comR</i>             |
| WP_001115094.1 | 1.01209 | 0.76402 | <i>mfd</i>              |
| WP_000284714.1 | 1.06666 | 0.8422  | <i>lolC</i>             |
| WP_001033694.1 | 1.10629 | 0.67156 | <i>lolD</i>             |
| WP_001251348.1 | 0.96166 | 0.82949 | <i>HMPREF1620_01675</i> |
| WP_000291270.1 | 1.17005 | 0.60685 | <i>nagK</i>             |
| AIN31583.1     | 1.02465 | 0.92317 | -                       |
| WP_000759317.1 | 0.98933 | 0.90234 | <i>potD</i>             |
| WP_000580316.1 | 1.02238 | 0.93069 | <i>potC</i>             |
| AIN31588.1     | 1.00257 | 0.98638 | -                       |
| WP_000531594.1 | 1.00948 | 0.98917 | <i>potA</i>             |
| WP_000359434.1 | 1.30417 | 0.13949 | <i>pepT</i>             |
| WP_000456506.1 | 1.02436 | 0.92411 | <i>AB05_1317</i>        |
| WP_000423742.1 | 0.96317 | 0.98921 | <i>purB</i>             |
| WP_001297479.1 | 1.06422 | 0.79613 | <i>hflD</i>             |
| WP_001297484.1 | 0.93794 | 0.62356 | <i>trmU</i>             |
| WP_000476093.1 | 1.32076 | 0.35355 | <i>nudJ</i>             |
| WP_000444484.1 | 0.94233 | 0.86717 | <i>icd</i>              |
| WP_000848748.1 | 0.82654 | 0.34922 | <i>A311_03318</i>       |
| WP_000888772.1 | 0.67962 | 0.0618  | <i>ariR</i>             |
| WP_001185665.1 | 0.91918 | 0.52851 | <i>minE</i>             |
| WP_000101055.1 | 1.10434 | 0.42077 | <i>minD</i>             |
| WP_001301105.1 | 1.08877 | 0.72199 | <i>minC</i>             |
| WP_001056840.1 | 0.73219 | 0.07267 | <i>HMPREF1602_05104</i> |
| WP_000695215.1 | 1.04002 | 0.87281 | <i>KXD89_12850</i>      |
| WP_001295992.1 | 0.94612 | 0.66652 | <i>ycgL</i>             |
| WP_000943459.1 | 0.96616 | 0.84684 | <i>dsbB</i>             |
| WP_000406391.1 | 0.76015 | 0.11403 | <i>nhaB</i>             |
| WP_000234823.1 | 0.8679  | 0.41144 | <i>fadR</i>             |
| WP_001266908.1 | 0.93618 | 0.82324 | <i>dadA</i>             |
| WP_000197881.1 | 1.13371 | 0.49838 | <i>dadX</i>             |
| WP_000051560.1 | 1.04819 | 0.84658 | <i>A1UI_01327</i>       |
| WP_001301104.1 | 0.85682 | 0.37084 | <i>emtA</i>             |
| WP_000841714.1 | 1.34023 | 0.10234 | <i>treA</i>             |
| WP_001301101.1 | 0.97338 | 0.81432 | <i>A1UI_01333</i>       |
| WP_000059411.1 | 0.98689 | 0.88886 | <i>EL76_2821</i>        |
| WP_000733715.1 | 1.13044 | 0.34707 | <i>A1UI_01335</i>       |
| WP_000505866.1 | 0.93565 | 0.81949 | <i>ychF</i>             |
| WP_000152933.1 | 0.87289 | 0.32372 | <i>pth</i>              |
| WP_000823885.1 | 1.11267 | 0.65374 | <i>ychH</i>             |
| WP_001033352.1 | 0.94965 | 0.75962 | <i>dauA</i>             |
| WP_001298109.1 | 0.96093 | 1       | <i>prs</i>              |
| WP_001260332.1 | 0.93604 | 0.69755 | <i>ispE</i>             |
| WP_001130692.1 | 1.06157 | 0.76327 | <i>lolB</i>             |
| WP_001299679.1 | 1.10918 | 0.73959 | <i>hemA</i>             |
| WP_000804726.1 | 1.06009 | 0.76936 | <i>prfA</i>             |



|                |         |         |                         |
|----------------|---------|---------|-------------------------|
| WP_000456467.1 | 0.95669 | 0.8103  | <i>prmC</i>             |
| WP_000811065.1 | 1.06646 | 0.54647 | <i>kdsA</i>             |
| WP_000063607.1 | 1.61491 | 0.10666 | <i>chaA</i>             |
| WP_001146444.1 | 1.06637 | 0.84293 | <i>chaB</i>             |
| WP_001169669.1 | 0.99515 | 0.93443 | <i>ychN</i>             |
| WP_000070491.1 | 0.98183 | 0.86089 | <i>narL</i>             |
| WP_000918073.1 | 1.20054 | 0.43932 | <i>narX</i>             |
| WP_000019827.1 | 1.30333 | 0.26087 | <i>narK</i>             |
| WP_000032939.1 | 1.21689 | 0.17169 | <i>KXD89_12605</i>      |
| WP_000571681.1 | 1.33354 | 0.22161 | <i>narJ</i>             |
| WP_001160108.1 | 1.41301 | 0.14168 | <i>narI</i>             |
| WP_000555857.1 | 0.92352 | 0.54998 | <i>purU</i>             |
| WP_001307143.1 | 0.97483 | 0.8803  | <i>ychJ</i>             |
| WP_000193447.1 | 1.126   | 0.7012  | <i>rssB</i>             |
| WP_001287378.1 | 1.08268 | 0.4899  | <i>DXE50_00785</i>      |
| WP_000068077.1 | 0.97464 | 0.87507 | <i>tdk</i>              |
| WP_000301651.1 | 1.0954  | 0.44841 | <i>adhE</i>             |
| WP_001393463.1 | 1.08807 | 0.47202 | <i>oppA</i>             |
| WP_000911112.1 | 1.03634 | 0.86997 | <i>oppB</i>             |
| WP_000979661.1 | 1.12952 | 0.60809 | <i>O3K_14420</i>        |
| WP_000110948.1 | 1.16084 | 0.41669 | <i>oppD</i>             |
| WP_000994906.1 | 1.08554 | 0.48035 | <i>oppF</i>             |
| WP_000214516.1 | 1.16786 | 0.61132 | <i>cls</i>              |
| WP_001309467.1 | 0.8516  | 0.42725 | <i>DXE50_00840</i>      |
| WP_001295624.1 | 1.31132 | 0.36638 | <i>A1UI_01400</i>       |
| WP_000967595.1 | 0.8329  | 0.29051 | <i>DXE50_00850</i>      |
| WP_000108160.1 | 0.88021 | 0.45887 | <i>yciA</i>             |
| WP_000028545.1 | 0.78077 | 0.22732 | <i>yciC</i>             |
| WP_000737226.1 | 1.09286 | 0.45651 | <i>ompW</i>             |
| WP_001079505.1 | 1.48223 | 0.09415 | <i>A1UI_01407</i>       |
| WP_000443067.1 | 1.15984 | 0.4195  | <i>trpA</i>             |
| WP_000209520.1 | 1.12136 | 0.53893 | <i>trpB</i>             |
| WP_000763511.1 | 0.91213 | 0.64046 | <i>trpD</i>             |
| WP_001194582.1 | 1.49261 | 0.08843 | <i>A1UI_01414</i>       |
| WP_001295575.1 | 1.37205 | 0.07711 | <i>DXE50_17760</i>      |
| WP_001291217.1 | 0.99475 | 0.93222 | <i>WG3_01862</i>        |
| WP_001278906.1 | 0.84014 | 0.31371 | <i>HMPREF1591_00308</i> |
| WP_000559286.1 | 0.96076 | 0.74524 | <i>KXD89_12335</i>      |
| WP_000422045.1 | 0.99473 | 0.96776 | <i>sohB</i>             |
| WP_001031530.1 | 1.02748 | 0.90874 | <i>DXE50_17730</i>      |
| WP_001297122.1 | 1.04479 | 0.6282  | <i>topA</i>             |
| WP_000776253.1 | 0.92983 | 0.66959 | <i>cysB</i>             |
| WP_000099534.1 | 1.33864 | 0.05503 | <i>acnA</i>             |
| WP_001176295.1 | 0.87123 | 0.31731 | <i>ribA</i>             |
| WP_000876286.1 | 0.76527 | 0.19267 | <i>lapA</i>             |
| WP_000891353.1 | 0.93791 | 0.73809 | <i>lapB</i>             |
| WP_000176270.1 | 0.87706 | 0.43438 | <i>pyrF</i>             |
| WP_001295580.1 | 0.96668 | 0.8382  | <i>ECMP0215528_1563</i> |

|                |         |         |                  |
|----------------|---------|---------|------------------|
| WP_001088620.1 | 0.99243 | 0.95719 | KXD89_12255      |
| WP_000484984.1 | 0.94914 | 0.91586 | <i>rnb</i>       |
| WP_000506490.1 | 0.92278 | 0.72876 | <i>fabI</i>      |
| WP_001146163.1 | 0.97332 | 0.87445 | <i>sapC</i>      |
| WP_001250216.1 | 0.9719  | 0.86901 | O3K_13860        |
| WP_001296746.1 | 0.86463 | 0.47053 | <i>puuA</i>      |
| WP_001300506.1 | 1.30699 | 0.25583 | A1UI_01451       |
| WP_001009090.1 | 0.87511 | 0.50652 | A1UI_01453       |
| WP_000069229.1 | 0.92368 | 0.6839  | EL76_2650        |
| WP_001301108.1 | 0.94807 | 0.77708 | <i>pspF</i>      |
| WP_000511025.1 | 1.173   | 0.24843 | <i>pspA</i>      |
| WP_000907387.1 | 0.96914 | 0.85833 | <i>pspC</i>      |
| WP_000473109.1 | 0.93582 | 0.61253 | <i>pspE</i>      |
| WP_000075375.1 | 0.91183 | 0.63934 | A1UI_01474       |
| WP_000825775.1 | 0.89645 | 0.58261 | A1UI_01475       |
| WP_000138728.1 | 1.46718 | 0.19836 | <i>ycjF</i>      |
| WP_001300658.1 | 1.14548 | 0.4617  | <i>tyrR</i>      |
| WP_000084387.1 | 0.91692 | 0.68823 | <i>tpx</i>       |
| WP_001261211.1 | 1.10333 | 0.60182 | A1UI_01479       |
| WP_000219122.1 | 0.95439 | 0.80142 | <i>mpaA</i>      |
| WP_001300523.1 | 0.98617 | 0.92387 | A1UI_01482       |
| WP_000683020.1 | 1.01819 | 0.95002 | <i>mppA</i>      |
| WP_000559900.1 | 1.3276  | 0.34448 | <i>ynal</i>      |
| WP_001262123.1 | 1.27742 | 0.09941 | <i>uspE</i>      |
| WP_000611911.1 | 0.77993 | 0.07775 | <i>fnr</i>       |
| WP_000945011.1 | 0.8847  | 0.54027 | DXE50_17365      |
| WP_000444929.1 | 0.71002 | 0.09704 | <i>abgA</i>      |
| WP_001046829.1 | 1.2152  | 0.51978 | <i>smrA</i>      |
| WP_000387388.1 | 1.07318 | 0.82597 | <i>zntB</i>      |
| WP_000123737.1 | 0.98579 | 0.92241 | <i>dbpA</i>      |
| WP_001157406.1 | 0.8635  | 0.28847 | <i>ttcA</i>      |
| WP_000948459.1 | 0.95835 | 0.81673 | C4A13_02150      |
| WP_001300461.1 | 1.20878 | 0.2967  | A1UI_01500       |
| WP_000628244.1 | 0.93072 | 0.58634 | <i>nifJ</i>      |
| WP_000762236.1 | 1.12099 | 0.37256 | HMPREF1591_00398 |
| WP_000698145.1 | 0.9474  | 0.77451 | EKN05_007005     |
| WP_000039887.1 | 1.07984 | 0.80959 | A1UI_01524       |
| WP_001123464.1 | 1.38635 | 0.27439 | EL76_2579        |
| WP_000097801.1 | 1.24619 | 0.35093 | O3K_13465        |
| WP_000048950.1 | 0.77532 | 0.14232 | <i>azoR</i>      |
| WP_000139543.1 | 1.02189 | 0.93352 | <i>hrpA</i>      |
| WP_001027942.1 | 1.0885  | 0.65673 | HGD79_04235      |
| WP_000115943.1 | 1.11616 | 0.38609 | <i>aldA</i>      |
| WP_000428998.1 | 1.27057 | 0.42625 | <i>cybB</i>      |
| WP_000414567.1 | 0.76413 | 0.19026 | KXD89_11535      |
| WP_000013789.1 | 1.29571 | 0.27164 | KXD89_11530      |
| WP_000375961.1 | 1.02853 | 0.91035 | <i>opgD</i>      |
| WP_001296778.1 | 1.04301 | 0.84119 | DXE50_16735      |

|                |         |         |                     |
|----------------|---------|---------|---------------------|
| WP_000140873.1 | 1.10872 | 0.74066 | <i>rimL</i>         |
| WP_000586732.1 | 1.12798 | 0.61217 | <i>O3K_13350</i>    |
| WP_001261013.1 | 1.19961 | 0.31731 | <i>DXE50_16710</i>  |
| WP_001303492.1 | 0.91172 | 0.58967 | <i>CSW52_29105</i>  |
| WP_000047424.1 | 1.29599 | 0.14938 | <i>A1UI_01562</i>   |
| WP_000531462.1 | 1.35975 | 0.08611 | <i>CSW52_29020</i>  |
| WP_000689363.1 | 0.7665  | 0.12535 | <i>KXD89_11385</i>  |
| WP_000550695.1 | 0.79397 | 0.10084 | <i>KXD89_11380</i>  |
| WP_001120143.1 | 0.801   | 0.27769 | <i>pptA</i>         |
| WP_010723100.1 | 1.23982 | 0.23466 | <i>fdnG</i>         |
| WP_001240582.1 | 1.42264 | 0.23755 | <i>fdxH</i>         |
| WP_000045648.1 | 1.55727 | 0.05944 | <i>fdnI</i>         |
| WP_000152305.1 | 1.34045 | 0.10214 | <i>osmC</i>         |
| WP_000830550.1 | 0.84815 | 0.34052 | <i>EL76_2497</i>    |
| WP_000350395.1 | 0.87273 | 0.49825 | <i>EKN05_007410</i> |
| WP_001244968.1 | 0.99212 | 0.95575 | <i>KXD89_11170</i>  |
| WP_000832437.1 | 1.07902 | 0.81158 | <i>KXD89_11165</i>  |
| WP_001125439.1 | 0.92103 | 0.67387 | <i>A1UI_01641</i>   |
| WP_000154342.1 | 1.58929 | 0.11903 | <i>lsrR</i>         |
| WP_000172465.1 | 1.3343  | 0.2207  | <i>lsrB</i>         |
| WP_000774165.1 | 1.21046 | 0.29304 | <i>lsrF</i>         |
| WP_000558527.1 | 1.34641 | 0.32055 | <i>lsrG</i>         |
| WP_001286597.1 | 1.41424 | 0.14068 | <i>tam</i>          |
| WP_000156615.1 | 1.0954  | 0.772   | <i>sad</i>          |
| WP_000210799.1 | 0.84195 | 0.39635 | <i>ydeA</i>         |
| WP_000671737.1 | 1.29327 | 0.27517 | <i>A311_02188</i>   |
| WP_000210373.1 | 1.0102  | 0.77227 | <i>dcp</i>          |
| WP_000636571.1 | 0.97181 | 0.94803 | <i>ydfG</i>         |
| WP_000215549.1 | 1.11046 | 0.73662 | <i>DXE50_16075</i>  |
| WP_001019606.1 | 0.85056 | 0.24374 | <i>WG3_02248</i>    |
| WP_000534858.1 | 0.81405 | 0.31317 | <i>relB</i>         |
| WP_000448564.1 | 1.28009 | 0.41159 | <i>WG3_02272</i>    |
| WP_001295394.1 | 1.49196 | 0.17915 | <i>rspA</i>         |
| WP_001340362.1 | 1.0814  | 0.80576 | <i>KXD89_10665</i>  |
| WP_000148710.1 | 1.0834  | 0.73789 | <i>dmsD</i>         |
| WP_000919231.1 | 1.45354 | 0.20969 | <i>bioD</i>         |
| WP_000225262.1 | 0.99102 | 0.94244 | <i>mlc</i>          |
| WP_000014036.1 | 1.0156  | 0.96158 | <i>pntB</i>         |
| WP_001300486.1 | 1.02805 | 0.90621 | <i>A1UI_01794</i>   |
| WP_000769303.1 | 1.04693 | 0.6198  | <i>KXD89_10570</i>  |
| WP_000520804.1 | 1.05582 | 0.86954 | <i>foIM</i>         |
| WP_000135181.1 | 1.34011 | 0.32841 | <i>tus</i>          |
| WP_001099085.1 | 1.04277 | 0.63616 | <i>fumC</i>         |
| WP_000066639.1 | 0.93972 | 0.84848 | <i>DXE50_15495</i>  |
| WP_001170664.1 | 0.87534 | 0.42458 | <i>A1UI_01804</i>   |
| WP_000945878.1 | 1.01378 | 0.95941 |                     |
| WP_000969092.1 | 1.67658 | 0.08165 | <i>DXE50_15465</i>  |
| WP_000125583.1 | 0.83075 | 0.3618  | <i>malX</i>         |

|                |         |         |                     |
|----------------|---------|---------|---------------------|
| WP_000567490.1 | 0.85329 | 0.30918 | <i>add</i>          |
| WP_001282550.1 | 0.94237 | 0.72632 | <i>KXD89_10470</i>  |
| WP_000217950.1 | 0.83541 | 0.29843 | <i>ydgT</i>         |
| WP_000991805.1 | 0.82192 | 0.33565 | <i>rsxB</i>         |
| WP_000915778.1 | 1.09829 | 0.76515 | <i>rsxC</i>         |
| WP_000920784.1 | 1.18974 | 0.56768 | <i>rsxG</i>         |
| WP_000100932.1 | 0.78608 | 0.16504 | <i>dtpA</i>         |
| WP_000765749.1 | 1.21877 | 0.1689  | <i>gstA</i>         |
| WP_001307229.1 | 1.02102 | 0.93735 | <i>pdxY</i>         |
| WP_001295400.1 | 1.07831 | 0.50475 | <i>tyrS</i>         |
| WP_001282319.1 | 1.13502 | 0.49421 | <i>pdxH</i>         |
| WP_000835039.1 | 1.27406 | 0.30428 | <i>anmK</i>         |
| WP_001296937.1 | 1.25513 | 0.33538 | <i>sodC</i>         |
| WP_000250656.1 | 1.07163 | 0.72251 | <i>DXE50_15315</i>  |
| WP_000093589.1 | 0.94541 | 0.66275 | <i>nemA</i>         |
| WP_001237796.1 | 0.90862 | 0.47768 | <i>gloA</i>         |
| WP_001282283.1 | 0.98859 | 0.93953 | <i>rnt</i>          |
| WP_000108172.1 | 0.77429 | 0.06452 | <i>DXE50_15280</i>  |
| WP_000007283.1 | 1.05264 | 0.59779 | <i>sodB</i>         |
| WP_000190982.1 | 1.06712 | 0.74062 | <i>purR</i>         |
| WP_000098896.1 | 1.27481 | 0.17781 | <i>DXE50_15240</i>  |
| WP_000493947.1 | 1.05324 | 0.79781 | <i>ribE</i>         |
| WP_001174940.1 | 1.27293 | 0.42258 | <i>mdtK</i>         |
| WP_000534271.1 | 0.98002 | 0.85091 | <i>KXD89_10260</i>  |
| WP_000212657.1 | 1.13182 | 0.60202 | <i>EKN05_007655</i> |
| WP_000716950.1 | 1.35804 | 0.30647 | <i>KXD89_10240</i>  |
| WP_000528342.1 | 1.15237 | 0.64361 | <i>fumD</i>         |
| WP_001295403.1 | 0.99749 | 0.82888 | <i>DXE50_15165</i>  |
| WP_000648420.1 | 0.83847 | 0.24326 | <i>lpp</i>          |
| WP_000817105.1 | 1.55418 | 0.06059 | <i>ldtE</i>         |
| WP_001196530.1 | 1.04496 | 0.89736 | <i>sufE</i>         |
| WP_000907979.1 | 1.35152 | 0.3143  | <i>sufD</i>         |
| WP_000948863.1 | 1.51312 | 0.16411 | <i>sufC</i>         |
| WP_000089364.1 | 1.01095 | 0.98711 | <i>sufB</i>         |
| WP_000367160.1 | 1.41625 | 0.13904 | <i>sufA</i>         |
| WP_001296104.1 | 1.13743 | 0.67583 | <i>DXE50_15120</i>  |
| WP_000637982.1 | 0.90944 | 0.63043 | <i>ydil</i>         |
| WP_000613008.1 | 1.0556  | 0.82305 | <i>KXD89_10145</i>  |
| WP_000248636.1 | 0.97269 | 0.87203 | <i>ydiK</i>         |
| WP_000860201.1 | 0.98371 | 0.91698 | <i>aroD</i>         |
| WP_000368046.1 | 0.90964 | 0.4825  | <i>ppsR</i>         |
| WP_001082229.1 | 1.02791 | 0.90684 | <i>aroH</i>         |
| WP_001229265.1 | 1.01487 | 0.75194 | <i>ihfA</i>         |
| WP_000672380.1 | 0.99358 | 0.84666 | <i>pheT</i>         |
| WP_000018596.1 | 0.96551 | 0.97804 | <i>pheS</i>         |
| pdb 6H58 QQ    | 0.86159 | 0.35025 | -                   |
| pdb 6H58 33    | 1.31814 | 0.06735 | -                   |
| WP_001700733.1 | 1.12747 | 0.35494 | <i>infC</i>         |

|                |         |         |                         |
|----------------|---------|---------|-------------------------|
| WP_001144202.1 | 0.94079 | 0.85613 | <i>thrS</i>             |
| WP_000251727.1 | 1.35172 | 0.09249 | <i>EL76_2143</i>        |
| WP_000146159.1 | 1.54989 | 0.06223 | <i>ghoS</i>             |
| WP_000106833.1 | 0.8861  | 0.37712 | <i>A1UI_01927</i>       |
| WP_001010696.1 | 1.02013 | 0.93817 | <i>A1UI_01929</i>       |
| WP_000412169.1 | 1.11454 | 0.72723 | <i>chbB</i>             |
| WP_001039044.1 | 1.15999 | 0.27588 | <i>osmE</i>             |
| WP_000175026.1 | 1.04662 | 0.62104 | <i>nadE</i>             |
| WP_001228984.1 | 0.89819 | 0.42969 | <i>A1UI_01943</i>       |
| WP_000368506.1 | 0.96843 | 0.85562 | <i>astE</i>             |
| WP_000177206.1 | 1.38023 | 0.17091 | <i>astD</i>             |
| WP_000673918.1 | 0.91575 | 0.51177 | <i>xth</i>              |
| WP_000939212.1 | 1.41773 | 0.13786 | <i>A1UI_01951</i>       |
| WP_001215339.1 | 1.44566 | 0.21651 | <i>A1UI_01954</i>       |
| WP_001350515.1 | 1.24275 | 0.35707 | <i>ynjE</i>             |
| WP_000373021.1 | 1.00708 | 1       | <i>gdhA</i>             |
| WP_001235800.1 | 1.05452 | 0.87283 | <i>topB</i>             |
| WP_001295485.1 | 1.02626 | 0.91412 | <i>selD</i>             |
| WP_000339283.1 | 1.11925 | 0.54607 | <i>O3K_11135</i>        |
| WP_001259810.1 | 1.05252 | 0.80085 | <i>sppA</i>             |
| WP_001170162.1 | 0.97494 | 0.87642 | <i>DXE50_14700</i>      |
| WP_001135066.1 | 1.07654 | 0.81768 | <i>KXD89_09735</i>      |
| WP_000719096.1 | 0.8888  | 0.49328 | <i>HMPREF1591_01708</i> |
| WP_000645221.1 | 0.78431 | 0.23574 | <i>KXD89_09695</i>      |
| WP_001300415.1 | 1.03745 | 0.88117 | <i>KXD89_09690</i>      |
| WP_001284618.1 | 1.11407 | 0.56386 | <i>msrB</i>             |
| WP_000153502.1 | 0.87617 | 0.42929 | <i>gapA</i>             |
| WP_001335909.1 | 0.83791 | 0.20439 | <i>A1UI_01981</i>       |
| WP_000163771.1 | 0.97313 | 0.94177 | <i>DXE50_14620</i>      |
| WP_000219687.1 | 1.4224  | 0.23778 | <i>yeaH</i>             |
| WP_000766132.1 | 0.96344 | 0.83635 | <i>O3K_11030</i>        |
| WP_000138043.1 | 1.02932 | 0.90776 | <i>A311_02408</i>       |
| WP_001326526.1 | 1.49173 | 0.0889  | <i>KXD89_09615</i>      |
| WP_000691930.1 | 0.86522 | 0.4725  | <i>ECMP0215528_2082</i> |
| WP_000939317.1 | 0.96462 | 0.8409  | <i>yeaR</i>             |
| WP_000758422.1 | 1.11204 | 0.5709  | <i>fadD</i>             |
| WP_000290576.1 | 1.13824 | 0.58532 | <i>yeaY</i>             |
| WP_001220966.1 | 0.79285 | 0.18051 | <i>A1UI_02007</i>       |
| WP_001295493.1 | 1.03046 | 0.89562 | <i>DXE50_14475</i>      |
| WP_001111995.1 | 1.22272 | 0.50624 | <i>AC28_1962</i>        |
| WP_000457334.1 | 1.34905 | 0.31731 | <i>yoaH</i>             |
| WP_000854958.1 | 0.9631  | 0.75795 | <i>pabB</i>             |
| WP_000456715.1 | 1.23719 | 0.48091 | <i>nudL</i>             |
| WP_000624298.1 | 1.13593 | 0.33287 | <i>DXE50_14450</i>      |
| WP_000150543.1 | 0.82754 | 0.2008  | <i>manX</i>             |
| WP_000406926.1 | 0.94042 | 0.71742 | <i>DXE50_14430</i>      |
| WP_000228655.1 | 0.76618 | 0.0592  | <i>DXE50_14425</i>      |
| WP_000156255.1 | 0.92785 | 0.69971 | <i>yobD</i>             |

|                |         |         |                  |
|----------------|---------|---------|------------------|
| WP_001062678.1 | 1.0652  | 0.55102 | HMPREF0880_03203 |
| WP_001006866.1 | 0.98197 | 0.90776 | ECMP0215528_2119 |
| WP_001211011.1 | 1.18649 | 0.57402 | DXE50_14385      |
| WP_001262203.1 | 0.92063 | 0.53568 | kdgR             |
| WP_000984520.1 | 0.8267  | 0.17318 | htpX             |
| WP_001055791.1 | 1.06503 | 0.55165 | DXE50_14365      |
| WP_000431381.1 | 0.86862 | 0.3873  | proQ             |
| WP_001043877.1 | 0.92829 | 0.7674  | msrC             |
| WP_001326728.1 | 1.16706 | 0.51409 | yebT             |
| WP_001352260.1 | 1.14973 | 0.55614 | rsmF             |
| WP_001295499.1 | 1.60824 | 0.10976 | DXE50_14335      |
| WP_000976476.1 | 0.89048 | 0.50013 | EKN05_006800     |
| WP_000168747.1 | 1.04002 | 0.87281 | yobA             |
| WP_000944256.1 | 0.75501 | 0.17164 | exoX             |
| WP_000024757.1 | 1.49599 | 0.08664 | KXD89_09330      |
| WP_000257738.1 | 0.72033 | 0.11166 | yebG             |
| WP_000173484.1 | 1.06473 | 0.79457 | purT             |
| WP_000800512.1 | 0.90473 | 0.60594 | DXE50_14265      |
| WP_001069467.1 | 0.87316 | 0.32476 | edd              |
| WP_000301727.1 | 0.91147 | 0.65106 | zwf              |
| WP_001056706.1 | 0.93949 | 0.7132  | O3K_10665        |
| WP_000091148.1 | 1.14216 | 0.31731 | DXE50_14245      |
| WP_000448381.1 | 0.95637 | 0.79053 | msbB             |
| WP_001300644.1 | 0.7926  | 0.09839 | znuA             |
| WP_000202996.1 | 1.02201 | 0.95752 | znuC             |
| WP_000568519.1 | 1.19071 | 0.46038 | ruvB             |
| WP_000580323.1 | 1.01784 | 0.96863 | ruvA             |
| WP_000907248.1 | 1.02207 | 0.93269 | yebC             |
| WP_001258678.1 | 1.03993 | 0.64748 | aspS             |
| WP_000639274.1 | 1.40903 | 0.25083 | yecE             |
| WP_000019590.1 | 0.88012 | 0.35241 | cmoA             |
| WP_000564725.1 | 0.81439 | 0.14276 | cmoB             |
| WP_001185741.1 | 1.00617 | 1       | cutC             |
| WP_001326725.1 | 1.57063 | 0.12887 | GKR75_01495      |
| WP_001025322.1 | 0.91809 | 0.69628 | argS             |
| WP_000066951.1 | 0.78534 | 0.08612 | flhA             |
| WP_001295647.1 | 0.70971 | 0.09661 | flhD             |
| WP_000122416.1 | 0.8652  | 0.47245 | uspC             |
| WP_001295646.1 | 1.44509 | 0.11747 | otsA             |
| WP_001295645.1 | 1.05484 | 0.82547 | A1UI_02107       |
| WP_000100205.1 | 1.00875 | 0.99247 | EKN05_006250     |
| WP_001187819.1 | 0.97484 | 0.93371 | DXE50_13950      |
| WP_000548675.1 | 0.86835 | 0.38582 | DXE50_13945      |
| WP_000082127.1 | 0.91158 | 0.58906 | DXE50_13935      |
| WP_000917208.1 | 1.33276 | 0.05833 | ftnA             |
| WP_000797560.1 | 0.80035 | 0.276   | tyrP             |
| WP_000847902.1 | 1.09312 | 0.70928 | yecA             |
| WP_001160187.1 | 1.1594  | 0.62881 | pgsA             |

|                |         |         |                         |
|----------------|---------|---------|-------------------------|
| WP_001283421.1 | 1.04552 | 0.85511 | <i>uvrC</i>             |
| WP_000611335.1 | 0.89422 | 0.51549 | <i>uvrY</i>             |
| WP_000106474.1 | 1.1275  | 0.61345 | <i>EKN05_006160</i>     |
| WP_001272991.1 | 1.06012 | 0.85863 | <i>yecC</i>             |
| WP_001158220.1 | 1.21293 | 0.52392 | <i>tcyL</i>             |
| WP_001128215.1 | 1.06113 | 0.76508 | <i>dcyD</i>             |
| WP_001296168.1 | 1.12844 | 0.35235 | <i>HMPREF1604_01381</i> |
| WP_000079739.1 | 0.92585 | 0.6921  | <i>fliC</i>             |
| WP_001350519.1 | 0.98874 | 0.89906 | <i>KXD89_08915</i>      |
| WP_000118897.1 | 0.96698 | 0.83961 | <i>HMPREF1595_04608</i> |
| WP_000790504.1 | 0.7604  | 0.11446 | <i>yedF</i>             |
| WP_000922686.1 | 1.34887 | 0.31753 | <i>KXD89_08780</i>      |
| WP_001157239.1 | 0.83217 | 0.2882  | <i>G711_02468</i>       |
| WP_000218212.1 | 1.19218 | 0.21201 | <i>hchA</i>             |
| WP_000920120.1 | 1.01511 | 0.97592 | <i>HMPREF1611_00004</i> |
| WP_001007805.1 | 0.69713 | 0.0807  | <i>HMPREF1589_00386</i> |
| WP_001302302.1 | 0.90087 | 0.54327 | <i>mtfA</i>             |
| WP_001060244.1 | 1.05235 | 0.80156 | <i>amn</i>              |
| WP_000532923.1 | 0.81574 | 0.14591 | <i>yeeN</i>             |
| WP_001011008.1 | 0.83732 | 0.38191 | <i>HMPREF1602_03546</i> |
| AIN32411.1     | 1.55139 | 0.13979 | -                       |
| WP_001166160.1 | 1.14662 | 0.65589 | <i>cobT</i>             |
| WP_001326708.1 | 0.92177 | 0.67667 | <i>cobS</i>             |
| WP_000450409.1 | 0.99509 | 0.83975 | <i>yeeX</i>             |
| WP_001105415.1 | 1.26595 | 0.31731 | <i>sbmC</i>             |
| WP_000980589.1 | 0.87081 | 0.42242 | <i>sbcB</i>             |
| WP_000234896.1 | 0.87337 | 0.43224 | <i>FSF13_012590</i>     |
| WP_000019197.1 | 0.83458 | 0.37345 | <i>plaP</i>             |
| WP_000754737.1 | 1.07517 | 0.70841 | <i>yeeZ</i>             |
| WP_000131782.1 | 0.91784 | 0.52196 | <i>hisG</i>             |
| WP_000009594.1 | 0.90289 | 0.45104 | <i>hisD</i>             |
| WP_000108941.1 | 0.94242 | 0.64697 | <i>hisC</i>             |
| WP_000080105.1 | 0.93205 | 0.59312 | <i>hisB</i>             |
| WP_001103560.1 | 1.01621 | 0.95128 | <i>hisH</i>             |
| WP_000586462.1 | 0.89689 | 0.5266  | <i>hisA</i>             |
| WP_000880182.1 | 1.07384 | 0.71371 | <i>hisF</i>             |
| WP_000954911.1 | 0.92288 | 0.6386  | <i>hisI</i>             |
| WP_001393575.1 | 0.87121 | 0.40144 | <i>G736_02383</i>       |
| WP_000043484.1 | 0.89891 | 0.56794 | <i>G736_02385</i>       |
| WP_000520320.1 | 0.99207 | 0.91746 | <i>KXD89_08400</i>      |
| WP_000601187.1 | 0.96935 | 0.85054 | <i>G736_02388</i>       |
| WP_001407542.1 | 0.90456 | 0.45873 | <i>G736_02389</i>       |
| WP_000272486.1 | 0.80093 | 0.11397 | <i>G736_02391</i>       |
| WP_001100981.1 | 0.79734 | 0.19127 | <i>G736_02393</i>       |
| WP_000783975.1 | 0.99324 | 0.9239  | <i>G736_02394</i>       |
| WP_001023610.1 | 0.90633 | 0.56643 | <i>G736_02395</i>       |
| WP_000699460.1 | 0.85513 | 0.31803 | <i>rfbB</i>             |
| WP_000183060.1 | 0.85945 | 0.33937 | <i>galF</i>             |

|                |         |         |                         |
|----------------|---------|---------|-------------------------|
| WP_000454701.1 | 0.97529 | 0.88206 | <i>EKN05_005265</i>     |
| WP_001252331.1 | 1.09019 | 0.71784 | <i>ECMP0215528_2416</i> |
| WP_001234768.1 | 1.14193 | 0.47256 | <i>dcd</i>              |
| WP_001295424.1 | 0.96962 | 0.79361 | <i>udk</i>              |
| WP_000288420.1 | 1.20201 | 0.43624 | <i>alkA</i>             |
| WP_000469708.1 | 0.92492 | 0.55701 | <i>yegD</i>             |
| WP_000678989.1 | 0.99669 | 0.96408 | <i>mdtA</i>             |
| WP_000137877.1 | 1.1626  | 0.52469 | <i>baeR</i>             |
| WP_000476011.1 | 0.94256 | 0.6477  | <i>ECMP0215528_2437</i> |
| WP_000844219.1 | 0.76809 | 0.06154 | <i>A1UI_02300</i>       |
| WP_000823270.1 | 1.09506 | 0.44951 | <i>A1UI_02302</i>       |
| WP_000853883.1 | 0.86227 | 0.35376 | <i>gatZ</i>             |
| WP_001307281.1 | 0.98345 | 0.89334 | <i>gatY</i>             |
| WP_000129551.1 | 1.1765  | 0.24143 | <i>fbaB</i>             |
| WP_000846217.1 | 1.40244 | 0.15058 | <i>ECMP0215528_2449</i> |
| WP_000434038.1 | 0.99119 | 0.94309 | <i>DXE50_12360</i>      |
| WP_001005448.1 | 0.93436 | 0.81031 | <i>apbC</i>             |
| WP_001350533.1 | 0.89745 | 0.55854 | <i>metG</i>             |
| WP_000950409.1 | 1.01306 | 0.96185 | <i>DXE50_12250</i>      |
| WP_000598641.1 | 1.11994 | 0.6338  | <i>yehT</i>             |
| WP_001295431.1 | 1.36197 | 0.30183 | <i>btsS</i>             |
| WP_000569315.1 | 1.05652 | 0.86775 | <i>yehX</i>             |
| WP_001130308.1 | 1.13327 | 0.49981 | <i>osmF</i>             |
| WP_000871504.1 | 1.03223 | 0.88789 | <i>bglX</i>             |
| WP_000097403.1 | 0.98824 | 0.87114 | <i>dld</i>              |
| WP_000079538.1 | 1.66843 | 0.0846  | <i>DXE50_11940</i>      |
| WP_001264861.1 | 1.22307 | 0.5056  | <i>dusC</i>             |
| WP_000553555.1 | 0.8985  | 0.59008 | <i>cdd</i>              |
| WP_001136389.1 | 1.22945 | 0.49433 | <i>A1UI_02361</i>       |
| WP_001275118.1 | 0.72315 | 0.06204 | <i>mgIC</i>             |
| WP_000255039.1 | 0.93751 | 0.83277 | <i>A1UI_02364</i>       |
| WP_001036964.1 | 0.9365  | 0.82552 | <i>mgIB</i>             |
| WP_000628648.1 | 0.89936 | 0.59322 | <i>galS</i>             |
| WP_001139613.1 | 0.96036 | 0.99599 | <i>folE</i>             |
| WP_000425438.1 | 1.14694 | 0.56315 | <i>O3K_08675</i>        |
| WP_000489247.1 | 0.76181 | 0.05408 | <i>O3K_08670</i>        |
| WP_000253273.1 | 1.14713 | 0.6548  | <i>lysP</i>             |
| WP_000548294.1 | 0.80366 | 0.20707 | <i>DXE50_11840</i>      |
| WP_000182053.1 | 1.00928 | 0.99159 | <i>DXE50_11835</i>      |
| WP_000873894.1 | 1.05498 | 0.79053 | <i>nfo</i>              |
| WP_001292460.1 | 1.21944 | 0.5121  | <i>psuG</i>             |
| WP_000854447.1 | 1.12092 | 0.54042 | <i>fruA</i>             |
| WP_000091263.1 | 0.9087  | 0.47807 | <i>fruK</i>             |
| WP_000487246.1 | 0.87733 | 0.34117 | <i>HMPREF1589_01474</i> |
| WP_001136827.1 | 0.81447 | 0.15691 | <i>yeiP</i>             |
| WP_001091940.1 | 0.87168 | 0.49462 | <i>KXD89_07695</i>      |
| WP_000198828.1 | 1.06674 | 0.78835 | <i>yeiR</i>             |
| WP_000470560.1 | 1.10437 | 0.75081 | <i>A1UI_02392</i>       |



|                |         |         |                  |
|----------------|---------|---------|------------------|
| WP_000637046.1 | 0.99503 | 0.95775 | KXD89_07670      |
| WP_000194927.1 | 1.14992 | 0.64883 | A1UI_02396       |
| WP_001234850.1 | 1.08174 | 0.6827  | rsuA             |
| WP_000494183.1 | 0.9618  | 0.99581 | rplY             |
| WP_000050793.1 | 0.96183 | 0.99564 | yejK             |
| WP_001135667.1 | 1.16975 | 0.25507 | yejL             |
| WP_000256203.1 | 1.6667  | 0.67526 | yejM             |
| WP_001113639.1 | 0.9767  | 0.88458 | narP             |
| WP_001026418.1 | 0.983   | 0.91169 | ccmE             |
| WP_000778061.1 | 1.33821 | 0.21601 | napA             |
| WP_000849209.1 | 0.87495 | 0.33174 | eco              |
| WP_000758077.1 | 0.75345 | 0.16857 | mgo              |
| WP_000865568.1 | 0.9691  | 0.96088 | ompC             |
| WP_001249081.1 | 1.02776 | 0.90751 | rcsD             |
| WP_001061917.1 | 1.08843 | 0.47086 | rcsB             |
| WP_000876011.1 | 1.31518 | 0.36109 | rcsC             |
| WP_000125282.1 | 1.6712  | 0.08359 | A1UI_02435       |
| WP_000012305.1 | 0.94103 | 0.75002 | ECMP0215528_2584 |
| WP_001281242.1 | 0.94827 | 0.90967 | gyrA             |
| WP_000990765.1 | 0.92177 | 0.54128 | ubiG             |
| WP_001075164.1 | 0.92497 | 0.74408 | ECMP0215528_2589 |
| WP_000332037.1 | 0.96996 | 0.9568  | DXE50_11490      |
| WP_000779105.1 | 0.91747 | 0.69199 | glpQ             |
| WP_000948731.1 | 0.82277 | 0.18394 | glpT             |
| WP_000857257.1 | 1.01912 | 0.94584 | glpA             |
| WP_001209927.1 | 0.95475 | 0.71268 | glpB             |
| WP_001000379.1 | 0.91998 | 0.62576 | A1UI_02458       |
| WP_000921621.1 | 1.07118 | 0.77473 | A1UI_02465       |
| WP_001300392.1 | 1.26006 | 0.32704 | A1UI_02466       |
| WP_000577625.1 | 1.51303 | 0.16417 | menE             |
| WP_001255628.1 | 1.0908  | 0.71603 | menC             |
| WP_000639996.1 | 1.1298  | 0.34876 | menB             |
| WP_001295284.1 | 0.96612 | 0.84668 | menD             |
| WP_001191419.1 | 0.74144 | 0.08488 | menF             |
| WP_000070621.1 | 1.03499 | 0.66738 | elaB             |
| WP_000574091.1 | 1.39616 | 0.1561  | EKN05_004155     |
| WP_001300687.1 | 1.11197 | 0.65568 | rbn              |
| WP_000156701.1 | 0.87505 | 0.43869 | nuoN             |
| WP_001056643.1 | 0.96229 | 0.8179  | nuoL             |
| WP_000612644.1 | 1.01975 | 0.96354 | nuoK             |
| WP_000172749.1 | 0.93321 | 0.59906 | nuoI             |
| WP_000118507.1 | 0.83169 | 0.2867  | nuoH             |
| WP_000190939.1 | 0.901   | 0.58148 | A1UI_02496       |
| WP_000789500.1 | 0.94706 | 0.90098 | WG3_01307        |
| WP_000545042.1 | 0.85706 | 0.26563 | nuoE             |
| AIN32696.1     | 0.95838 | 0.9819  | -                |
| WP_000386733.1 | 0.95503 | 0.71418 | nuoB             |
| WP_000062997.1 | 0.86386 | 0.39638 | nuoA             |

|                |         |         |                     |
|----------------|---------|---------|---------------------|
| WP_000622280.1 | 0.75267 | 0.16705 | <i>lrhA</i>         |
| WP_000074527.1 | 0.92248 | 0.54482 | <i>DXE50_11220</i>  |
| WP_000813859.1 | 1.05261 | 0.83252 | <i>yfbR</i>         |
| WP_001203392.1 | 1.18082 | 0.36296 | <i>A1UI_02507</i>   |
| WP_000426124.1 | 0.95567 | 0.96257 | <i>yfbU</i>         |
| WP_000095707.1 | 1.07318 | 0.52252 | <i>ackA</i>         |
| WP_000086722.1 | 1.04171 | 0.64038 | <i>EKN05_004025</i> |
| WP_000437935.1 | 0.98594 | 0.92729 | <i>yfcD</i>         |
| WP_000772452.1 | 1.27448 | 0.30362 | <i>DXE50_11170</i>  |
| WP_000042442.1 | 1.23341 | 0.37414 | <i>O3K_07990</i>    |
| WP_000068457.1 | 0.79027 | 0.09432 | <i>foiX</i>         |
| WP_001028341.1 | 1.31272 | 0.24809 | <i>A1UI_02518</i>   |
| WP_000737621.1 | 0.87205 | 0.32046 | <i>hisJ</i>         |
| WP_000334220.1 | 1.13007 | 0.60664 | <i>purF</i>         |
| WP_000146992.1 | 0.8793  | 0.52115 | <i>dedD</i>         |
| WP_000584546.1 | 0.89839 | 0.43061 | <i>A1UI_02530</i>   |
| WP_000118404.1 | 0.93667 | 0.82679 | <i>accD</i>         |
| WP_001283586.1 | 0.82385 | 0.34131 | <i>truA</i>         |
| WP_001289167.1 | 0.89327 | 0.4079  | <i>A1UI_02534</i>   |
| WP_000699148.1 | 1.01659 | 0.74451 | <i>pdxB</i>         |
| WP_000615834.1 | 1.28516 | 0.40396 | <i>A1UI_02536</i>   |
| WP_000817178.1 | 0.83789 | 0.24084 | <i>fabB</i>         |
| WP_000683799.1 | 1.03896 | 0.85861 | <i>mnmc</i>         |
| WP_000559764.1 | 0.87073 | 0.42213 | <i>DXE50_11045</i>  |
| WP_001043825.1 | 1.00321 | 0.9888  | <i>mepA</i>         |
| WP_001333535.1 | 1.0499  | 0.81187 | <i>aroC</i>         |
| WP_001300582.1 | 1.06643 | 0.74345 | <i>prmB</i>         |
| WP_000730806.1 | 1.12641 | 0.70027 | <i>smrB</i>         |
| WP_001195819.1 | 0.74198 | 0.14711 | <i>sixA</i>         |
| WP_000426176.1 | 1.09485 | 0.70426 | <i>fadJ</i>         |
| WP_000531952.1 | 1.13177 | 0.60217 | <i>fadI</i>         |
| WP_001296261.1 | 1.26369 | 0.19448 | <i>WG3_01240</i>    |
| WP_001295701.1 | 1.11543 | 0.38817 | <i>AC28_2640</i>    |
| WP_203277081.1 | 1.03011 | 0.89716 | -                   |
| WP_000958671.1 | 0.93925 | 0.74321 | <i>G925_02382</i>   |
| WP_000703651.1 | 1.03725 | 0.8818  | <i>KY274_06780</i>  |
| WP_001030215.1 | 0.99925 | 0.98848 | <i>KXD89_06785</i>  |
| WP_000556048.1 | 0.84898 | 0.41876 |                     |
| WP_000785931.1 | 1.03691 | 0.88291 | <i>DXE50_10435</i>  |
| WP_001295458.1 | 1.0018  | 0.98347 | <i>DXE50_10425</i>  |
| WP_000955906.1 | 0.74474 | 0.15209 | <i>A1UI_02584</i>   |
| WP_000170346.1 | 1.26782 | 0.10869 | <i>glk</i>          |
| WP_000376337.1 | 0.95579 | 0.7183  | <i>nupC</i>         |
| AIN32800.1     | 0.82082 | 0.33247 | -                   |
| WP_000695655.1 | 0.94497 | 0.88604 | <i>gltX</i>         |
| WP_000443661.1 | 1.12008 | 0.54326 | <i>ligA</i>         |
| WP_001300494.1 | 0.9852  | 0.87953 | <i>zipA</i>         |
| WP_000254839.1 | 0.87679 | 0.51237 | <i>cysZ</i>         |

|                |         |         |                         |
|----------------|---------|---------|-------------------------|
| WP_000034402.1 | 1.18953 | 0.21676 | <i>cysK</i>             |
| WP_000487600.1 | 0.93828 | 0.83824 | <i>HMPREF0454_04299</i> |
| WP_000623140.1 | 0.88673 | 0.49155 | <i>ptsl</i>             |
| WP_000522247.1 | 1.092   | 0.45926 | <i>DXE50_10250</i>      |
| WP_000096674.1 | 0.78696 | 0.16702 | <i>pdxK</i>             |
| WP_001336044.1 | 1.05944 | 0.811   | <i>cysM</i>             |
| WP_000290230.1 | 0.92427 | 0.55375 | <i>G711_02922</i>       |
| WP_000517431.1 | 0.90302 | 0.45162 | <i>ucpA</i>             |
| WP_000966470.1 | 0.83993 | 0.39001 | <i>murR</i>             |
| WP_001159160.1 | 1.02985 | 0.90599 | <i>murQ</i>             |
| WP_001327042.1 | 1.14866 | 0.65151 | <i>pbp4b</i>            |
| WP_001350538.1 | 0.98689 | 0.88883 | <i>yfeX</i>             |
| WP_000838944.1 | 0.9407  | 0.71873 | <i>EKN05_003410</i>     |
| WP_000405996.1 | 1.12742 | 0.69801 | <i>ypeA</i>             |
| WP_000102886.1 | 1.42065 | 0.23945 | <i>amiA</i>             |
| WP_000801365.1 | 1.06614 | 0.84349 | <i>hemF</i>             |
| WP_001111023.1 | 1.16649 | 0.61414 | <i>A1UI_02631</i>       |
| WP_000372316.1 | 1.0459  | 0.89493 | <i>eutC</i>             |
| WP_000769961.1 | 1.05207 | 0.87908 | <i>eutB</i>             |
| WP_010723125.1 | 1.19146 | 0.45876 | <i>yffS</i>             |
| WP_000387713.1 | 0.79896 | 0.27235 | <i>eutM</i>             |
| WP_000342644.1 | 1.04063 | 0.64467 | <i>maeB</i>             |
| WP_000258236.1 | 1.55813 | 0.05912 | <i>KXD89_06205</i>      |
| WP_001277801.1 | 1.42778 | 0.13003 | <i>dapE</i>             |
| WP_000679799.1 | 1.17167 | 0.60356 | <i>ypfH</i>             |
| WP_001267498.1 | 0.98767 | 0.93526 | <i>DXE50_09995</i>      |
| WP_001295467.1 | 0.95145 | 0.9324  | <i>purC</i>             |
| WP_001297320.1 | 1.00867 | 0.77897 | <i>bamC</i>             |
| WP_001311023.1 | 0.9517  | 0.93415 | <i>dapA</i>             |
| WP_000176187.1 | 0.9853  | 0.88006 | <i>EKN05_003185</i>     |
| WP_001068682.1 | 0.81109 | 0.14676 | <i>EKN05_003180</i>     |
| WP_000489667.1 | 1.28526 | 0.28702 | <i>bepA</i>             |
| WP_000166446.1 | 1.00122 | 0.96785 | <i>arsC</i>             |
| WP_001307333.1 | 0.90707 | 0.62162 | <i>hda</i>              |
| WP_000198328.1 | 0.7067  | 0.09262 | <i>uraA</i>             |
| WP_001295473.1 | 0.77533 | 0.06619 | <i>upp</i>              |
| WP_001336050.1 | 1.00042 | 0.96347 | <i>purM</i>             |
| WP_001028612.1 | 0.85519 | 0.439   | <i>purN</i>             |
| WP_000529576.1 | 1.12344 | 0.53198 | <i>ppk1</i>             |
| WP_001121363.1 | 0.97549 | 0.82592 | <i>O3K_06910</i>        |
| WP_000076001.1 | 1.23994 | 0.47621 | <i>O3K_06895</i>        |
| WP_000138270.1 | 0.81645 | 0.16311 | <i>guaA</i>             |
| WP_001299507.1 | 0.88395 | 0.47478 | <i>guaB</i>             |
| WP_000937912.1 | 0.90682 | 0.56856 | <i>xseA</i>             |
| WP_001301158.1 | 1.02227 | 0.95683 | <i>KXD89_06000</i>      |
| WP_000249410.1 | 1.06411 | 0.75287 | <i>engA</i>             |
| WP_001177052.1 | 1.09114 | 0.46203 | <i>bamB</i>             |
| WP_000409205.1 | 1.0171  | 0.95489 | <i>DXE50_09780</i>      |

|                |         |         |                    |
|----------------|---------|---------|--------------------|
| WP_001107167.1 | 0.95132 | 0.93145 | <i>hisS</i>        |
| WP_000551807.1 | 0.88355 | 0.47235 | <i>ispG</i>        |
| WP_001090866.1 | 1.13607 | 0.49087 | <i>rodZ</i>        |
| WP_000003317.1 | 0.81154 | 0.13628 | <i>trmG/rlmN</i>   |
| WP_000963837.1 | 1.10469 | 0.41972 | <i>ndk</i>         |
| WP_000736312.1 | 0.98936 | 0.90248 | <i>yfhM</i>        |
| WP_000108626.1 | 1.23555 | 0.24251 | <i>sseA</i>        |
| WP_001295479.1 | 0.99071 | 0.9493  | <i>sseB</i>        |
| WP_000523616.1 | 1.13995 | 0.58089 | <i>iscX</i>        |
| WP_001124469.1 | 1.43    | 0.12835 | <i>fdx</i>         |
| WP_001196613.1 | 1.35691 | 0.08833 | <i>hscA</i>        |
| WP_000384413.1 | 0.78642 | 0.16581 | <i>hscB</i>        |
| WP_000028953.1 | 0.94454 | 0.7362  | <i>iscA</i>        |
| WP_000331707.1 | 0.79767 | 0.11094 | <i>iscU</i>        |
| WP_001295373.1 | 0.94137 | 0.86032 | <i>iscS</i>        |
| WP_001241357.1 | 1.22067 | 0.27156 | <i>iscR</i>        |
| WP_000940019.1 | 0.97095 | 0.80094 | <i>trmJ</i>        |
| WP_000553451.1 | 1.07898 | 0.50247 | <i>suhB</i>        |
| WP_000982994.1 | 0.83756 | 0.38265 | <i>csiE</i>        |
| WP_000919159.1 | 0.97189 | 0.94767 | <i>glyA</i>        |
| WP_000717694.1 | 0.83192 | 0.18729 | <i>glnB</i>        |
| WP_001295369.1 | 1.1088  | 0.66452 | <i>A1UI_02746</i>  |
| WP_001215861.1 | 1.43173 | 0.22904 | <i>qseG</i>        |
| WP_000970102.1 | 1.03612 | 0.87093 | <i>purL</i>        |
| WP_001013779.1 | 0.95278 | 0.79524 | <i>DXE50_09565</i> |
| WP_001297412.1 | 1.0606  | 0.76724 | <i>pdxJ</i>        |
| WP_000020749.1 | 0.85215 | 0.24899 | <i>era</i>         |
| WP_001068343.1 | 0.98012 | 0.85145 | <i>rnc</i>         |
| WP_000002541.1 | 1.03195 | 0.89912 | <i>lepB</i>        |
| WP_000790168.1 | 1.00091 | 0.8135  | <i>lepA</i>        |
| WP_000812053.1 | 1.05425 | 0.82733 | <i>rseB</i>        |
| WP_001168459.1 | 0.93867 | 0.70947 | <i>rseA</i>        |
| WP_001295364.1 | 1.52798 | 0.15424 | <i>rpoE</i>        |
| WP_001094491.1 | 1.04256 | 0.86461 | <i>nadB</i>        |
| WP_001295363.1 | 0.77599 | 0.21627 | <i>trmN</i>        |
| WP_000219203.1 | 1.04573 | 0.82956 | <i>srmB</i>        |
| WP_000627807.1 | 1.12902 | 0.35081 | <i>grcA</i>        |
| WP_001262716.1 | 1.12128 | 0.63017 | <i>ung</i>         |
| WP_000997403.1 | 0.90984 | 0.64005 | <i>DXE50_09455</i> |
| WP_001098726.1 | 0.9575  | 0.79576 | <i>trxC</i>        |
| WP_001300438.1 | 0.70805 | 0.0944  | <i>A1UI_02775</i>  |
| WP_000083005.1 | 1.14827 | 0.5598  | <i>pat</i>         |
| WP_000949265.1 | 1.08856 | 0.65651 | <i>pssA</i>        |
| WP_000841103.1 | 1.16769 | 0.5126  | <i>kgtP</i>        |
| WP_001235102.1 | 1.03119 | 0.68293 | <i>clpB</i>        |
| WP_000040169.1 | 1.19316 | 0.45507 | <i>pgeF</i>        |
| WP_000079100.1 | 1.1375  | 0.48635 | <i>rluD</i>        |
| WP_000197686.1 | 0.96121 | 0.99864 | <i>bamD</i>        |

|                |         |         |             |
|----------------|---------|---------|-------------|
| WP_000200120.1 | 0.96535 | 0.77023 | A1UI_02786  |
| WP_000225229.1 | 1.01243 | 0.96396 | <i>tyrA</i> |
| WP_001168037.1 | 0.92162 | 0.6761  | <i>aroF</i> |
| pdb 6H58 PP    | 0.82254 | 0.18316 | -           |
| WP_000264777.1 | 1.1373  | 0.58773 | <i>trmD</i> |
| WP_000043335.1 | 0.88733 | 0.3823  | <i>rimM</i> |
| WP_000256450.1 | 0.98102 | 0.90466 | <i>rpsP</i> |
| WP_000460035.1 | 0.89165 | 0.52183 | <i>ffh</i>  |
| WP_001393454.1 | 1.04405 | 0.6311  | <i>grpE</i> |
| WP_001059169.1 | 1.07177 | 0.82946 | <i>nadK</i> |
| WP_001117838.1 | 0.89785 | 0.5877  | DXE50_09280 |
| WP_001300750.1 | 1.06657 | 0.84242 | <i>ratA</i> |
| WP_000162574.1 | 1.06712 | 0.78717 | <i>smpB</i> |
| WP_000101723.1 | 0.93909 | 0.7426  | KXD89_05435 |
| WP_000155570.1 | 0.97919 | 0.89708 | <i>mIA</i>  |
| WP_000993126.1 | 1.16669 | 0.40038 | <i>csiD</i> |
| WP_000772831.1 | 1.30591 | 0.07583 | <i>gabD</i> |
| WP_001087611.1 | 1.30406 | 0.07719 | <i>gabT</i> |
| WP_001229442.1 | 1.13745 | 0.67578 | A1UI_02878  |
| WP_000115383.1 | 1.03327 | 0.88333 | <i>stpA</i> |
| WP_001295174.1 | 1.14049 | 0.57952 | DXE50_18090 |
| WP_000985494.1 | 0.97507 | 0.93261 | <i>proV</i> |
| WP_000774988.1 | 0.99532 | 0.93538 | <i>proW</i> |
| WP_001216525.1 | 0.90089 | 0.58076 | DXE50_18140 |
| WP_000378442.1 | 0.9925  | 0.91983 | <i>emrR</i> |
| WP_001326681.1 | 0.94004 | 0.71571 | <i>emrA</i> |
| WP_001130211.1 | 1.32891 | 0.06059 | <i>luxS</i> |
| WP_000611804.1 | 1.03727 | 0.86594 | <i>gshA</i> |
| WP_000273290.1 | 1.08776 | 0.79032 | A1UI_02899  |
| WP_000906486.1 | 1.13704 | 0.48782 | <i>csrA</i> |
| WP_000047184.1 | 0.95644 | 0.96805 | <i>alaS</i> |
| WP_000963143.1 | 1.2193  | 0.16814 | <i>recA</i> |
| WP_000132231.1 | 0.99248 | 0.9197  | <i>pncC</i> |
| WP_001295177.1 | 1.11995 | 0.63377 | <i>mltB</i> |
| WP_000148878.1 | 0.75692 | 0.10856 | <i>srIE</i> |
| WP_000216194.1 | 0.76981 | 0.06372 | A1UI_02912  |
| WP_001077358.1 | 0.79681 | 0.10605 | <i>srID</i> |
| WP_000804550.1 | 0.88323 | 0.47084 | <i>srIR</i> |
| WP_001287420.1 | 1.09011 | 0.65065 | WG3_03337   |
| WP_001394680.1 | 1.34031 | 0.32815 | <i>ascG</i> |
| WP_000337665.1 | 1.17646 | 0.59389 | <i>hypB</i> |
| WP_001212985.1 | 1.44872 | 0.21384 | <i>hypD</i> |
| WP_001272928.1 | 0.96503 | 0.76848 | <i>mutS</i> |
| WP_001272592.1 | 1.39434 | 0.06291 | <i>nlpD</i> |
| WP_000254708.1 | 1.2972  | 0.3863  | <i>pcm</i>  |
| WP_001295182.1 | 0.95063 | 0.76412 | <i>surE</i> |
| WP_000568943.1 | 0.92631 | 0.65384 | <i>truD</i> |
| WP_001219242.1 | 0.91311 | 0.49903 | <i>ispF</i> |

|                |         |         |                         |
|----------------|---------|---------|-------------------------|
| WP_000246138.1 | 0.92314 | 0.68185 | <i>ispD</i>             |
| WP_000517476.1 | 0.9756  | 0.88324 | <i>ftsB</i>             |
| WP_001173673.1 | 1.19632 | 0.555   | <i>cysC</i>             |
| WP_001090361.1 | 1.04254 | 0.8432  | <i>cysN</i>             |
| WP_000372108.1 | 0.92547 | 0.65009 | <i>cysD</i>             |
| WP_000039850.1 | 1.04551 | 0.85515 | <i>cysH</i>             |
| WP_001290679.1 | 1.0656  | 0.7468  | <i>cysI</i>             |
| WP_000211913.1 | 1.07105 | 0.7248  | <i>cysJ</i>             |
| WP_000108294.1 | 0.95664 | 0.7918  | <i>queD</i>             |
| WP_000036723.1 | 0.85492 | 0.31701 | <i>eno</i>              |
| WP_000210878.1 | 0.89381 | 0.53541 | <i>pyrG</i>             |
| WP_001071648.1 | 1.34612 | 0.32091 | <i>mazG</i>             |
| WP_000254738.1 | 0.76739 | 0.1972  | <i>A1UI_02996</i>       |
| WP_000226815.1 | 1.02108 | 0.93501 | <i>DXE50_18695</i>      |
| WP_000046812.1 | 1.05836 | 0.86307 | <i>rumA</i>             |
| WP_000186450.1 | 1.11055 | 0.73642 | <i>barA</i>             |
| WP_000098255.1 | 1.28276 | 0.29079 | <i>gudD</i>             |
| WP_000807753.1 | 1.07399 | 0.7131  | <i>EKN05_002460</i>     |
| WP_000206990.1 | 1.00779 | 0.9796  | <i>ECMP0215528_3251</i> |
| WP_000342431.1 | 1.3304  | 0.34082 | <i>syd</i>              |
| WP_000100421.1 | 0.90839 | 0.5753  | <i>queF</i>             |
| WP_000627995.1 | 1.12159 | 0.37088 | <i>ppnN</i>             |
| WP_000450476.1 | 0.88077 | 0.35507 | <i>DXE50_18755</i>      |
| WP_000013588.1 | 1.18063 | 0.48275 | <i>fucO</i>             |
| WP_000724153.1 | 1.05581 | 0.82242 | <i>fucl</i>             |
| WP_000920840.1 | 1.24973 | 0.34471 | <i>fucU</i>             |
| WP_000642344.1 | 0.95771 | 0.81426 | <i>fucR</i>             |
| WP_001045520.1 | 0.98232 | 0.91059 | <i>rlmM</i>             |
| WP_000044401.1 | 0.99659 | 0.9637  | <i>gcvA</i>             |
| WP_000750398.1 | 0.83743 | 0.30489 | <i>DXE50_18820</i>      |
| WP_001300698.1 | 0.97257 | 0.87157 | <i>O3K_05445</i>        |
| WP_000184261.1 | 0.96752 | 0.84209 | <i>A1UI_03026</i>       |
| WP_000117728.1 | 0.89311 | 0.5109  | <i>O3K_05435</i>        |
| WP_000678646.1 | 0.95395 | 0.77938 | <i>mltA</i>             |
| WP_001138201.1 | 0.94143 | 0.72205 | <i>ptrA</i>             |
| WP_000946938.1 | 0.94018 | 0.7468  | <i>recC</i>             |
| WP_000816232.1 | 1.26197 | 0.32386 | <i>thyA</i>             |
| WP_000204658.1 | 0.96918 | 0.84976 | <i>lgt</i>              |
| WP_000957910.1 | 0.92602 | 0.56252 | <i>EL76_1009</i>        |
| WP_000564489.1 | 0.95422 | 0.8008  | <i>rppH</i>             |
| WP_001199295.1 | 1.15793 | 0.42496 | <i>EKN05_001155</i>     |
| WP_000899054.1 | 0.72085 | 0.05953 | <i>aas</i>              |
| WP_000201063.1 | 0.99256 | 0.94834 | <i>A311_03510</i>       |
| WP_001120711.1 | 0.71058 | 0.09779 | <i>lysA</i>             |
| WP_000848659.1 | 1.03134 | 0.89179 | <i>ygeA</i>             |
| WP_000256438.1 | 1.08056 | 0.49708 | <i>DXE50_18990</i>      |
| WP_000603502.1 | 1.12956 | 0.608   | <i>HMPREF1620_04171</i> |
| WP_000383237.1 | 1.2067  | 0.53542 | <i>kdul</i>             |

|                |         |         |                  |
|----------------|---------|---------|------------------|
| WP_000656030.1 | 0.79923 | 0.1959  | KXD89_04355      |
| WP_000065950.1 | 0.8269  | 0.272   | DXE50_19010      |
| WP_001301085.1 | 0.69628 | 0.0797  | ECMP0215528_3346 |
| WP_000417791.1 | 0.84713 | 0.41282 | A1UI_03071       |
| WP_000502395.1 | 1.15547 | 0.63706 | ygfK             |
| WP_001192820.1 | 1.30868 | 0.37003 | idi              |
| WP_000003071.1 | 0.96519 | 0.97954 | lysS             |
| WP_010723217.1 | 0.9896  | 0.86485 | prfB             |
| WP_000813200.1 | 0.96019 | 0.80819 | recJ             |
| WP_000715214.1 | 0.84558 | 0.22774 | dsbC             |
| WP_000806638.1 | 1.11667 | 0.72233 | xerD             |
| WP_001055874.1 | 0.83566 | 0.19787 | fldB             |
| WP_000354046.1 | 1.33009 | 0.22583 | sdhE             |
| WP_000886062.1 | 1.07418 | 0.51902 | ygfZ             |
| QRG61511.1     | 1.18797 | 0.34505 | -                |
| WP_000195062.1 | 0.79551 | 0.10584 | gcvP             |
| WP_000068701.1 | 0.77888 | 0.07218 | gcvT             |
| WP_001192229.1 | 1.114   | 0.65007 | ubil             |
| WP_000111195.1 | 1.60437 | 0.11159 | ubiH             |
| WP_001290136.1 | 1.18123 | 0.3619  | pepP             |
| WP_001295378.1 | 0.86812 | 0.41225 | ygfB             |
| WP_001276008.1 | 1.02403 | 0.92523 | zapA             |
| WP_001151604.1 | 0.88417 | 0.47606 | DXE50_19325      |
| WP_000189743.1 | 0.94454 | 0.88297 | rpiA             |
| WP_000828351.1 | 0.99858 | 0.9854  | argP             |
| WP_000669834.1 | 1.07622 | 0.51194 | DXE50_19370      |
| WP_000389818.1 | 1.0984  | 0.43901 | mscS             |
| WP_000034372.1 | 0.92259 | 0.72742 | fbaA             |
| WP_000111269.1 | 0.91938 | 0.70521 | pgk              |
| WP_000218480.1 | 1.03837 | 0.86116 | epd              |
| WP_000098614.1 | 0.9174  | 0.69154 | ECMP0215528_3427 |
| WP_000105566.1 | 0.92297 | 0.73014 | speB             |
| WP_001300904.1 | 0.98091 | 0.90517 | speA             |
| WP_001062128.1 | 1.02225 | 0.72031 | metK             |
| WP_001222509.1 | 0.97499 | 0.82316 | rsmE             |
| WP_000593273.1 | 1.0052  | 0.79434 | gshB             |
| WP_001053178.1 | 0.98693 | 0.88908 | yqgE             |
| WP_000017106.1 | 1.02042 | 0.96174 | yqgF             |
| WP_000997795.1 | 0.85003 | 0.24199 | yggS             |
| WP_001094831.1 | 0.9601  | 0.74165 | yggT             |
| WP_001174777.1 | 0.91436 | 0.50507 | A1UI_03160       |
| WP_000239943.1 | 1.10151 | 0.75753 | A1UI_03161       |
| WP_000984796.1 | 1.06997 | 0.72915 | DXE50_19655      |
| WP_001107564.1 | 0.88735 | 0.49533 | DXE50_19660      |
| WP_000786911.1 | 1.07689 | 0.50962 | trmB             |
| WP_000091700.1 | 0.94561 | 0.89062 | yggX             |
| WP_000760323.1 | 1.29862 | 0.38426 | mltC             |
| WP_001049791.1 | 1.0832  | 0.80137 | nupG             |

|                |         |         |                  |
|----------------|---------|---------|------------------|
| WP_001326492.1 | 0.85629 | 0.36895 | A1UI_03171       |
| WP_000084131.1 | 1.00433 | 0.79821 | <i>glcB</i>      |
| WP_000853256.1 | 1.01126 | 0.9811  | DXE50_19835      |
| WP_001297764.1 | 0.87408 | 0.50292 | ECMP0215528_3474 |
| WP_001297309.1 | 1.14967 | 0.4491  | EKN05_000500     |
| WP_001295515.1 | 1.40249 | 0.05834 | ECMP0215528_3491 |
| WP_001221939.1 | 1.54416 | 0.14411 | A1UI_03277       |
| WP_000083065.1 | 1.29023 | 0.27962 | <i>hybC</i>      |
| WP_000262172.1 | 1.14796 | 0.45421 | AB05_3609        |
| WP_000439331.1 | 1.14098 | 0.57826 | <i>yqhA</i>      |
| WP_000018760.1 | 1.19011 | 0.3398  | ECMP0215528_3505 |
| WP_001240712.1 | 0.75711 | 0.10887 | <i>exbD</i>      |
| WP_000527844.1 | 0.76883 | 0.06248 | DXE50_20010      |
| WP_001301079.1 | 1.54333 | 0.06482 | G894_03028       |
| WP_000268419.1 | 1.4819  | 0.18673 | DXE50_20020      |
| WP_001058802.1 | 0.95878 | 0.9847  | <i>yqhD</i>      |
| WP_000095187.1 | 0.92179 | 0.63376 | <i>ygiQ</i>      |
| WP_000059388.1 | 0.95324 | 0.77615 | <i>ftsP</i>      |
| WP_000965722.1 | 0.92072 | 0.62902 | A1UI_03298       |
| WP_001281881.1 | 0.96355 | 0.7604  | <i>parC</i>      |
| WP_001295629.1 | 1.23444 | 0.24459 | A1UI_03300       |
| WP_001221495.1 | 1.25505 | 0.33553 | <i>qseB</i>      |
| WP_000673402.1 | 1.11814 | 0.71898 | A1UI_03306       |
| WP_000065430.1 | 0.95276 | 0.70197 | <i>mdaB</i>      |
| WP_000958598.1 | 1.1047  | 0.59692 | DXE50_20115      |
| WP_000195296.1 | 0.94568 | 0.66419 | <i>parE</i>      |
| WP_000444747.1 | 1.00549 | 0.98738 | <i>cpdA</i>      |
| WP_000917117.1 | 0.93369 | 0.68693 | DXE50_20140      |
| WP_000831543.1 | 1.00905 | 0.97536 | <i>ygiB</i>      |
| WP_000442860.1 | 1.10978 | 0.57884 | DXE50_20155      |
| WP_001076997.1 | 1.25156 | 0.21411 | <i>ribB</i>      |
| WP_001295626.1 | 0.92386 | 0.55172 | <i>ubiK</i>      |
| WP_000350095.1 | 1.15819 | 0.63134 | <i>glgS</i>      |
| WP_000869178.1 | 1.03179 | 0.68047 | <i>hldE</i>      |
| WP_001301081.1 | 1.0432  | 0.84037 | <i>glnE</i>      |
| WP_000708487.1 | 1.0962  | 0.70034 | <i>cca</i>       |
| WP_001295541.1 | 0.93275 | 0.68268 | <i>folB</i>      |
| WP_001264352.1 | 0.88736 | 0.38245 | <i>tsaD</i>      |
| pdb 6H58 uu    | 0.79382 | 0.10198 | -                |
| WP_000918827.1 | 0.82238 | 0.33699 | <i>dnaG</i>      |
| WP_000437376.1 | 1.02152 | 0.72343 | <i>rpoD</i>      |
| WP_000228937.1 | 1.13654 | 0.58971 | <i>mug</i>       |
| WP_000018003.1 | 0.98247 | 0.91128 | EKN05_000130     |
| WP_000094721.1 | 1.60313 | 0.11219 | HMPREF1599_02928 |
| WP_001301395.1 | 1.18725 | 0.57253 | <i>ygjG</i>      |
| WP_000450594.1 | 0.81404 | 0.31316 | HMPREF1599_02930 |
| WP_000212475.1 | 1.17797 | 0.48879 | HMPREF1599_02931 |
| WP_000695487.1 | 0.96216 | 0.83142 | <i>ygjK</i>      |



|                |         |         |                         |
|----------------|---------|---------|-------------------------|
| WP_000018695.1 | 0.97376 | 0.87098 | <i>rlmG</i>             |
| WP_000617698.1 | 0.98839 | 0.9386  | <i>KXD89_03155</i>      |
| WP_001098806.1 | 0.67892 | 0.06112 | <i>ECMP0215528_3592</i> |
| WP_000211655.1 | 1.04169 | 0.90583 | <i>sstT</i>             |
| WP_001199390.1 | 1.60044 | 0.11349 | <i>HMPREF1599_02950</i> |
| WP_000187442.1 | 1.07203 | 0.7209  | <i>uxaC</i>             |
| WP_000406488.1 | 0.91969 | 0.6245  | <i>exuR</i>             |
| WP_001295543.1 | 1.06115 | 0.85604 | <i>DXE50_20445</i>      |
| WP_000096091.1 | 1.54683 | 0.1425  | <i>HMPREF1599_02960</i> |
| WP_000531213.1 | 1.37888 | 0.28255 | <i>HMPREF1599_02962</i> |
| WP_001041009.1 | 1.14799 | 0.5605  | <i>DXE50_20485</i>      |
| WP_000622126.1 | 0.79908 | 0.27267 | <i>A1UI_03392</i>       |
| WP_000719990.1 | 0.96482 | 0.76734 | <i>DXE50_20515</i>      |
| WP_000861734.1 | 0.76558 | 0.12365 | <i>O3K_03370</i>        |
| WP_000107723.1 | 0.91052 | 0.63446 | <i>tdcC</i>             |
| WP_001307405.1 | 1.33437 | 0.3357  | <i>O3K_03300</i>        |
| WP_000072187.1 | 0.9107  | 0.63514 | <i>DXE50_20600</i>      |
| WP_001336162.1 | 1.31749 | 0.35795 | <i>agaV</i>             |
| WP_000809262.1 | 0.86695 | 0.30113 | <i>rsml</i>             |
| WP_000249104.1 | 0.92075 | 0.53625 | <i>lpoA</i>             |
| WP_001158034.1 | 0.78199 | 0.15614 | <i>diaA</i>             |
| WP_000646033.1 | 1.08734 | 0.66115 | <i>ECMP0215528_3660</i> |
| WP_000147574.1 | 1.36264 | 0.30105 | <i>A1UI_03435</i>       |
| WP_001300423.1 | 1.14433 | 0.66082 | <i>A1UI_03436</i>       |
| WP_000908554.1 | 1.0288  | 0.90293 | <i>DXE50_20720</i>      |
| WP_001295552.1 | 0.84861 | 0.41756 | <i>ubiT</i>             |
| WP_000130380.1 | 1.01555 | 0.95347 | <i>O3K_03135</i>        |
| WP_000224351.1 | 0.96026 | 0.82407 | <i>DXE50_20745</i>      |
| WP_001295553.1 | 0.9968  | 0.83199 | <i>deaD</i>             |
| WP_000802080.1 | 0.9786  | 0.89338 | <i>nlpI</i>             |
| WP_001295554.1 | 0.95436 | 0.95321 | <i>pnp</i>              |
| WP_000089698.1 | 0.86335 | 0.39453 | <i>truB</i>             |
| WP_001040205.1 | 1.00792 | 0.7823  | <i>rbfA</i>             |
| WP_000133044.1 | 1.03721 | 0.65839 | <i>infB</i>             |
| WP_001031057.1 | 0.95611 | 0.96571 | <i>nusA</i>             |
| WP_001300397.1 | 0.90407 | 0.4565  | <i>rimP</i>             |
| WP_000207680.1 | 1.33546 | 0.05679 | <i>argG</i>             |
| WP_001295556.1 | 0.94819 | 0.67753 | <i>secG</i>             |
| WP_000071134.1 | 0.92215 | 0.72436 | <i>glmM</i>             |
| WP_000764731.1 | 1.12615 | 0.52297 | <i>folP</i>             |
| WP_001107467.1 | 0.99334 | 0.84775 | <i>ftsH</i>             |
| WP_000145975.1 | 1.01285 | 0.96256 | <i>rlmE</i>             |
| WP_001054420.1 | 0.78554 | 0.16385 | <i>yhbY</i>             |
| WP_001148001.1 | 0.98007 | 0.90911 | <i>greA</i>             |
| WP_001212619.1 | 0.96331 | 0.8226  | <i>WG3_03920</i>        |
| WP_000673575.1 | 0.90028 | 0.43914 | <i>cgtA</i>             |
| pdb 6H58 WW    | 0.77099 | 0.05942 | -                       |
| WP_000271401.1 | 0.9449  | 0.88549 | <i>rplU</i>             |

|                |         |         |                     |
|----------------|---------|---------|---------------------|
| WP_001047336.1 | 0.80322 | 0.11855 | <i>ispB</i>         |
| WP_000357259.1 | 0.9125  | 0.65801 | <i>murA</i>         |
| WP_000429656.1 | 0.73331 | 0.07408 | <i>ibaG</i>         |
| WP_000004488.1 | 1.21355 | 0.41257 | <i>mIaB</i>         |
| WP_000476487.1 | 1.16128 | 0.27304 | <i>mIaC</i>         |
| WP_001296448.1 | 1.23207 | 0.24908 | <i>mIaD</i>         |
| WP_000925795.1 | 1.20725 | 0.42536 | <i>mIaE</i>         |
| WP_000438245.1 | 1.53797 | 0.067   | <i>mIaF</i>         |
| WP_001295557.1 | 0.98132 | 0.85808 | <i>kdsD</i>         |
| WP_000030005.1 | 1.09739 | 0.62351 | <i>kdsC</i>         |
| WP_000030537.1 | 1.02787 | 0.91252 | <i>lptC</i>         |
| WP_000669785.1 | 0.99437 | 0.93014 | <i>lptA</i>         |
| WP_000224099.1 | 1.10111 | 0.60989 | <i>lptB</i>         |
| WP_000809057.1 | 1.13619 | 0.5906  | <i>rpoN</i>         |
| WP_001176599.1 | 1.39991 | 0.15278 | <i>DXE50_20960</i>  |
| WP_000183676.1 | 0.8531  | 0.25214 | <i>ptsN</i>         |
| WP_000243741.1 | 1.11752 | 0.55199 | <i>rapZ</i>         |
| WP_001300411.1 | 1.08893 | 0.46923 | <i>elbB</i>         |
| WP_000809774.1 | 0.96455 | 0.76589 | <i>arcB</i>         |
| WP_000054239.1 | 0.84213 | 0.21704 | <i>nanE</i>         |
| WP_000108454.1 | 0.73214 | 0.0726  | <i>nanT</i>         |
| WP_000523845.1 | 0.88501 | 0.47796 | <i>nanR</i>         |
| WP_000366129.1 | 1.04911 | 0.84363 | <i>sspB</i>         |
| WP_000257293.1 | 1.01306 | 0.75977 | <i>sspA</i>         |
| WP_000829818.1 | 0.87681 | 0.43293 | <i>rpsI</i>         |
| WP_000847559.1 | 0.89324 | 0.53181 | <i>rplM</i>         |
| WP_001192332.1 | 0.88128 | 0.4631  | <i>zapE</i>         |
| WP_001295270.1 | 0.94112 | 0.85852 | <i>DXE50_21085</i>  |
| WP_001295271.1 | 1.01302 | 0.9732  | <i>degQ</i>         |
| WP_000497723.1 | 1.18585 | 0.57526 | <i>DXE50_21095</i>  |
| WP_001295272.1 | 1.07112 | 0.52979 | <i>mdh</i>          |
| WP_001257846.1 | 0.89371 | 0.40985 | <i>argR</i>         |
| WP_000055909.1 | 0.97701 | 0.83431 | <i>tIdD</i>         |
| WP_001253618.1 | 0.84257 | 0.39829 | <i>yhdP</i>         |
| WP_000123197.1 | 1.09228 | 0.64248 | <i>DXE50_21150</i>  |
| WP_000203105.1 | 1.13119 | 0.6037  | <i>A1UI_03526</i>   |
| WP_000802511.1 | 0.95799 | 0.79803 | <i>WG3_03983</i>    |
| WP_000913396.1 | 0.93526 | 0.8167  | <i>mreB</i>         |
| WP_001241469.1 | 1.20309 | 0.54217 | <i>A1UI_03530</i>   |
| WP_001148481.1 | 1.14902 | 0.30083 | <i>EL76_0511</i>    |
| WP_000884639.1 | 0.95213 | 0.93722 | <i>accC</i>         |
| WP_001175728.1 | 1.12438 | 0.70484 | <i>panF</i>         |
| WP_001145827.1 | 1.09616 | 0.62805 | <i>prmA</i>         |
| WP_000462905.1 | 1.05662 | 0.7837  | <i>fis</i>          |
| WP_001286216.1 | 1.18425 | 0.2265  | <i>EKN05_022560</i> |
| WP_000451243.1 | 1.01544 | 0.95383 | <i>aroE</i>         |
| WP_001301412.1 | 0.84471 | 0.32886 | <i>tsaC</i>         |
| WP_001129722.1 | 0.9702  | 0.86245 | <i>A1UI_03556</i>   |

|                |         |         |                    |
|----------------|---------|---------|--------------------|
| WP_000114984.1 | 0.97423 | 0.81895 | <i>def</i>         |
| WP_000004473.1 | 1.01505 | 0.96406 | <i>fmt</i>         |
| WP_000744778.1 | 0.93813 | 0.62453 | <i>rsmB</i>        |
| WP_000691382.1 | 1.1033  | 0.68001 | <i>trkA</i>        |
| WP_000022442.1 | 1.16824 | 0.39613 | <i>mscL</i>        |
| WP_000285607.1 | 0.80975 | 0.30124 | <i>zntR</i>        |
| WP_001216368.1 | 1.02364 | 0.71443 | <i>rplQ</i>        |
| WP_001162094.1 | 0.99897 | 0.82219 | <i>rpoA</i>        |
| pdb 7OI0 D     | 0.97051 | 0.95421 | -                  |
| pdb 6H58 kk    | 0.83955 | 0.24772 | -                  |
| pdb 6H58 mm    | 0.92864 | 0.76983 | -                  |
| WP_001118861.1 | 0.90465 | 0.45915 | <i>secY</i>        |
| pdb 6H58 LL    | 0.85285 | 0.30711 | -                  |
| pdb 6H58 ZZ    | 0.78675 | 0.08691 | -                  |
| pdb 7OE0 E     | 0.97401 | 0.9376  | -                  |
| pdb 6H58 OO    | 0.92819 | 0.7667  | -                  |
| pdb 6H58 GG    | 0.93849 | 0.83974 | -                  |
| WP_000062611.1 | 0.84431 | 0.26806 | <i>rpsH</i>        |
| pdb 7OE0 N     | 0.88676 | 0.49171 | -                  |
| WP_001096200.1 | 0.87431 | 0.41871 | <i>rplE</i>        |
| WP_000729185.1 | 1.00655 | 0.78835 | <i>rplX</i>        |
| WP_000613955.1 | 0.87788 | 0.43909 | <i>rplN</i>        |
| pdb 6H58 qq    | 0.89272 | 0.52854 | -                  |
| WP_000644741.1 | 0.89748 | 0.55876 | <i>rpmC</i>        |
| WP_000941212.1 | 0.90928 | 0.63629 | <i>rplP</i>        |
| pdb 7OE0 C     | 1.00222 | 0.80759 | -                  |
| WP_000447529.1 | 1.05715 | 0.58071 | <i>rplV</i>        |
| pdb 6H58 ss    | 0.92011 | 0.71023 | -                  |
| pdb 6H58 CC    | 0.89626 | 0.55092 | -                  |
| WP_000617544.1 | 0.80855 | 0.13941 | <i>rplW</i>        |
| WP_000424395.1 | 0.92512 | 0.74513 | <i>rplD</i>        |
| WP_000579833.1 | 0.92944 | 0.77552 | <i>rplC</i>        |
| WP_001181004.1 | 0.96326 | 0.98878 | <i>rpsJ</i>        |
| WP_000675504.1 | 1.22793 | 0.15588 | <i>bfr</i>         |
| WP_000031784.1 | 0.93475 | 0.81313 | <i>tuf</i>         |
| WP_000124700.1 | 0.90292 | 0.59404 | <i>fusA</i>        |
| pdb 7OE0 G     | 0.88097 | 0.45708 | -                  |
| pdb 7OI0 L     | 0.87828 | 0.44138 | -                  |
| WP_000903373.1 | 1.42639 | 0.234   | <i>tusB</i>        |
| WP_000820714.1 | 0.7291  | 0.12524 | <i>tusC</i>        |
| WP_000091466.1 | 1.02393 | 0.92445 | <i>DXE50_21575</i> |
| WP_000838250.1 | 1.08962 | 0.46696 | <i>A1UI_03620</i>  |
| WP_001153615.1 | 0.87565 | 0.44104 | <i>slyX</i>        |
| WP_000861334.1 | 0.94707 | 0.90107 | <i>DXE50_21590</i> |
| WP_001007730.1 | 1.38017 | 0.17097 | <i>DXE50_21595</i> |
| WP_000634798.1 | 0.90114 | 0.44306 | <i>DXE50_21610</i> |
| WP_000057356.1 | 0.84479 | 0.40534 | <i>A1UI_03627</i>  |
| WP_001274680.1 | 1.01082 | 0.98311 | <i>DXE50_21625</i> |

|                |         |         |                         |
|----------------|---------|---------|-------------------------|
| WP_001148908.1 | 1.08364 | 0.67535 | <i>EKN05_022235</i>     |
| WP_000242755.1 | 0.9654  | 0.97856 | <i>GA0061070_104725</i> |
| WP_000963792.1 | 1.00139 | 0.99822 | <i>argD</i>             |
| WP_001280641.1 | 1.42287 | 0.23733 | <i>DXE50_21655</i>      |
| WP_000477225.1 | 1.24037 | 0.13957 | <i>ppiA</i>             |
| WP_000049208.1 | 1.55275 | 0.06114 | <i>nirB</i>             |
| WP_000084764.1 | 1.29082 | 0.39558 | <i>nirD</i>             |
| WP_000349855.1 | 1.12398 | 0.53018 | <i>cysG</i>             |
| WP_001276847.1 | 1.23564 | 0.48357 | <i>phoB</i>             |
| WP_001254790.1 | 1.02616 | 0.94652 | <i>KXD89_01675</i>      |
| WP_000165552.1 | 0.90396 | 0.60089 | <i>trpS</i>             |
| WP_001031729.1 | 1.04492 | 0.85704 | <i>gph</i>              |
| WP_000816280.1 | 1.02682 | 0.70108 | <i>rpe</i>              |
| WP_000742143.1 | 0.80532 | 0.28921 | <i>O3K_02135</i>        |
| WP_000343215.1 | 0.92126 | 0.5388  | <i>damX</i>             |
| WP_000439848.1 | 0.93359 | 0.60105 | <i>aroB</i>             |
| WP_000818618.1 | 0.79295 | 0.10003 | <i>aroK</i>             |
| WP_001336003.1 | 0.89181 | 0.40155 | <i>mrcA</i>             |
| WP_000045744.1 | 1.03131 | 0.9012  | <i>nudE</i>             |
| WP_000104533.1 | 0.94842 | 0.75398 | <i>igaA</i>             |
| WP_001295168.1 | 0.88688 | 0.48548 | <i>DXE50_21820</i>      |
| WP_000660483.1 | 0.75215 | 0.16604 | <i>O3K_02070</i>        |
| WP_001135574.1 | 0.95535 | 0.96026 | <i>hslO</i>             |
| WP_001265681.1 | 0.92218 | 0.72458 | <i>pckA</i>             |
| WP_000980727.1 | 1.20771 | 0.18585 | <i>KXD89_01555</i>      |
| WP_001200455.1 | 1.11135 | 0.73457 | <i>feoA</i>             |
| WP_000737039.1 | 1.00266 | 0.997   | <i>feoB</i>             |
| WP_001060070.1 | 0.91055 | 0.63455 | <i>bioH</i>             |
| WP_000619389.1 | 0.88969 | 0.50969 | <i>nfuA</i>             |
| WP_001131758.1 | 0.78856 | 0.17061 | <i>gntT</i>             |
| WP_000815099.1 | 1.05789 | 0.81588 | <i>DXE50_21955</i>      |
| WP_000371928.1 | 0.7822  | 0.23069 | <i>glpE</i>             |
| WP_000448136.1 | 0.78828 | 0.09002 | <i>glpD</i>             |
| WP_000993449.1 | 1.24295 | 0.22903 | <i>DXE50_21995</i>      |
| WP_001197646.1 | 1.34817 | 0.09544 | <i>glgA</i>             |
| WP_000253975.1 | 1.35167 | 0.09253 | <i>glgC</i>             |
| WP_000192523.1 | 1.33964 | 0.21433 | <i>glgX</i>             |
| WP_000799956.1 | 1.06041 | 0.56859 | <i>asd</i>              |
| WP_000210111.1 | 0.86368 | 0.46731 | <i>gntU</i>             |
| WP_000730252.1 | 1.10354 | 0.67933 | <i>A13A_03767</i>       |
| WP_000639811.1 | 1.30925 | 0.25275 | <i>DXE50_22045</i>      |
| WP_000236293.1 | 1.02518 | 0.70797 | <i>DXE50_22050</i>      |
| WP_001295206.1 | 1.35388 | 0.19812 | <i>G711_04008</i>       |
| WP_000595082.1 | 1.45722 | 0.20658 | <i>ggt</i>              |
| WP_000825996.1 | 1.58391 | 0.0503  | <i>EKN05_021790</i>     |
| WP_000073623.1 | 0.97313 | 0.86804 | <i>ugpQ</i>             |
| WP_000907792.1 | 1.66345 | 0.08645 | <i>EL76_0318</i>        |
| WP_000803190.1 | 1.37752 | 0.07338 | <i>A1UI_03729</i>       |

|                |         |         |                         |
|----------------|---------|---------|-------------------------|
| WP_000778768.1 | 1.31378 | 0.12859 | <i>panM</i>             |
| WP_001042003.1 | 0.96195 | 0.81631 | <i>ftsX</i>             |
| WP_000617723.1 | 0.9832  | 0.89451 | <i>ftsE</i>             |
| WP_001040654.1 | 0.88946 | 0.39141 | <i>ftsY</i>             |
| WP_000743193.1 | 1.02243 | 0.93051 | <i>ECMP0215528_3971</i> |
| WP_001311191.1 | 1.58098 | 0.12332 | <i>KXD89_01265</i>      |
| WP_000042895.1 | 0.83379 | 0.37104 | <i>KXD89_01260</i>      |
| WP_000106551.1 | 0.98919 | 0.90157 | <i>zntA</i>             |
| WP_000130621.1 | 0.97513 | 0.87731 | <i>tusA</i>             |
| WP_001245295.1 | 1.34542 | 0.05142 | <i>dcrB</i>             |
| WP_001190062.1 | 0.84818 | 0.3406  | <i>nikR</i>             |
| WP_000149156.1 | 0.95467 | 0.80251 | <i>G711_04052</i>       |
| WP_000361477.1 | 1.22999 | 0.25307 | <i>KXD89_01155</i>      |
| WP_000439170.1 | 1.07128 | 0.77441 | <i>KXD89_01130</i>      |
| WP_000902780.1 | 1.04204 | 0.84536 | <i>DXE50_22455</i>      |
| WP_000323571.1 | 1.1982  | 0.20152 | <i>uspA</i>             |
| WP_000686620.1 | 0.76146 | 0.11631 | <i>rsmJ</i>             |
| WP_001298719.1 | 0.91504 | 0.67531 | <i>HMPREF1595_03282</i> |
| WP_001300574.1 | 0.88909 | 0.49444 | <i>rlmJ</i>             |
| WP_000160816.1 | 0.9435  | 0.87554 | <i>gorA</i>             |
| WP_001296814.1 | 1.0796  | 0.81017 | <i>DXE50_22570</i>      |
| WP_001298717.1 | 1.33107 | 0.11085 | <i>hdeB</i>             |
| WP_000756550.1 | 1.09764 | 0.62258 | <i>hdeA</i>             |
| WP_001081984.1 | 1.4869  | 0.18293 | <i>mdtE</i>             |
| WP_000784827.1 | 1.06903 | 0.83628 | <i>ccp</i>              |
| WP_000934216.1 | 1.29964 | 0.38279 | <i>treF</i>             |
| WP_000357790.1 | 0.90655 | 0.6197  | <i>KXD89_00965</i>      |
| WP_000191237.1 | 1.34949 | 0.31677 | <i>A1UI_03828</i>       |
| WP_000037562.1 | 0.81858 | 0.15268 | <i>WG3_04286</i>        |
| WP_001163141.1 | 0.99616 | 0.97431 | <i>A1UI_03833</i>       |
| WP_000858214.1 | 0.83714 | 0.20214 | <i>dctA</i>             |
| WP_001266293.1 | 0.98381 | 0.9148  | <i>hmsP</i>             |
| WP_000107012.1 | 1.27309 | 0.30583 | <i>A1UI_03843</i>       |
| WP_001196486.1 | 1.1982  | 0.32058 | <i>dppD</i>             |
| WP_000084677.1 | 1.34697 | 0.31986 | <i>dppC</i>             |
| WP_000938855.1 | 1.10226 | 0.68298 | <i>ECMP0215528_4093</i> |
| WP_001222883.1 | 1.2582  | 0.11876 | <i>dppA</i>             |
| WP_001269197.1 | 0.7458  | 0.15404 | <i>HMPREF1620_03849</i> |
| WP_000438957.1 | 1.28784 | 0.39997 | <i>tag</i>              |
| WP_000013950.1 | 1.05959 | 0.81056 | <i>bisC</i>             |
| WP_000747625.1 | 1.05379 | 0.79552 | <i>DXE50_22830</i>      |
| WP_000805038.1 | 0.91905 | 0.70289 | <i>ghrB</i>             |
| WP_000190516.1 | 1.16751 | 0.39813 | <i>DXE50_22840</i>      |
| WP_000014594.1 | 0.93057 | 0.78347 | <i>cspA</i>             |
| WP_001291772.1 | 0.93466 | 0.81249 | <i>glyS</i>             |
| WP_001168560.1 | 0.96849 | 0.96381 | <i>glyQ</i>             |
| WP_000275334.1 | 1.20383 | 0.54079 | <i>xyIB</i>             |
| WP_001149591.1 | 0.79146 | 0.09675 | <i>xyIA</i>             |

|                |         |         |                         |
|----------------|---------|---------|-------------------------|
| WP_000694881.1 | 0.98429 | 0.87449 | <i>DXE50_22900</i>      |
| WP_000494484.1 | 0.76096 | 0.18365 | <i>DXE50_22915</i>      |
| WP_000144363.1 | 0.9578  | 0.72916 | <i>avtA</i>             |
| WP_000514240.1 | 1.14599 | 0.65724 | <i>A1UI_03880</i>       |
| WP_000164036.1 | 0.77289 | 0.13749 | <i>O3K_00925</i>        |
| WP_000183980.1 | 1.27853 | 0.17251 | <i>aldB</i>             |
| WP_000582468.1 | 1.07355 | 0.76751 | <i>selB</i>             |
| WP_000206275.1 | 0.93824 | 0.70753 | <i>selA</i>             |
| WP_000779792.1 | 1.07828 | 0.75319 | <i>DXE50_23010</i>      |
| WP_000072850.1 | 0.91789 | 0.66202 | <i>O3K_00870</i>        |
| WP_000093247.1 | 1.08089 | 0.68597 | <i>O3K_00845</i>        |
| WP_000645439.1 | 1.19184 | 0.21262 | <i>mtlD</i>             |
| WP_000517100.1 | 1.49101 | 0.08929 | <i>DXE50_23040</i>      |
| WP_000665680.1 | 0.96878 | 0.84792 | <i>ECMP0215528_4158</i> |
| WP_000586962.1 | 0.88241 | 0.4656  | <i>lldD</i>             |
| WP_000932347.1 | 1.14459 | 0.56907 | <i>trmL</i>             |
| WP_001277561.1 | 1.04224 | 0.86566 | <i>cysE</i>             |
| WP_001076194.1 | 1.16025 | 0.41834 | <i>gpsA</i>             |
| WP_000003377.1 | 1.05716 | 0.58069 | <i>secB</i>             |
| WP_000024392.1 | 0.89496 | 0.41534 | <i>grxC</i>             |
| WP_001156181.1 | 1.08939 | 0.65339 | <i>DXE50_23100</i>      |
| WP_001350558.1 | 0.89747 | 0.5587  | <i>gpmM</i>             |
| AIN33940.1     | 0.96312 | 0.83513 | -                       |
| WP_000646007.1 | 0.97811 | 0.91828 | <i>tdh</i>              |
| WP_001213834.1 | 1.07911 | 0.50202 | <i>kbl</i>              |
| WP_000842820.1 | 1.00178 | 1       | <i>yibB</i>             |
| WP_000587764.1 | 0.96109 | 0.99921 | <i>rfaD</i>             |
| WP_000699219.1 | 0.81571 | 0.31785 | <i>O3K_00725</i>        |
| WP_001264584.1 | 1.02882 | 0.93949 | <i>rfaC</i>             |
| WP_001395405.1 | 1.083   | 0.80187 | <i>waaL</i>             |
| WP_001236433.1 | 0.79039 | 0.25056 | <i>KXD89_00410</i>      |
| WP_000790279.1 | 0.93428 | 0.72421 | <i>waaZ</i>             |
| WP_000615254.1 | 0.85928 | 0.37966 | <i>rfaY</i>             |
| WP_000376841.1 | 0.95025 | 0.78548 | <i>rfaJ</i>             |
| WP_001188013.1 | 0.95948 | 0.82107 | <i>waaO</i>             |
| WP_000158225.1 | 0.68365 | 0.06584 | <i>rfaS</i>             |
| WP_000229840.1 | 0.93874 | 0.74126 | <i>rfaP</i>             |
| WP_000634283.1 | 1.15362 | 0.64098 | <i>rfaG</i>             |
| WP_000891564.1 | 0.96468 | 0.76658 | <i>A13A_03970</i>       |
| WP_001171866.1 | 0.94226 | 0.7258  | <i>coaD</i>             |
| WP_001114543.1 | 1.02474 | 0.92287 | <i>mutM</i>             |
| pdb 6H58 XX    | 1.03974 | 0.64823 | -                       |
| WP_000050139.1 | 0.94117 | 0.64042 | <i>coaBC</i>            |
| AIN33967.1     | 1.14247 | 0.31657 | -                       |
| WP_000818601.1 | 0.99555 | 0.93667 | <i>slmA</i>             |
| WP_000806177.1 | 0.87678 | 0.44543 | <i>pyrE</i>             |
| WP_000621340.1 | 0.99772 | 0.94863 | <i>yicC</i>             |
| WP_001295237.1 | 1.0699  | 0.72943 | <i>gmk</i>              |

|                |         |         |                         |
|----------------|---------|---------|-------------------------|
| WP_000135058.1 | 0.85399 | 0.31253 | <i>rpoZ</i>             |
| WP_000280488.1 | 1.00951 | 0.97379 | <i>spoT</i>             |
| WP_001070177.1 | 1.03301 | 0.89565 | <i>trmH</i>             |
| WP_000678419.1 | 1.02854 | 0.94023 | <i>recG</i>             |
| WP_000468833.1 | 1.19349 | 0.56042 | <i>gltS</i>             |
| WP_001300954.1 | 1.15594 | 0.54082 | <i>KXD89_00250</i>      |
| WP_000779426.1 | 1.32521 | 0.34762 | <i>O3K_00230</i>        |
| WP_001065718.1 | 1.42127 | 0.23886 | <i>adeD</i>             |
| WP_000879194.1 | 0.92785 | 0.6997  | <i>uhpT</i>             |
| WP_000633668.1 | 1.089   | 0.72131 | <i>uhpA</i>             |
| WP_001181706.1 | 0.98572 | 0.92628 | <i>ilvN</i>             |
| WP_000168475.1 | 0.9053  | 0.46216 | <i>A1UI_03990</i>       |
| WP_000620888.1 | 0.68015 | 0.06232 | <i>EKN05_019820</i>     |
| WP_001336371.1 | 1.05761 | 0.86497 | <i>KXD89_00070</i>      |
| WP_000174305.1 | 1.11733 | 0.72083 | <i>ECMP0215528_4259</i> |
| WP_000985549.1 | 0.86907 | 0.3091  | <i>DXE50_23915</i>      |
| WP_000522208.1 | 1.21669 | 0.4063  | <i>yidB</i>             |
| WP_000072067.1 | 0.95156 | 0.93319 | <i>gyrB</i>             |
| WP_000060112.1 | 0.96089 | 0.82651 | <i>recF</i>             |
| WP_000673464.1 | 0.93826 | 0.62523 | <i>dnaN</i>             |
| WP_000059111.1 | 1.06317 | 0.75669 | <i>dnaA</i>             |
| WP_000831330.1 | 0.97128 | 0.80272 | <i>rpmH</i>             |
| WP_000239730.1 | 1.21397 | 0.41173 | <i>rnpA</i>             |
| WP_000378250.1 | 0.84944 | 0.29114 | <i>yidC</i>             |
| WP_001282346.1 | 1.11341 | 0.56615 | <i>mnmE</i>             |
| WP_001295247.1 | 0.87304 | 0.41161 | <i>tnaA</i>             |
| WP_000131925.1 | 0.96836 | 0.85535 | <i>A1UI_04026</i>       |
| WP_000377786.1 | 0.97832 | 0.89208 | <i>phoU</i>             |
| WP_000063125.1 | 0.9348  | 0.69197 | <i>pstB</i>             |
| WP_000867146.1 | 0.94294 | 0.64974 | <i>pstS</i>             |
| WP_000334099.1 | 1.17091 | 0.25267 | <i>glmS</i>             |
| WP_000933736.1 | 0.89659 | 0.42254 | <i>glmU</i>             |
| WP_001251965.1 | 0.8857  | 0.48526 | <i>atpC</i>             |
| WP_000190506.1 | 0.96223 | 0.99373 | <i>atpD</i>             |
| WP_000896498.1 | 0.92101 | 0.71648 | <i>atpG</i>             |
| WP_001176745.1 | 0.91515 | 0.67611 | <i>atpA</i>             |
| WP_001288587.1 | 0.88103 | 0.45741 | <i>atpH</i>             |
| WP_001052219.1 | 0.96717 | 0.97011 | <i>atpF</i>             |
| WP_000429386.1 | 1.07013 | 0.53329 | <i>atpE</i>             |
| WP_000135625.1 | 0.97677 | 0.83296 | <i>atpB</i>             |
| WP_000932839.1 | 0.92209 | 0.63509 | <i>rsmG</i>             |
| WP_000499788.1 | 0.90139 | 0.4442  | <i>mnmG</i>             |
| WP_000432970.1 | 1.33741 | 0.21697 | <i>asnC</i>             |
| WP_001299914.1 | 1.19735 | 0.44609 | <i>ravA</i>             |
| WP_000102319.1 | 1.0914  | 0.71429 | <i>kup</i>              |
| WP_001301979.1 | 0.93772 | 0.62241 | <i>rbsD</i>             |
| WP_000387770.1 | 0.93046 | 0.58498 | <i>rbsA</i>             |
| WP_000211858.1 | 0.91696 | 0.61246 | <i>rbsC</i>             |

|                |         |         |                    |
|----------------|---------|---------|--------------------|
| WP_001056271.1 | 0.94961 | 0.9192  | <i>rbsB</i>        |
| WP_001300603.1 | 0.90868 | 0.47797 | <i>rbsK</i>        |
| WP_001131164.1 | 0.96594 | 0.83478 | <i>DXE50_24215</i> |
| WP_000379245.1 | 0.88047 | 0.5253  | <i>hdfR</i>        |
| WP_000841001.1 | 0.85498 | 0.31731 | <i>maoP</i>        |
| WP_000208520.1 | 1.01053 | 0.98441 | <i>ilvE</i>        |
| WP_001127399.1 | 1.03617 | 0.88531 | <i>ilvD</i>        |
| WP_000785596.1 | 0.92619 | 0.69341 | <i>ilvA</i>        |
| WP_000024939.1 | 0.96088 | 0.74588 | <i>ilvC</i>        |
| WP_001140251.1 | 0.88481 | 0.37172 | <i>DXE50_24310</i> |
| WP_001238899.1 | 0.9461  | 0.76952 | <i>rep</i>         |
| WP_001295254.1 | 1.03367 | 0.89347 | <i>gppA</i>        |
| WP_000047499.1 | 0.85214 | 0.30371 | <i>rhIB</i>        |
| WP_001280776.1 | 0.91794 | 0.69526 | <i>trxA</i>        |
| WP_001054527.1 | 0.90567 | 0.61216 | <i>rho</i>         |
| WP_001050960.1 | 1.20489 | 0.5388  | <i>wecA</i>        |
| WP_001295256.1 | 0.78556 | 0.08647 | <i>wzzE</i>        |
| WP_001340422.1 | 0.94198 | 0.72453 | <i>wecB</i>        |
| WP_000006621.1 | 1.00232 | 0.97391 | <i>wecC</i>        |
| WP_001226601.1 | 0.80121 | 0.20085 | <i>rffG</i>        |
| WP_000676056.1 | 0.98933 | 0.93598 | <i>rfbA</i>        |
| WP_000612043.1 | 0.94308 | 0.72954 | <i>wecE</i>        |
| WP_000217234.1 | 1.0585  | 0.86274 | <i>rffT</i>        |
| WP_001064040.1 | 0.82746 | 0.27372 | <i>rffM</i>        |
| WP_000774731.1 | 0.92299 | 0.68127 | <i>DXE50_24410</i> |
| WP_000921791.1 | 1.04963 | 0.60932 | <i>hemY</i>        |
| WP_000138997.1 | 1.04073 | 0.85098 | <i>hemX</i>        |
| WP_000026046.1 | 1.23467 | 0.48525 | <i>EL76_4618</i>   |
| WP_001338644.1 | 0.91974 | 0.53129 | <i>hemC</i>        |
| WP_000999947.1 | 1.11311 | 0.5672  | <i>cyaY</i>        |
| WP_000799889.1 | 1.0844  | 0.73489 | <i>DXE50_24485</i> |
| WP_001160654.1 | 0.72335 | 0.06225 | <i>dapF</i>        |
| WP_000812796.1 | 1.03929 | 0.8752  | <i>DXE50_24495</i> |
| WP_000130691.1 | 0.76496 | 0.19201 | <i>xerC</i>        |
| WP_001213584.1 | 0.84488 | 0.32944 | <i>yigB</i>        |
| WP_000383406.1 | 0.98325 | 0.91486 | <i>uvrD</i>        |
| WP_000947159.1 | 0.976   | 0.88134 | <i>corA</i>        |
| WP_001277142.1 | 0.85459 | 0.43701 | <i>DXE50_24560</i> |
| WP_001259700.1 | 0.97066 | 0.79933 | <i>pldA</i>        |
| WP_000487654.1 | 0.84225 | 0.39728 | <i>pldB</i>        |
| WP_000285362.1 | 0.97832 | 0.89208 | <i>yigL</i>        |
| WP_000153907.1 | 0.96952 | 0.95893 | <i>metE</i>        |
| WP_001336442.1 | 1.07591 | 0.70551 | <i>EL76_4589</i>   |
| WP_000045177.1 | 1.21171 | 0.17956 | <i>O3K_24700</i>   |
| WP_000347714.1 | 0.99057 | 0.94072 | <i>rmuC</i>        |
| WP_000227958.1 | 0.97855 | 0.84276 | <i>ubiE</i>        |
| WP_001295259.1 | 0.81431 | 0.31392 | <i>ubiJ</i>        |
| WP_000187530.1 | 1.74178 | 0.0613  | <i>ubiB</i>        |



|                |         |         |                         |
|----------------|---------|---------|-------------------------|
| WP_001295260.1 | 1.14703 | 0.45699 | <i>tatA</i>             |
| WP_000459594.1 | 1.04407 | 0.85976 | <i>tatB</i>             |
| WP_001192396.1 | 1.17325 | 0.60036 | <i>rfaH</i>             |
| WP_000339804.1 | 1.06208 | 0.76118 | <i>ubiD</i>             |
| WP_000209826.1 | 0.83143 | 0.18594 | <i>DXE50_24695</i>      |
| WP_000438725.1 | 1.34502 | 0.09812 | <i>fadA</i>             |
| WP_000965936.1 | 1.33806 | 0.1043  | <i>fadB</i>             |
| WP_000444561.1 | 0.97388 | 0.93822 | <i>pepQ</i>             |
| WP_000853959.1 | 1.17761 | 0.4896  | <i>hemG</i>             |
| WP_001295263.1 | 1.26195 | 0.19719 | <i>DXE50_24765</i>      |
| WP_001065497.1 | 1.10559 | 0.67355 | <i>srkA</i>             |
| WP_000725337.1 | 0.94447 | 0.88245 | <i>dsbA</i>             |
| WP_000250006.1 | 0.92013 | 0.71038 | <i>polA</i>             |
| WP_000183349.1 | 1.04763 | 0.82146 | <i>engB</i>             |
| WP_001295266.1 | 0.93087 | 0.58707 | <i>yihI</i>             |
| WP_000116090.1 | 1.17975 | 0.36569 | <i>hemN</i>             |
| WP_001188777.1 | 0.84124 | 0.31731 | <i>ntrC</i>             |
| WP_000190577.1 | 0.85284 | 0.30705 | <i>DXE50_24825</i>      |
| WP_001271717.1 | 0.76894 | 0.0564  | <i>DXE50_24830</i>      |
| WP_000570668.1 | 0.97764 | 0.92051 | <i>typA</i>             |
| WP_000059678.1 | 0.82726 | 0.27309 | <i>A13A_04267</i>       |
| WP_001295269.1 | 1.25771 | 0.20396 | <i>yihX</i>             |
| WP_000560983.1 | 0.993   | 0.95981 | <i>dtd</i>              |
| WP_001297068.1 | 1.23809 | 0.3655  | <i>WG3_04779</i>        |
| WP_000027703.1 | 1.00344 | 0.98006 | <i>fdhE</i>             |
| WP_000331377.1 | 0.97244 | 0.86488 | <i>fdxH</i>             |
| WP_010723259.1 | 0.97146 | 0.94968 | <i>fdnG</i>             |
| WP_000753617.1 | 0.96541 | 0.84395 | <i>fdhD</i>             |
| WP_000122641.1 | 0.8421  | 0.25849 | <i>sodA</i>             |
| WP_001270260.1 | 0.94483 | 0.73754 | <i>O3K_24310</i>        |
| WP_000580417.1 | 1.04733 | 0.89125 | <i>cpxA</i>             |
| WP_001033722.1 | 1.2504  | 0.1275  | <i>cpxR</i>             |
| WP_001223800.1 | 1.68428 | 0.07895 | <i>cpxP</i>             |
| WP_000591795.1 | 0.97586 | 0.92886 | <i>pfkA</i>             |
| WP_001326656.1 | 0.84512 | 0.33023 | <i>cdh</i>              |
| WP_001216325.1 | 1.12072 | 0.37331 | <i>tpiA</i>             |
| WP_000802216.1 | 0.92057 | 0.67212 | <i>KXD89_21165</i>      |
| WP_000655989.1 | 1.21711 | 0.40547 | <i>EL76_4498</i>        |
| WP_000323556.1 | 1.14243 | 0.47103 | <i>ECMP0215528_4537</i> |
| WP_000796332.1 | 1.08063 | 0.74616 | <i>EL76_4496</i>        |
| WP_001250644.1 | 1.09513 | 0.63186 | <i>glpX</i>             |
| WP_000136788.1 | 0.96104 | 0.99946 | <i>glpK</i>             |
| WP_000084268.1 | 1.06594 | 0.7908  | <i>glpF</i>             |
| WP_001296623.1 | 1.10785 | 0.41024 | <i>zapB</i>             |
| WP_000872908.1 | 1.18725 | 0.34681 | <i>rraA</i>             |
| WP_000139496.1 | 0.79352 | 0.1821  | <i>menA</i>             |
| WP_001293341.1 | 0.99644 | 0.83362 | <i>hslU</i>             |
| WP_000208242.1 | 0.94161 | 0.86197 | <i>hslV</i>             |

|                |         |         |              |
|----------------|---------|---------|--------------|
| WP_000068828.1 | 0.93849 | 0.62641 | <i>ftsN</i>  |
| WP_000644904.1 | 1.04259 | 0.86454 | <i>cytR</i>  |
| WP_000710769.1 | 0.85827 | 0.33349 | <i>rpmE</i>  |
| WP_000852812.1 | 0.84708 | 0.23247 | <i>metJ</i>  |
| WP_001295694.1 | 0.97075 | 0.85702 | A1UI_04255   |
| WP_000110772.1 | 0.91584 | 0.51223 | <i>metL</i>  |
| WP_001295695.1 | 1.25087 | 0.12696 | <i>katG</i>  |
| WP_000374004.1 | 1.13642 | 0.48978 | <i>gldA</i>  |
| WP_000424840.1 | 0.94486 | 0.73769 | <i>fsa</i>   |
| WP_001174077.1 | 0.9909  | 0.94198 | <i>ptsP</i>  |
| WP_000556306.1 | 1.00127 | 0.96817 | KXD89_20995  |
| WP_001005586.1 | 0.98823 | 0.87116 | <i>ppc</i>   |
| WP_001298964.1 | 0.96363 | 0.76084 | <i>argE</i>  |
| WP_000935370.1 | 1.07998 | 0.80925 | <i>argC</i>  |
| WP_001302318.1 | 1.26599 | 0.31724 | <i>argB</i>  |
| WP_001230087.1 | 1.21473 | 0.28391 | <i>argH</i>  |
| WP_001025939.1 | 1.01603 | 0.95967 | <i>oxyR</i>  |
| WP_001120810.1 | 0.90856 | 0.63145 | <i>sthA</i>  |
| WP_000187022.1 | 0.82445 | 0.16732 | <i>trmA</i>  |
| WP_000201820.1 | 0.9481  | 0.75251 | <i>murl</i>  |
| WP_001016699.1 | 1.04247 | 0.86491 | <i>murB</i>  |
| WP_000654630.1 | 0.89824 | 0.53221 | <i>birA</i>  |
| WP_000023081.1 | 0.98391 | 0.87239 | <i>coaA</i>  |
| WP_001275702.1 | 0.96292 | 0.82079 | <i>secE</i>  |
| WP_001287516.1 | 0.88433 | 0.47706 | <i>nusG</i>  |
| WP_001085926.1 | 0.87086 | 0.39951 | <i>rplK</i>  |
| WP_001096684.1 | 0.92014 | 0.71044 | <i>rplA</i>  |
| WP_001207201.1 | 0.89316 | 0.53131 | <i>rplJ</i>  |
| WP_000028878.1 | 0.87236 | 0.40784 | <i>rplL</i>  |
| WP_000263098.1 | 0.9396  | 0.84766 | <i>rpoB</i>  |
| WP_000653944.1 | 0.9235  | 0.73383 | <i>rpoC</i>  |
| WP_000934302.1 | 0.85382 | 0.3602  | <i>rsd</i>   |
| WP_000373940.1 | 1.19193 | 0.45774 | <i>nudC</i>  |
| WP_000137657.1 | 0.95953 | 0.73854 | <i>hemE</i>  |
| WP_000362388.1 | 1.27143 | 0.42491 | <i>nfi</i>   |
| WP_001044513.1 | 1.02907 | 0.69173 | <i>hupA</i>  |
| WP_000866800.1 | 0.97177 | 0.86178 | <i>purD</i>  |
| WP_001187559.1 | 0.93359 | 0.60104 | <i>purH</i>  |
| WP_000138905.1 | 1.23893 | 0.14138 | <i>aceB</i>  |
| WP_000857856.1 | 1.21685 | 0.17175 | <i>aceA</i>  |
| WP_001137220.1 | 1.75684 | 0.05735 | <i>aceK</i>  |
| WP_000632913.1 | 0.9388  | 0.74149 | <i>espL4</i> |
| WP_000096011.1 | 0.86761 | 0.3036  | <i>meth</i>  |
| WP_000956830.1 | 1.53326 | 0.15087 | DXE50_25790  |
| WP_000421763.1 | 1.31647 | 0.12569 | <i>pepE</i>  |
| WP_000936377.1 | 1.12497 | 0.7035  | A1UI_04335   |
| WP_001207634.1 | 0.81575 | 0.31796 | A1UI_04336   |
| WP_001290310.1 | 0.78624 | 0.1654  | A1UI_04337   |

|                |         |         |                         |
|----------------|---------|---------|-------------------------|
| WP_000789986.1 | 0.98235 | 0.89847 | <i>pgi</i>              |
| WP_001326644.1 | 0.94505 | 0.76547 | <i>ubiC</i>             |
| WP_000455227.1 | 0.96002 | 0.82318 | <i>ubiA</i>             |
| WP_000017354.1 | 0.9455  | 0.8898  | <i>plsB</i>             |
| WP_000646078.1 | 0.90332 | 0.45301 | <i>lexA</i>             |
| WP_001030593.1 | 1.18209 | 0.35971 | <i>DXE50_25970</i>      |
| WP_001295691.1 | 0.89907 | 0.59217 | <i>zur</i>              |
| WP_001298868.1 | 1.01929 | 0.94508 | <i>dusA</i>             |
| WP_000235508.1 | 1.24244 | 0.137   | <i>KXD89_20510</i>      |
| WP_000918363.1 | 0.90162 | 0.54644 | <i>DXE50_26005</i>      |
| WP_001147328.1 | 0.96129 | 0.81327 | <i>alr</i>              |
| WP_000486985.1 | 0.8222  | 0.16159 | <i>tyrB</i>             |
| WP_001226928.1 | 0.89197 | 0.40222 | <i>DXE50_26025</i>      |
| WP_000270375.1 | 1.53183 | 0.15177 | <i>DXE50_26030</i>      |
| WP_000155657.1 | 1.06859 | 0.73471 | <i>DXE50_26035</i>      |
| WP_000357740.1 | 1.08656 | 0.66415 | <i>uvrA</i>             |
| WP_000168305.1 | 0.93996 | 0.85024 | <i>DXE50_26045</i>      |
| WP_000106882.1 | 0.91278 | 0.64289 | <i>DXE50_26070</i>      |
| WP_000402210.1 | 0.78851 | 0.24592 | <i>KY274_20395</i>      |
| WP_000832573.1 | 1.30142 | 0.26353 | <i>actP</i>             |
| WP_000078239.1 | 1.31105 | 0.07216 | <i>acs</i>              |
| WP_000719886.1 | 0.87946 | 0.52174 | <i>DXE50_26140</i>      |
| WP_001046187.1 | 0.87273 | 0.42977 | <i>alsB</i>             |
| WP_000083216.1 | 0.88225 | 0.36111 | <i>rpiR</i>             |
| WP_000716794.1 | 0.99788 | 0.98217 | <i>rpiB</i>             |
| WP_000971886.1 | 0.97679 | 0.88784 | <i>phnN</i>             |
| WP_001300891.1 | 1.10621 | 0.59152 | <i>DXE50_26305</i>      |
| WP_000697926.1 | 1.10811 | 0.74209 | <i>basR</i>             |
| WP_000986601.1 | 1.19155 | 0.56417 | <i>A1UI_04504</i>       |
| WP_000611288.1 | 0.93337 | 0.72071 | <i>dcuR</i>             |
| WP_001295383.1 | 1.0355  | 0.8736  | <i>DXE50_26450</i>      |
| WP_001188520.1 | 1.26996 | 0.18492 | <i>DXE50_26655</i>      |
| WP_000068922.1 | 1.34184 | 0.32623 | <i>dsbD</i>             |
| WP_000883400.1 | 0.82981 | 0.359   | <i>cutA</i>             |
| WP_000961959.1 | 0.809   | 0.22104 | <i>DXE50_26670</i>      |
| WP_000069437.1 | 1.11226 | 0.39729 | <i>aspA</i>             |
| WP_001267448.1 | 1.12092 | 0.71265 | <i>ECMP0215528_4825</i> |
| WP_001026276.1 | 0.88378 | 0.47372 | <i>groES</i>            |
| WP_000729117.1 | 0.89587 | 0.54847 | <i>groL</i>             |
| WP_000558209.1 | 1.17186 | 0.38638 | <i>DXE50_26700</i>      |
| WP_000940549.1 | 0.85358 | 0.35933 | <i>epmB</i>             |
| WP_000257278.1 | 0.77503 | 0.06571 | <i>efp</i>              |
| WP_000239596.1 | 1.16026 | 0.41832 | <i>ecnB</i>             |
| WP_001238378.1 | 1.34048 | 0.21335 | <i>O3K_22885</i>        |
| WP_001336292.1 | 1.03272 | 0.8966  | <i>KXD89_19985</i>      |
| WP_000208757.1 | 1.06028 | 0.85821 | <i>frdC</i>             |
| WP_000829498.1 | 1.13406 | 0.59616 | <i>DXE50_26755</i>      |
| WP_001192973.1 | 1.21488 | 0.28358 | <i>frdA</i>             |

|                |         |         |                         |
|----------------|---------|---------|-------------------------|
| WP_000004771.1 | 0.91149 | 0.58866 | <i>epmA</i>             |
| WP_001236847.1 | 1.05718 | 0.81811 | <i>ECMP0215528_4846</i> |
| WP_000934920.1 | 1.02532 | 0.91827 | <i>psd</i>              |
| WP_000041964.1 | 0.99428 | 0.92963 | <i>rsgA</i>             |
| WP_001295188.1 | 1.00127 | 0.96815 | <i>orn</i>              |
| WP_001295189.1 | 1.16889 | 0.50979 | <i>nnrD</i>             |
| WP_000981977.1 | 0.8986  | 0.53373 | <i>tsaE</i>             |
| WP_001280345.1 | 1.14091 | 0.57844 | <i>miaA</i>             |
| WP_001051883.1 | 1.08883 | 0.46955 | <i>hfq</i>              |
| WP_000460362.1 | 1.02138 | 0.93575 | <i>hflX</i>             |
| WP_000312488.1 | 0.9286  | 0.7696  | <i>hflK</i>             |
| WP_001232412.1 | 1.02873 | 0.69312 | <i>hflC</i>             |
| WP_000527955.1 | 1.03679 | 0.66011 | <i>purA</i>             |
| WP_001177639.1 | 0.87691 | 0.5128  | <i>nsrR</i>             |
| WP_000076332.1 | 1.16589 | 0.40259 | <i>rnr</i>              |
| WP_001293282.1 | 0.94848 | 0.75425 | <i>rlmB</i>             |
| WP_000569707.1 | 1.23755 | 0.4803  | <i>yjfP</i>             |
| WP_000133631.1 | 1.11498 | 0.72621 | <i>ulaR</i>             |
| WP_001216676.1 | 0.8051  | 0.12987 | <i>rpsF</i>             |
| WP_001315977.1 | 1.12181 | 0.71064 | <i>priB</i>             |
| pdb 7OI0 R     | 1.11373 | 0.39307 | -                       |
| WP_001196062.1 | 0.99246 | 0.85177 | <i>rplI</i>             |
| WP_001119478.1 | 1.16893 | 0.50969 | <i>ytfB</i>             |
| WP_000211225.1 | 0.8875  | 0.49622 | <i>DXE50_27040</i>      |
| WP_000331456.1 | 0.72817 | 0.06779 | <i>ytfE</i>             |
| WP_000560561.1 | 1.00078 | 0.99546 | <i>A13A_04864</i>       |
| WP_000589431.1 | 1.0111  | 0.76833 | <i>cpdB</i>             |
| WP_000886919.1 | 1.05202 | 0.80295 | <i>cysQ</i>             |
| WP_000175279.1 | 1.01885 | 0.94706 | <i>KXD89_19650</i>      |
| WP_000935036.1 | 0.86156 | 0.46018 | <i>WG3_00121</i>        |
| WP_001295196.1 | 1.21032 | 0.29335 | <i>msrA</i>             |
| WP_001269327.1 | 1.17298 | 0.50024 | <i>tamA</i>             |
| WP_000060911.1 | 1.2019  | 0.31206 | <i>tamB</i>             |
| WP_001219160.1 | 1.03037 | 0.90429 | <i>DXE50_27115</i>      |
| WP_000055075.1 | 0.77357 | 0.06338 | <i>ppa</i>              |
| WP_000265913.1 | 1.40195 | 0.05863 | <i>ytfQ</i>             |
| WP_001219813.1 | 0.8735  | 0.32606 | <i>mpl</i>              |
| WP_000166270.1 | 1.32256 | 0.23526 | <i>yjgA</i>             |
| WP_001162171.1 | 0.99867 | 0.82356 | <i>pmbA</i>             |
| WP_000187778.1 | 1.08167 | 0.74304 | <i>nrdD</i>             |
| WP_000047539.1 | 0.813   | 0.15244 | <i>DXE50_27225</i>      |
| WP_000230281.1 | 0.83127 | 0.3634  | <i>ECMP0215528_4971</i> |
| WP_000256658.1 | 0.79873 | 0.27177 | <i>KXD89_19490</i>      |
| WP_000036434.1 | 0.95965 | 0.82173 | <i>KY274_19440</i>      |
| WP_000002953.1 | 1.04861 | 0.81733 | <i>rraB</i>             |
| WP_001059402.1 | 0.91775 | 0.61596 | <i>A311_00387</i>       |
| WP_000416392.1 | 0.85985 | 0.34141 | <i>valS</i>             |
| WP_000786400.1 | 0.92355 | 0.68339 | <i>holC</i>             |

|                |         |         |                         |
|----------------|---------|---------|-------------------------|
| WP_000397144.1 | 0.93057 | 0.7835  | <i>pepA</i>             |
| WP_000584114.1 | 0.94931 | 0.75809 | <i>lptF</i>             |
| WP_001295681.1 | 0.96392 | 0.82543 | <i>lptG</i>             |
| WP_001294573.1 | 1.31522 | 0.12702 | <i>HMPREF1599_05895</i> |
| WP_000998695.1 | 1.07846 | 0.81296 | <i>O3K_22310</i>        |
| WP_000175457.1 | 0.90998 | 0.58215 | <i>DXE50_19750</i>      |
| WP_000373366.1 | 0.98522 | 0.92398 | <i>A13A_04969</i>       |
| WP_000695564.1 | 1.57182 | 0.12821 | <i>HMPREF1589_00471</i> |
| WP_000438562.1 | 0.9742  | 0.81881 | <i>uxuA</i>             |
| WP_000208205.1 | 0.94874 | 0.68047 | <i>HMPREF1589_00461</i> |
| WP_000833679.1 | 0.85451 | 0.36263 | <i>A1UI_04679</i>       |
| WP_000568432.1 | 0.97406 | 0.81802 | <i>iadA</i>             |
| WP_001300012.1 | 0.78565 | 0.23895 | <i>HMPREF1589_00446</i> |
| WP_000443951.1 | 0.68574 | 0.068   | <i>mcrB</i>             |
| WP_001272447.1 | 0.78879 | 0.17112 | <i>HMPREF1589_00433</i> |
| WP_001063204.1 | 0.7933  | 0.1008  | <i>HMPREF1589_00432</i> |
| WP_000217931.1 | 0.93468 | 0.69142 | <i>HMPREF1589_00430</i> |
| WP_001312515.1 | 0.83956 | 0.20929 | <i>O3K_21780</i>        |
| WP_001299714.1 | 1.10656 | 0.59025 | <i>G925_04708</i>       |
| WP_001308243.1 | 0.90539 | 0.61541 | <i>DXE50_27710</i>      |
| WP_000799911.1 | 1.19885 | 0.55019 | <i>dnaC</i>             |
| WP_000098818.1 | 0.92599 | 0.6524  | <i>dnaT</i>             |
| WP_001272330.1 | 1.06131 | 0.76434 | <i>rsmC</i>             |
| WP_000204012.1 | 1.08804 | 0.78965 | <i>G925_04726</i>       |
| WP_001092461.1 | 1.03978 | 0.91079 | <i>rimI</i>             |
| WP_000175940.1 | 0.9036  | 0.59852 | <i>prfC</i>             |
| WP_001295748.1 | 0.99616 | 0.8349  | <i>osmY</i>             |
| WP_001143230.1 | 1.39714 | 0.15523 | -                       |
| WP_001298497.1 | 1.05928 | 0.77269 | <i>deoC</i>             |
| WP_000477807.1 | 1.08353 | 0.67577 | <i>deoA</i>             |
| WP_000816471.1 | 1.11983 | 0.37577 | <i>deoB</i>             |
| WP_000224877.1 | 1.05546 | 0.58708 | <i>deoD</i>             |
| WP_000105884.1 | 0.95279 | 0.77406 | <i>lplA</i>             |
| WP_001132955.1 | 0.94751 | 0.74982 | <i>DXE50_28030</i>      |
| WP_001029687.1 | 0.94496 | 0.66038 | <i>radA</i>             |
| WP_000093814.1 | 0.92832 | 0.6628  | <i>nadR</i>             |
| WP_000046749.1 | 1.00318 | 0.80331 | <i>ettA</i>             |
| WP_000409451.1 | 1.28192 | 0.29208 | <i>slt</i>              |
| WP_000068679.1 | 1.08961 | 0.71953 | <i>trpR</i>             |
| WP_000942344.1 | 0.81034 | 0.22464 | <i>gpmB</i>             |
| WP_000371666.1 | 1.26923 | 0.18601 | <i>robA</i>             |
| WP_000875487.1 | 1.02185 | 0.93369 | <i>creA</i>             |
| WP_001194358.1 | 1.17348 | 0.24746 | <i>arcA</i>             |
| WP_001223132.1 | 1.0654  | 0.79249 | <i>trmJ</i>             |
| QBM92672.2     | 0.97589 | 0.88437 | -                       |
| WP_000737282.1 | 0.81067 | 0.30378 | -                       |
| WP_000875061.1 | 1.11914 | 0.71669 | -                       |
| WP_001306825.1 | 1.16561 | 0.61595 | <i>ycgN</i>             |

|                |         |         |            |
|----------------|---------|---------|------------|
| WP_001350503.1 | 0.79271 | 0.09857 | -          |
| WP_001307844.1 | 1.02113 | 0.93485 | <i>rnd</i> |
| QWY90515.1     | 0.71325 | 0.10146 | -          |
| QWY90557.1     | 0.96193 | 0.83051 | -          |

---

The up-regulated proteins are highlighted in orange, while blue for down-regulated proteins. Target genes for analysis are in red.
