# Supplementary material for: A new variant of the colistin resistance gene MCR-1 with co-resistance to β-lactam antibiotics reveals a potential novel antimicrobial peptide
Source: PubMed Central journal article supplement (PMC10786390; doi:10.1371/journal.pbio.3002433), 2023-12-13
Supplement: pbio.3002433.s026.pdf [file pbio.3002433.s026.pdf]

**Table S5. The significantly enriched GO terms of differentially expressed proteins between *E. coli* BW25113 carrying WT MCR-1 and M6.**

| GO_ID      | Term                                      | Test | Ref | TestAll | RefAll | Test_per    | Ref_per     | P value     | FDR         | Rich Factor |
|------------|-------------------------------------------|------|-----|---------|--------|-------------|-------------|-------------|-------------|-------------|
| GO:0030313 | cell envelope                             | 17   | 172 | 97      | 2350   | 0.175257732 | 0.073191489 | 0.0004768   | 0.16655752  | 0.098837209 |
| GO:0031975 | envelope                                  | 17   | 175 | 97      | 2350   | 0.175257732 | 0.074468085 | 0.000585571 | 0.16655752  | 0.097142857 |
| GO:0030288 | outer membrane-bounded periplasmic space  | 11   | 103 | 97      | 2350   | 0.113402062 | 0.043829787 | 0.00282408  | 0.344537731 | 0.106796117 |
| GO:0042597 | periplasmic space                         | 12   | 127 | 97      | 2350   | 0.12371134  | 0.054042553 | 0.005088546 | 0.349201477 | 0.094488189 |
| GO:0071944 | cell periphery                            | 32   | 559 | 97      | 2350   | 0.329896907 | 0.23787234  | 0.02272628  | 0.387364975 | 0.057245081 |
| GO:0019867 | outer membrane                            | 7    | 70  | 97      | 2350   | 0.072164948 | 0.029787234 | 0.023382679 | 0.387364975 | 0.1         |
| GO:0009279 | cell outer membrane                       | 6    | 63  | 97      | 2350   | 0.06185567  | 0.026808511 | 0.04304829  | 0.397201869 | 0.095238095 |
| GO:0044462 | external encapsulating structure part     | 6    | 63  | 97      | 2350   | 0.06185567  | 0.026808511 | 0.04304829  | 0.397201869 | 0.095238095 |
| GO:0009338 | exodeoxyribonuclease V complex            | 1    | 2   | 97      | 2350   | 0.010309278 | 0.000851064 | 0.080866281 | 0.446419352 | 0.5         |
| GO:0009289 | pilus                                     | 1    | 2   | 97      | 2350   | 0.010309278 | 0.000851064 | 0.080866281 | 0.446419352 | 0.5         |
| GO:0030312 | external encapsulating structure          | 6    | 75  | 97      | 2350   | 0.06185567  | 0.031914894 | 0.086215692 | 0.459912075 | 0.08        |
| GO:0005886 | plasma membrane                           | 26   | 502 | 97      | 2350   | 0.268041237 | 0.213617021 | 0.114912024 | 0.499936259 | 0.051792829 |
| GO:0016021 | integral component of membrane            | 24   | 472 | 97      | 2350   | 0.24742268  | 0.200851064 | 0.149410422 | 0.53946267  | 0.050847458 |
| GO:0031224 | intrinsic component of membrane           | 24   | 487 | 97      | 2350   | 0.24742268  | 0.207234043 | 0.190702895 | 0.572108684 | 0.049281314 |
| GO:0016020 | membrane                                  | 33   | 696 | 97      | 2350   | 0.340206186 | 0.296170213 | 0.194793149 | 0.581203473 | 0.047413793 |
| GO:0044425 | membrane part                             | 25   | 524 | 97      | 2350   | 0.257731959 | 0.222978723 | 0.234081901 | 0.630392568 | 0.047709924 |
| GO:0046930 | pore complex                              | 1    | 7   | 97      | 2350   | 0.010309278 | 0.002978723 | 0.255806449 | 0.642735654 | 0.142857143 |
| GO:0045203 | integral component of cell outer membrane | 1    | 8   | 97      | 2350   | 0.010309278 | 0.003404255 | 0.286615998 | 0.673885152 | 0.125       |
| GO:0042995 | cell projection                           | 1    | 8   | 97      | 2350   | 0.010309278 | 0.003404255 | 0.286615998 | 0.673885152 | 0.125       |
| GO:0043231 | intracellular membrane-bounded organelle  | 1    | 10  | 97      | 2350   | 0.010309278 | 0.004255319 | 0.344497641 | 0.703082545 | 0.1         |
