# Supplementary material for: A new variant of the colistin resistance gene MCR-1 with co-resistance to β-lactam antibiotics reveals a potential novel antimicrobial peptide
Source: PubMed Central journal article supplement (PMC10786390; doi:10.1371/journal.pbio.3002433), 2023-12-13
Supplement: pbio.3002433.s027.pdf [file pbio.3002433.s027.pdf]

Table S6. The KEGG pathways map of differentially expressed proteins between *E. coli* BW25113 carrying WT MCR-1 and M6.

| Map_ID  | Pathways                                 | Test | TestAll | Ref | RefAll | Test_per | Ref_per  | P value     | FDR         | Rich Factor |
|---------|------------------------------------------|------|---------|-----|--------|----------|----------|-------------|-------------|-------------|
| ko02026 | Biofilm formation - Escherichia coli     | 3    | 97      | 28  | 2350   | 0.030928 | 0.011915 | 0.106128204 | 0.742897429 | 0.107142857 |
| ko04216 | Ferroptosis                              | 1    | 97      | 2   | 2350   | 0.010309 | 0.000851 | 0.080866281 | 0.742897429 | 0.5         |
| ko00040 | Pentose and glucuronate interconversions | 2    | 97      | 19  | 2350   | 0.020619 | 0.008085 | 0.183464562 | 0.791519469 | 0.105263158 |
| ko00550 | Peptidoglycan biosynthesis               | 2    | 97      | 21  | 2350   | 0.020619 | 0.008936 | 0.214007878 | 0.791519469 | 0.095238095 |
| ko00330 | Arginine and proline metabolism          | 2    | 97      | 22  | 2350   | 0.020619 | 0.009362 | 0.229463379 | 0.791519469 | 0.090909091 |
| ko00790 | Folate biosynthesis                      | 2    | 97      | 23  | 2350   | 0.020619 | 0.009787 | 0.244994121 | 0.791519469 | 0.086956522 |
| ko00633 | Nitrotoluene degradation                 | 1    | 97      | 6   | 2350   | 0.010309 | 0.002553 | 0.223680603 | 0.791519469 | 0.166666667 |
| ko00051 | Fructose and mannose metabolism          | 2    | 97      | 27  | 2350   | 0.020619 | 0.011489 | 0.307262512 | 0.807041971 | 0.074074074 |
| ko00670 | One carbon pool by folate                | 1    | 97      | 11  | 2350   | 0.010309 | 0.004681 | 0.371670174 | 0.807041971 | 0.090909091 |
| ko00410 | beta-Alanine metabolism                  | 1    | 97      | 11  | 2350   | 0.010309 | 0.004681 | 0.371670174 | 0.807041971 | 0.090909091 |
| ko00220 | Arginine biosynthesis                    | 1    | 97      | 12  | 2350   | 0.010309 | 0.005106 | 0.397727461 | 0.807041971 | 0.083333333 |
| ko03010 | Ribosome                                 | 1    | 97      | 56  | 2350   | 0.010309 | 0.02383  | 0.908299313 | 0.908299313 | 0.017857143 |
| ko00270 | Cysteine and methionine metabolism       | 1    | 97      | 34  | 2350   | 0.010309 | 0.014468 | 0.763916442 | 0.843534434 | 0.029411765 |
| ko00630 | Glyoxylate and dicarboxylate metabolism  | 1    | 97      | 29  | 2350   | 0.010309 | 0.01234  | 0.707686248 | 0.825633956 | 0.034482759 |
| ko00052 | Galactose metabolism                     | 1    | 97      | 22  | 2350   | 0.010309 | 0.009362 | 0.606083889 | 0.807041971 | 0.045454545 |
| ko00920 | Sulfur metabolism                        | 1    | 97      | 18  | 2350   | 0.010309 | 0.00766  | 0.533065071 | 0.807041971 | 0.055555556 |
| ko00561 | Glycerolipid metabolism                  | 1    | 97      | 14  | 2350   | 0.010309 | 0.005957 | 0.446675733 | 0.807041971 | 0.071428571 |
| ko00450 | Selenocompound metabolism                | 1    | 97      | 13  | 2350   | 0.010309 | 0.005532 | 0.422714816 | 0.807041971 | 0.076923077 |
| ko00260 | Glycine, serine and threonine metabolism | 2    | 97      | 35  | 2350   | 0.020619 | 0.014894 | 0.427731824 | 0.807041971 | 0.057142857 |
| ko00511 | Other glycan degradation                 | 1    | 97      | 2   | 2350   | 0.010309 | 0.000851 | 0.080866281 | 0.742897429 | 0.5         |
| ko00910 | Nitrogen metabolism                      | 2    | 97      | 16  | 2350   | 0.020619 | 0.006809 | 0.139178119 | 0.751493081 | 0.125       |

The up-regulated pathways are highlighted in red, while blue for down-regulated pathways.
