# Supplementary material for: A new variant of the colistin resistance gene MCR-1 with co-resistance to β-lactam antibiotics reveals a potential novel antimicrobial peptide
Source: PubMed Central journal article supplement (PMC10786390; doi:10.1371/journal.pbio.3002433), 2023-12-13
Supplement: pbio.3002433.s028.pdf [file pbio.3002433.s028.pdf]

**Table S7. Bacterial strains used in this study**

| Bacterial strains                                    | Description                                                                                                                                                         | Reference/source |
|------------------------------------------------------|---------------------------------------------------------------------------------------------------------------------------------------------------------------------|------------------|
| <i>E.coli</i> DH5 $\alpha$                           | Type strain (F-, $\phi$ 80d lacZ $\Delta$ M15, $\Delta$ (lacZYA argF) U169, deoR, recA1, endA1, hsdR17 (rK-, mK+), phoA, supE44, $\lambda$ -, thi-1, gyrA96, relA1) | Our lab          |
| <i>E.coli</i> BW25113                                | Type strain (F- DE(araD-araB)567 lacZ4787(del)::rrnB-3 LAM-rph-1 DE(rhaD-rhaB)568 hsdR514)                                                                          | Our lab          |
| <i>E.coli</i> ATCC25922                              | Type strain                                                                                                                                                         | Our lab          |
| <i>P. aeruginosa</i> ATCC27853                       | Type strain                                                                                                                                                         | Our lab          |
| <i>S. Typhimurium</i> SL1344                         | Type strain                                                                                                                                                         | Our lab          |
| <i>K. pneumoniae</i> ATCC13883                       | Type strain                                                                                                                                                         | Our lab          |
| <i>A. baumannii</i> ATCC19606                        | Type strain                                                                                                                                                         | Our lab          |
| <i>S. aureus</i> ATCC25913                           | Type strain                                                                                                                                                         | Our lab          |
| <i>A. baumannii</i> clinical isolate 1               | Clinical isolate                                                                                                                                                    | Our lab          |
| <i>A. baumannii</i> clinical isolate 2               | Clinical isolate                                                                                                                                                    | Our lab          |
| <i>E. coli</i> CRE clinical isolate 1                | Clinical isolate                                                                                                                                                    | Our lab          |
| <i>K. pneumoniae</i> CRKP clinical isolate 1         | Clinical isolate                                                                                                                                                    | Our lab          |
| <i>S. aureus</i> MRSA clinical isolate 1             | Clinical isolate                                                                                                                                                    | Our lab          |
| <i>S. aureus</i> MRSA clinical isolate 2             | Clinical isolate                                                                                                                                                    | Our lab          |
| <i>E. coli mcr-1</i> <sup>+</sup> clinical isolate 1 | Clinical isolate                                                                                                                                                    | Our lab          |
| <i>E. coli mcr-1</i> <sup>+</sup> clinical isolate 2 | Clinical isolate                                                                                                                                                    | Our lab          |
| <i>E.coli</i> BW25113 $\Delta$ <i>mrcB</i>           | <i>E. coli</i> BW25113 derivative with the deletion of <i>mrcB</i>                                                                                                  | This study       |
| <i>E.coli</i> BW25113 $\Delta$ <i>ycbB</i>           | <i>E. coli</i> BW25113 derivative with the deletion of <i>ycbB</i>                                                                                                  | This study       |
| <i>E.coli</i> BW25113 $\Delta$ <i>ycfM</i>           | <i>E. coli</i> BW25113 derivative with the deletion of <i>ycfM</i>                                                                                                  | This study       |
