# Supplementary material for: A new variant of the colistin resistance gene MCR-1 with co-resistance to β-lactam antibiotics reveals a potential novel antimicrobial peptide
Source: PubMed Central journal article supplement (PMC10786390; doi:10.1371/journal.pbio.3002433), 2023-12-13
Supplement: pbio.3002433.s029.pdf [file pbio.3002433.s029.pdf]

Table S8. Plasmids used in this study

| Plasmids                                     | Description                                                                                                                                     | Reference/source |
|----------------------------------------------|-------------------------------------------------------------------------------------------------------------------------------------------------|------------------|
| pACYCDuet-1                                  | Vector carrying the P15A replicon, <i>lacI</i> gene and chloramphenicol resistance gene                                                         | Addgene #71147   |
| pBAD24                                       | A tightly controlled expression vectors regulated by the arabinose operon, carrying pBR322 replicon and ampicillin gene.                        | Our lab          |
| pACYC-Para- <i>mcr-1</i>                     | pACYCDuet-1 derivative replacing T7 promoter with arabinose promoter and carrying wide type <i>mcr-1</i> gene.                                  | Our lab          |
| pACYC-Para-M6                                | pACYCDuet-1 derivative replacing T7 promoter with arabinose promoter and carrying <i>mcr-1</i> gene with mutations P188A+P195S.                 | This study       |
| pACYC-Para- <i>mcr-1</i> P188A               | pACYCDuet-1 derivative replacing T7 promoter with arabinose promoter and carrying <i>mcr-1</i> gene with mutation P188A.                        | This study       |
| pACYC-Para- <i>mcr-1</i> P195S               | pACYCDuet-1 derivative replacing T7 promoter with arabinose promoter and carrying <i>mcr-1</i> gene with mutation P195S.                        | This study       |
| pACYC-NP- <i>mcr-1</i>                       | pACYCDuet-1 derivative replacing T7 promoter with native promoter of <i>mcr-1</i> and carrying wide type <i>mcr-1</i> gene.                     | Our lab          |
| pACYC-NP-M6                                  | pACYCDuet-1 derivative replacing T7 promoter with native promoter of <i>mcr-1</i> and carrying <i>mcr-1</i> gene with mutations P188A+P195S.    | This study       |
| pACYC-Para- <i>mcr-1</i> K187A               | pACYCDuet-1 derivative replacing T7 promoter with arabinose promoter and carrying <i>mcr-1</i> gene with mutation K187A.                        | This study       |
| pACYC-Para- <i>mcr-1</i> L189A               | pACYCDuet-1 derivative replacing T7 promoter with arabinose promoter and carrying <i>mcr-1</i> gene with mutation L189A.                        | This study       |
| pACYC-Para- <i>mcr-1</i> R190A               | pACYCDuet-1 derivative replacing T7 promoter with arabinose promoter and carrying <i>mcr-1</i> gene with mutation R190A.                        | This study       |
| pACYC-Para- <i>mcr-1</i> S191A               | pACYCDuet-1 derivative replacing T7 promoter with arabinose promoter and carrying <i>mcr-1</i> gene with mutation S191A.                        | This study       |
| pACYC-Para- <i>mcr-1</i> Y192A               | pACYCDuet-1 derivative replacing T7 promoter with arabinose promoter and carrying <i>mcr-1</i> gene with mutation Y192A.                        | This study       |
| pACYC-Para- <i>mcr-1</i> V193A               | pACYCDuet-1 derivative replacing T7 promoter with arabinose promoter and carrying <i>mcr-1</i> gene with mutation V193A.                        | This study       |
| pACYC-Para- <i>mcr-1</i> N194A               | pACYCDuet-1 derivative replacing T7 promoter with arabinose promoter and carrying <i>mcr-1</i> gene with mutation N194A.                        | This study       |
| pACYC-Para- <i>mcr-1</i> P195A               | pACYCDuet-1 derivative replacing T7 promoter with arabinose promoter and carrying <i>mcr-1</i> gene with mutation P195A.                        | This study       |
| pACYC-Para- <i>mcr-1</i> I196A               | pACYCDuet-1 derivative replacing T7 promoter with arabinose promoter and carrying <i>mcr-1</i> gene with mutation I196A.                        | This study       |
| pACYC-Para- <i>mcr-1</i> M197A               | pACYCDuet-1 derivative replacing T7 promoter with arabinose promoter and carrying <i>mcr-1</i> gene with mutation M197A.                        | This study       |
| pACYC-Para- <i>mcr-1</i> P198A               | pACYCDuet-1 derivative replacing T7 promoter with arabinose promoter and carrying <i>mcr-1</i> gene with mutation P198A.                        | This study       |
| pACYC-Para- <i>mcr-1</i> I199A               | pACYCDuet-1 derivative replacing T7 promoter with arabinose promoter and carrying <i>mcr-1</i> gene with mutation I199A.                        | This study       |
| pACYC-Para- <i>mcr-1</i> Y200A               | pACYCDuet-1 derivative replacing T7 promoter with arabinose promoter and carrying <i>mcr-1</i> gene with mutation Y200A.                        | This study       |
| pACYC-Para- <i>mcr-1</i> S201A               | pACYCDuet-1 derivative replacing T7 promoter with arabinose promoter and carrying <i>mcr-1</i> gene with mutation S201A.                        | This study       |
| pACYC-Para- <i>mcr-1</i> V202A               | pACYCDuet-1 derivative replacing T7 promoter with arabinose promoter and carrying <i>mcr-1</i> gene with mutation V202A.                        | This study       |
| pACYC-Para- <i>mcr-1</i> G203A               | pACYCDuet-1 derivative replacing T7 promoter with arabinose promoter and carrying <i>mcr-1</i> gene with mutation G203A.                        | This study       |
| pACYC-Para- <i>mcr-1</i> K204A               | pACYCDuet-1 derivative replacing T7 promoter with arabinose promoter and carrying <i>mcr-1</i> gene with mutation K204A.                        | This study       |
| pACYC-Para- <i>mcr-1</i> L205A               | pACYCDuet-1 derivative replacing T7 promoter with arabinose promoter and carrying <i>mcr-1</i> gene with mutation L205A.                        | This study       |
| pACYC-Para- <i>mcr-1</i> M197E               | pACYCDuet-1 derivative replacing T7 promoter with arabinose promoter and carrying <i>mcr-1</i> gene with mutation M197E.                        | This study       |
| pACYC-Para- <i>mcr-1</i> L64F+I65Y           | pACYCDuet-1 derivative replacing T7 promoter with arabinose promoter and carrying <i>mcr-1</i> gene with mutation L64F+I65Y.                    | This study       |
| pACYC-Para- <i>mcr-1</i> L165A+I168A         | pACYCDuet-1 derivative replacing T7 promoter with arabinose promoter and carrying <i>mcr-1</i> gene with mutation L165A+I168A.                  | This study       |
| pACYC-Para- <i>mcr-1</i> M197A+Y200A         | pACYCDuet-1 derivative replacing T7 promoter with arabinose promoter and carrying <i>mcr-1</i> gene with mutation M197A+Y200A.                  | This study       |
| pACYC-Para- <i>mcr-1</i> K204E+K211A         | pACYCDuet-1 derivative replacing T7 promoter with arabinose promoter and carrying <i>mcr-1</i> gene with mutation K204E+K211A.                  | This study       |
| pACYC-Para- <i>mcr-1</i> M197E+R184A+K187A   | pACYCDuet-1 derivative replacing T7 promoter with arabinose promoter and carrying <i>mcr-1</i> gene with mutation M197E+R184A+K187A.            | This study       |
| pACYC-Para- <i>mcr-1</i> L64A+I65A+L68A+L69A | pACYCDuet-1 derivative replacing T7 promoter with arabinose promoter and carrying <i>mcr-1</i> gene with mutation L64A+I65A+L68A+L69A.          | This study       |
| pACYC-Para- <i>mcr-1</i> ΔP188-P195          | pACYCDuet-1 derivative replacing T7 promoter with arabinose promoter and carrying <i>mcr-1</i> gene with the deletion of residues P188 to P195. | This study       |
