# Supplementary material for: A new variant of the colistin resistance gene MCR-1 with co-resistance to β-lactam antibiotics reveals a potential novel antimicrobial peptide
Source: PubMed Central journal article supplement (PMC10786390; doi:10.1371/journal.pbio.3002433), 2023-12-13
Supplement: pbio.3002433.s030.pdf [file pbio.3002433.s030.pdf]

Table S9. Primers used in this study

| Primers                     | Description                                    | Reference/source |
|-----------------------------|------------------------------------------------|------------------|
| lpoB-sgRNA1-5F              | tagcCGGGTGCCTAAACTGTCCTG                       | This study       |
| lpoB-sgRNA1-3R              | aaacCAGGACAGTTTAGGCACCCG                       | This study       |
| lpoB-sgRNA2-5F              | tagcGATGGTCAGTAAGATGCTTG                       | This study       |
| lpoB-sgRNA2-3R              | aaacCAAGCATCTTACTGACCATC                       | This study       |
| ldtD-sgRNA1-5F              | tagcTCGCTGGTCTACTATCAGAA                       | This study       |
| ldtD-sgRNA1-3R              | aaacTTCTGATAGTAGACCAGCGA                       | This study       |
| ldtD-sgRNA2-5F              | tagcATGTTGCTTAATATGATGTG                       | This study       |
| ldtD-sgRNA2-3R              | aaacCACATCATATTAAGCAACAT                       | This study       |
| ppb1b-sgRNA1-5F             | tagcGAGGTGTATCTCGGTCAGAG                       | This study       |
| ppb1b-sgRNA1-3R             | aaacCTCTGACCGAGATACACCTC                       | This study       |
| ppb1b-sgRNA2-5F             | tagcAAATCCGGGAAACCACTGCG                       | This study       |
| ppb1b-sgRNA2-3R             | aaacCGCAGTGGTTTCCCGGATT                        | This study       |
| lpoB-LR-5F                  | CTGATCATGAATAACCAACCGCC                        | This study       |
| lpoB-LR-3R                  | TGCGAAACGGCACAAGATTCACCCCTTACAAAATATAG         | This study       |
| lpoB-RR-5F                  | TGCCGTTTCGCAGCAATAATCCCATCAC                   | This study       |
| lpoB-RR-3R                  | CTGACGCGCTATGCACTAAA                           | This study       |
| ldtD-LR-5F                  | AGCAGCGCGACTGGATGCTC                           | This study       |
| ldtD-LR-3R                  | ATTTCCCCGAACTACTTCATCCCTTGCCCCCTGTTTTAT        | This study       |
| ldtD-RR-5F                  | ATAAAAACAGGGGGCAAGGGATGAAGTAGTTCCGGGAAAT       | This study       |
| ldtD-RR-3R                  | AGTTGCACCGGTTTGCGCGT                           | This study       |
| ppb1b-LR-5F                 | AAGCCGGATCGCCATTCTGTTAT                        | This study       |
| ppb1b-LR-3R                 | CGGTATTTACGCTTAGATGGCTTTTTCTCCGCAATATTC        | This study       |
| ppb1b-RR-5F                 | TGCGGAGAAAAAGCCATCTAAGCGTGAAATACCG             | This study       |
| ppb1b-RR-3R                 | ATCTCTTCGGCGGTCACAACAGAA                       | This study       |
| <i>mcr-1</i> NP fuse-F      | agataaaatatttctagaAGGAAAAAGCGAAGGCT            | This study       |
| <i>mcr-1</i> TAA fuse-R     | attgagatctgcatatgTCAGCGGATGAATGCGGT            | This study       |
| pACYC-araC-F                | GTCGACGGTATCGATAAGCTTTTATGACAACTTGACGGCTACATCA | This study       |
| ParaBAD- <i>mcr-1</i> -R    | AAACGGGTATGGAGAAACAGTAGAGA                     | This study       |
| ParaBAD- <i>mcr-1</i> -F    | CTGTTTCTCCATACCCGTTTTTTTTGAGTAGTTTCTCATGATGCAG | This study       |
| terminator- <i>mcr-1</i> -R | CGTCGTTTTACTCAGCGGATGAATGCGGT                  | This study       |
| <i>mcr-1</i> -terminator-F  | ATCCGCTGAGTAAAACGACGGCCAGTcaaa                 | This study       |
| terminator-pACYC-R          | CGCTCTAGAACTAGTGGATCCCAGctgcagTAACACTCGTcga    | This study       |
| MCR-1-linker delet-F        | GTTTTCTTCGCGTGCATAAGATCATGCCAATCTACTCGGTGGG    | This study       |
| MCR-1-linker delet-R        | ACCGAGTAGATTGGCATGCTTTATGCACGCGAAAGAAACTGG     | This study       |
| MCR-1 L189A-F               | gccCGTAGCTATGTCAATCCGATCATGCCAAT               | This study       |
| MCR-1 L189A-R               | TTGACATAGCTACGggcCGGCTTATGCACGCGAAA            | This study       |
| MCR-1 R190A-F               | CTGgccAGCTATGTCAATCCGATCATGCCAAT               | This study       |
| MCR-1 R190A-R               | TTGACATAGCTggcCAGCGGCTTATGCACGCG               | This study       |
| MCR-1 S191A-F               | CTGCGTgccTATGTCAATCCGATCATGCCAAT               | This study       |
| MCR-1 S191A-R               | TTGACATAggcACGCAGCGGCTTATGCACGCG               | This study       |
| MCR-1 Y192A-F               | gccGTCAATCCGATCATGCCAATCTACTCGGT               | This study       |
| MCR-1 Y192A-R               | ATGATCGGATTGACggcGCTACGCAGCGGCTTATGC           | This study       |
| MCR-1 V193A-F               | TAGCTATgccAATCCGATCATGCCAATCTACTC              | This study       |
| MCR-1 V193A-R               | TCGGATTggcATAGCTACGCAGCGGCTTATGC               | This study       |
| MCR-1 N194A-F               | TATGTcggcCCGATCATGCCAATCTACTCGGT               | This study       |
| MCR-1 N194A-R               | ATGATCGGggcGACATAGCTACGCAGCGGCTT               | This study       |
| MCR-1 M197A-F               | AATCCGATCgccCCAATCTACTCGGTGGGTAAGC             | This study       |
| MCR-1 M197A-R               | ATTGGggcGATCGGATTGACATAGCTACGCAG               | This study       |
| MCR-1 P198A-F               | GATCATGgccATCTACTCGGTGGGTAAGCTTGC              | This study       |
| MCR-1 P198A-R               | AGTAGATggcCATGATCGGATTGACATAGCTACG             | This study       |
| MCR-1 I199A-F               | ATCATGCCAgccTACTCGGTGGGTAAGCTTGCC              | This study       |
| MCR-1 I199A-R               | GAGTAggcTGGCATGATCGGATTGACATAGCT               | This study       |
| MCR-1 Y200A-F               | ATCATGCCAATCgccTCGGTGGGTAAGCTTGCCA             | This study       |
| MCR-1 Y200A-R               | GAggcGATTGGCATGATCGGATTGACATAGCT               | This study       |
| MCR-1 S201A-F               | AATCTACgccGTGGGTAAGCTTGCCAGTATTGA              | This study       |
| MCR-1 S201A-R               | TACCCACggcGTAGATTGGCATGATCGGATTGA              | This study       |
| MCR-1 V202A-F               | ATCTACTCGggcGGTAAGCTTGCCAGTATTGAGTATAAAA       | This study       |
| MCR-1 V202A-R               | TTACCggcCGAGTAGATTGGCATGATCGGATT               | This study       |
| MCR-1 G203A-F               | ATCTACTCGGTGggcAAGCTTGCCAGTATTGAGTATAAAAAA     | This study       |
| MCR-1 G203A-R               | TTggcCACCGAGTAGATTGGCATGATCGGATT               | This study       |
| MCR-1 K204A-F               | GTgccCTTGCCAGTATTGAGTATAAAAAAGCC               | This study       |
| MCR-1 K204A-R               | AATACTGGCAAGggcACCCACCGAGTAGATTGGCA            | This study       |
| MCR-1 L205A-F               | GTAAGgccGCCAGTATTGAGTATAAAAAAGCCAG             | This study       |
| MCR-1 L205A-R               | AATACTGGCggcCTTACCCACCGAGTAGATTGGC             | This study       |

|                        |                                                           |            |
|------------------------|-----------------------------------------------------------|------------|
| MCR-1 K187A-F          | TCTTTGCGTGCATgccCCGCTGCGTAGCTATGTCAA                      | This study |
| MCR-1 K187A-R          | ggcATGCACGCGAAAGAACTGGCATAATGAC                           | This study |
| MCR-1 I196A-F          | TATGTCAATCCGgccTGCCAATCTACTCGGTGGGT                       | This study |
| MCR-1 I196A-R          | CAGgcCGGATTGACATAGCTACGCAGCGGCTT                          | This study |
| Ec-LpxC-F              | TTCAGGCGACGGGTGTCGGTTTACA                                 | This study |
| Ec-LpxC-R              | CCGGCGCGTTAACTTCGATAACAAT                                 | This study |
| Ec-LdtD-F              | TGTCGGCAATCAGTTTGTGCCTGGC                                 | This study |
| Ec-LdtD-R              | CGGCATACAACAGTTGAAGCTGGTT                                 | This study |
| Ec-PBP1B-F             | CTATGAGGATGAAGAACCATGATGCCG                               | This study |
| Ec-PBP1B-R             | GCTTCACCATCTCGTTCTTGCTGAT                                 | This study |
| Ec-LpoB-F              | TTGATTACCGCGCTGGCGATGTTTC                                 | This study |
| Ec-LpoB-R              | TCTTACTGACCATCGGCTGCATTGC                                 | This study |
| Ec-16S-F               | TCAACGATCAGTTCGTGATCGACAG                                 | This study |
| Ec-AmpH-F              | GTCTGCTTTTTTCTGCCGTGCT                                    | This study |
| Ec-AmpH-R              | TTCACGGTCCCTGGTCGAGCAATT                                  | This study |
| Ec-16S-R               | CGGCCAGTTCACCAAAGTTAAAGGT                                 | This study |
| rseP-ATG-5F            | ATGCTGAGTTTTCTCTGG                                        | This study |
| rseP-180bp-3R          | aaCATATTCGGTGCCGAG                                        | This study |
| cpxP-5F                | ATGCGCATAGTTACCGCT                                        | This study |
| cpxP-180bp-3R          | TGCGATCTGCTGACGCTG                                        | This study |
| M197A-Y200A-5F         | ATCgcccgaatcgccTCGGTGGGTAAGCTTGCCA                        | This study |
| M197A-Y200A-3R         | CGAgcgattggcgcGATCGGATTGACATAGCTACGCA                     | This study |
| M197E-5F               | TCCGATCgagCCAATCTACTCGGTGGGTAAGC                          | This study |
| M197E-3R               | AGATTGGctcGATCGGATTGACATAGCTACGCA                         | This study |
| R184A-K187A-M197E-5F   | gctgcgtagctatgtcaatccgatcgagCCAATCTACTCGGTGGGTAAGC        | This study |
| R184A-K187A-M197E-3R   | ttgacatagctacgcagcggcgcgatgcagggcAAAGAACTGGCATAATGACTGCTG | This study |
| L165A-I168A-5F         | AGTgctgcgctggctTTACTGCCTGTGGTGGCGTT                       | This study |
| L165A-I168A-3R         | TAAagccagcgcagcACTTGCCACGATCAAGCCC                        | This study |
| L64F-I65Y-5F           | atgctaTtCTAcaccagctgttatcatcgtatcg                        | This study |
| L64F-I65Y-3R           | gcgtggtgTAGaAtagcatcgccaaagagc                            | This study |
| L64A-I65A-L68A-L69A-5F | gcgccaccacggcggaTCATCGTATCGCTATGTGCTAAAGC                 | This study |
| L64A-I65A-L68A-L69A-3R | tgccgctggtggccgcTAGCATCGCGCCAAAGAGC                       | This study |
| L64A-I65A-5F           | ATGCTAgcgccACCACGCTGTTATCATCGTATCG                        | This study |
| L64A-I65A-3R           | CGTGGTggccgcTAGCATCGCGCCAAAGAGC                           | This study |
| K204E-K211A-5F         | gagcttgccagttgagtagtgcAAAagccagtgcccaaaa                  | This study |
| K204E-K211A-3R         | ctcaatactggcaagctCaccacccagtagattggca                     | This study |
