# Supplementary material for: A new variant of the colistin resistance gene MCR-1 with co-resistance to β-lactam antibiotics reveals a potential novel antimicrobial peptide
Source: PubMed Central journal article supplement (PMC10786390; doi:10.1371/journal.pbio.3002433), 2023-12-13
Supplement: pbio.3002433.s031.pdf [file pbio.3002433.s031.pdf]

**Table S10. Synthetic peptides used in this study**

| <b>Peptides</b> | <b>Sequence</b>          | <b>Description</b>                                                                                        | <b>Reference/source</b> |
|-----------------|--------------------------|-----------------------------------------------------------------------------------------------------------|-------------------------|
| 24AA-WT         | KPLRSYVNPIMPIYSVGKLASIEY | A 24AA synthetic peptide derived from linker domain of MCR-1                                              | This study              |
| 24AA-2M         | KALRSYVNSIMPIYSVGKLASIEY | A 24AA synthetic peptide derived from linker domain of M6                                                 | This study              |
| 19AA-2M-tag     | KALRSYVNSIMPIYSVGKLWWWWW | A 19AA synthetic peptide derived from linker domain of M6 with five-tryptophan modification at C-terminal | This study              |
| Peptide MCR-1   | KPLRSYVNPIMPIYSV         | A 16AA synthetic peptide derived from linker domain of MCR-1 carrying biotin label at C-terminal          | This study              |
| Peptide M6      | KALRSYVNSIMPIYSV         | A 16AA synthetic peptide derived from linker domain of M6 carrying biotin label at C-terminal             | This study              |
